# Supplementary material for: Thieno-Thiazolostilbenes, Thienobenzo-Thiazoles, and Naphtho-Oxazoles: Computational Study and Cholinesterase Inhibitory Activity
Source: MDPI journal article supplement (doi:10.3390/molecules28093781), 2023-04-27
Supplement: s1 [file s1]

# Thieno-Thiazolostilbenes, Thienobenzo-Thiazoles, and Naphtho-Oxazoles: Computational Study and Cholinesterase Inhibitory Activity

Milena Mlakić <sup>1</sup>, Ema Đurčević <sup>1</sup>, Ilijana Odak <sup>2</sup>, Danijela Barić <sup>3,\*</sup>, Ines Juričević <sup>2</sup>, Ivana Šagud <sup>1,4</sup>, Franko Burčul <sup>5</sup>, Zlata Lasić <sup>6</sup>, Željko Marinić <sup>7</sup> and Irena Škorić <sup>1,\*</sup>

<sup>1</sup> Department of Organic Chemistry, Faculty of Chemical Engineering and Technology, University of Zagreb, Marulićev trg 19, HR-10000 Zagreb, Croatia

<sup>2</sup> Department of Chemistry, Faculty of Science and Education, University of Mostar, Matice hrvatske bb, 88000 Mostar, Bosnia and Herzegovina

<sup>3</sup> Group for Computational Life Sciences, Division of Physical Chemistry, Ruđer Bošković Institute, Bijenička Cesta 54, HR-10000 Zagreb, Croatia

<sup>4</sup> Croatian Agency for Medicinal Products and Medical Devices, Ksaverska Cesta 4, HR-10000 Zagreb, Croatia

<sup>5</sup> Department of Analytical Chemistry, Faculty of Chemistry and Technology, University of Split, Ruđera Boškovića 35, HR-21000 Split, Croatia

<sup>6</sup> Teva api Analytical R&D, Pliva, Prilaz Baruna Filipovića 25, HR-10000 Zagreb, Croatia; zлата.lasic01@pliva.com

<sup>7</sup> NMR Center, Rudjer Bošković Institute, Bijenička Cesta 54, HR-10000 Zagreb, Croatia;

\* Correspondence: dbaric@irb.hr (D.B.); iskoric@fkit.hr (I.Š.); Tel.: +385-1-4571-385 (D.B.); +385-1-4597-241 (I.Š.)

1. <sup>1</sup>H and <sup>13</sup>C NMR spectra of compounds **1a–10a** and **1–5**, **7** and **9** (Figures S1–S64).
2. MS and HRMS analyses of compounds **1a–10a** and **1–5**, **7** and **9** (Figures S65–S81).
3. Geometries of studied thieno-thiazolostilbenes and thienobenzo-thiazoles
4. Table S1.
4. Geometries of optimized complexes of molecules docked into the active site of BChE

## 1. $^1\text{H}$ and $^{13}\text{C}$ NMR spectra of compounds 1a–10a and 1–7

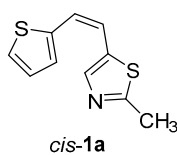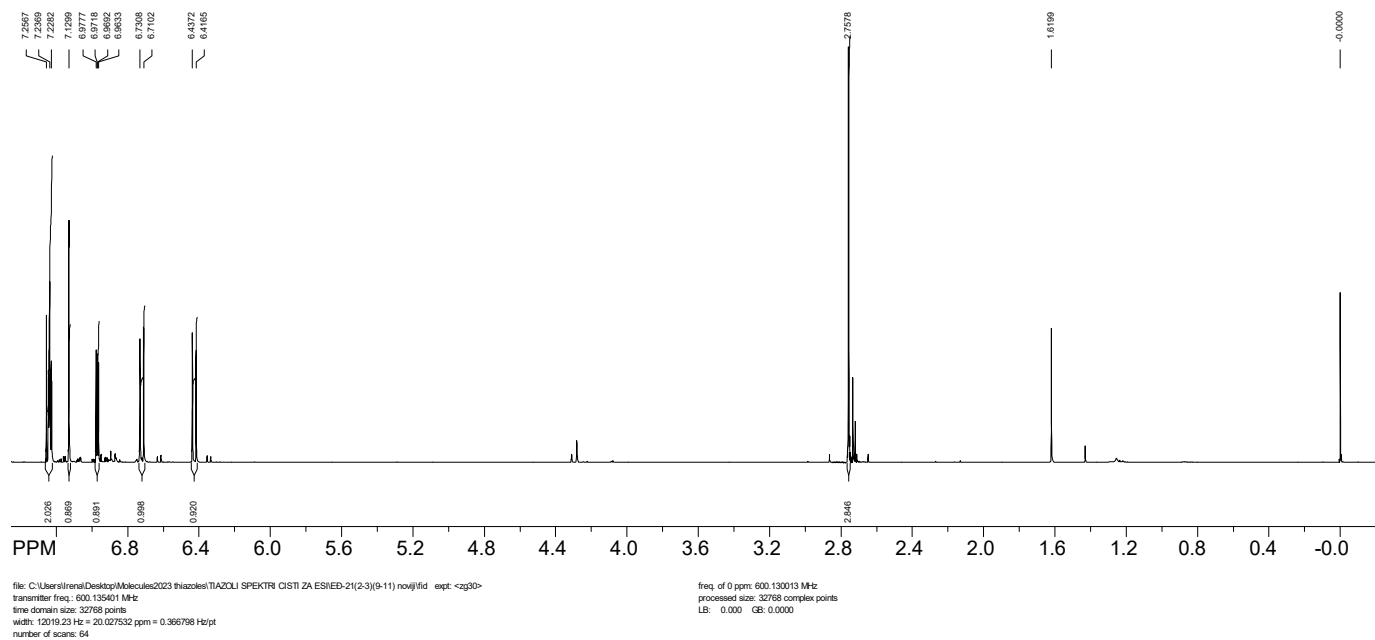

Figure S1.  $^1\text{H}$  NMR spectrum ( $\text{CDCl}_3$ ) of *cis*-1a.

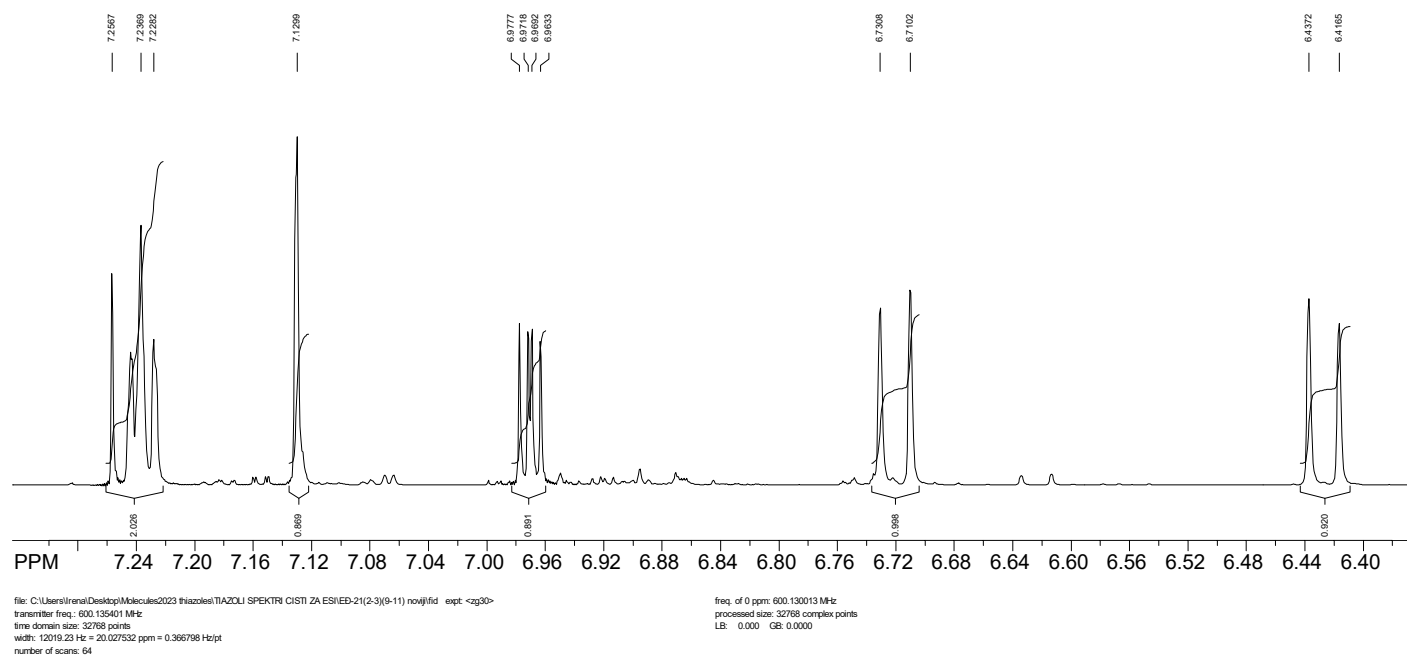

Figure S2. Aromatic part of the  $^1\text{H}$  NMR spectrum ( $\text{CDCl}_3$ ) of *cis*-1a.

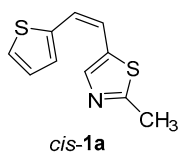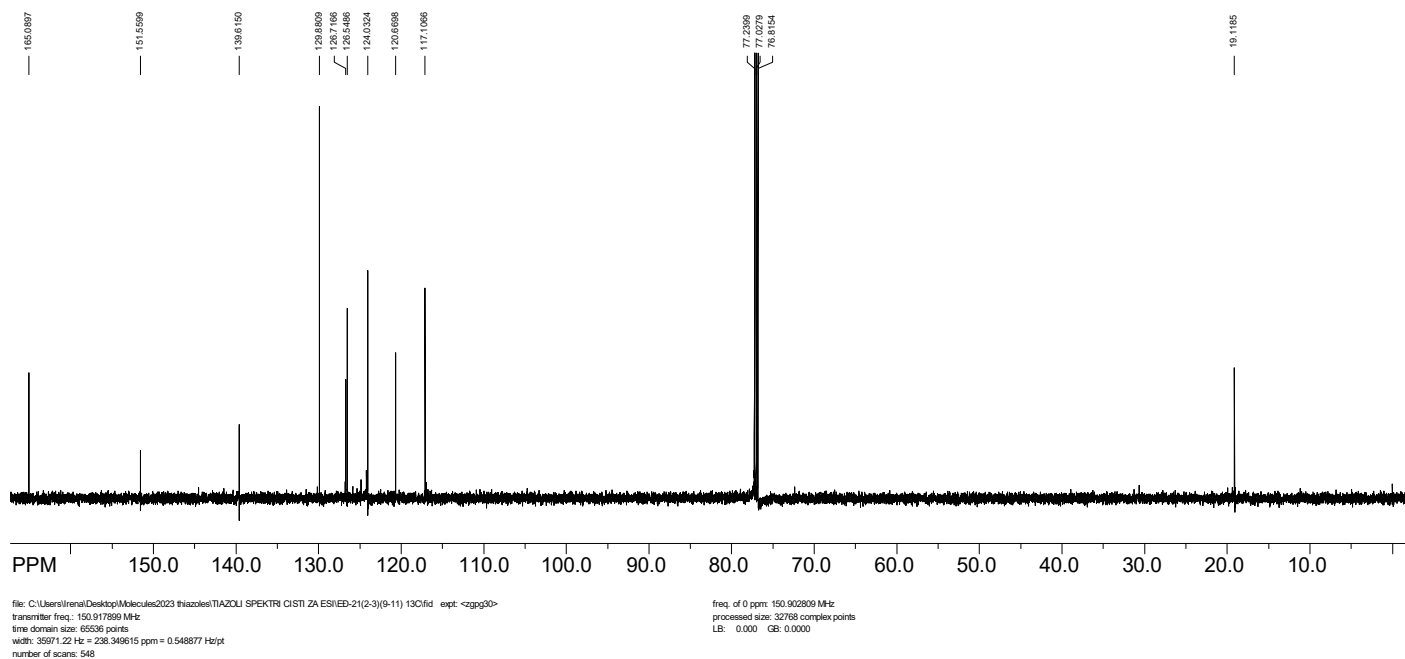

Figure S3.  $^{13}\text{C}$  NMR spectrum ( $\text{CDCl}_3$ ) of *cis-1a*.

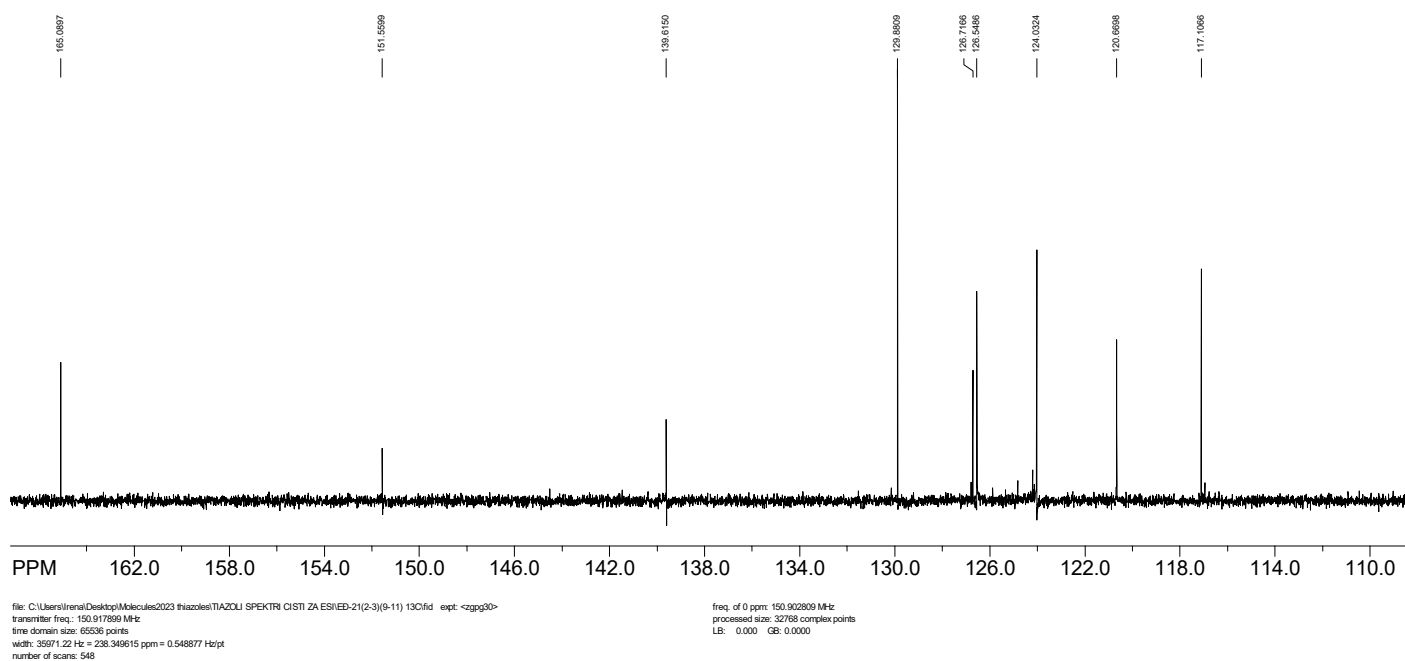

Figure S4. Aromatic part of the  $^{13}\text{C}$  NMR spectrum ( $\text{CDCl}_3$ ) of *cis-1a*.

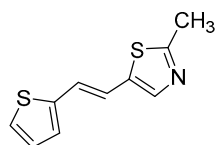

*trans*-1a

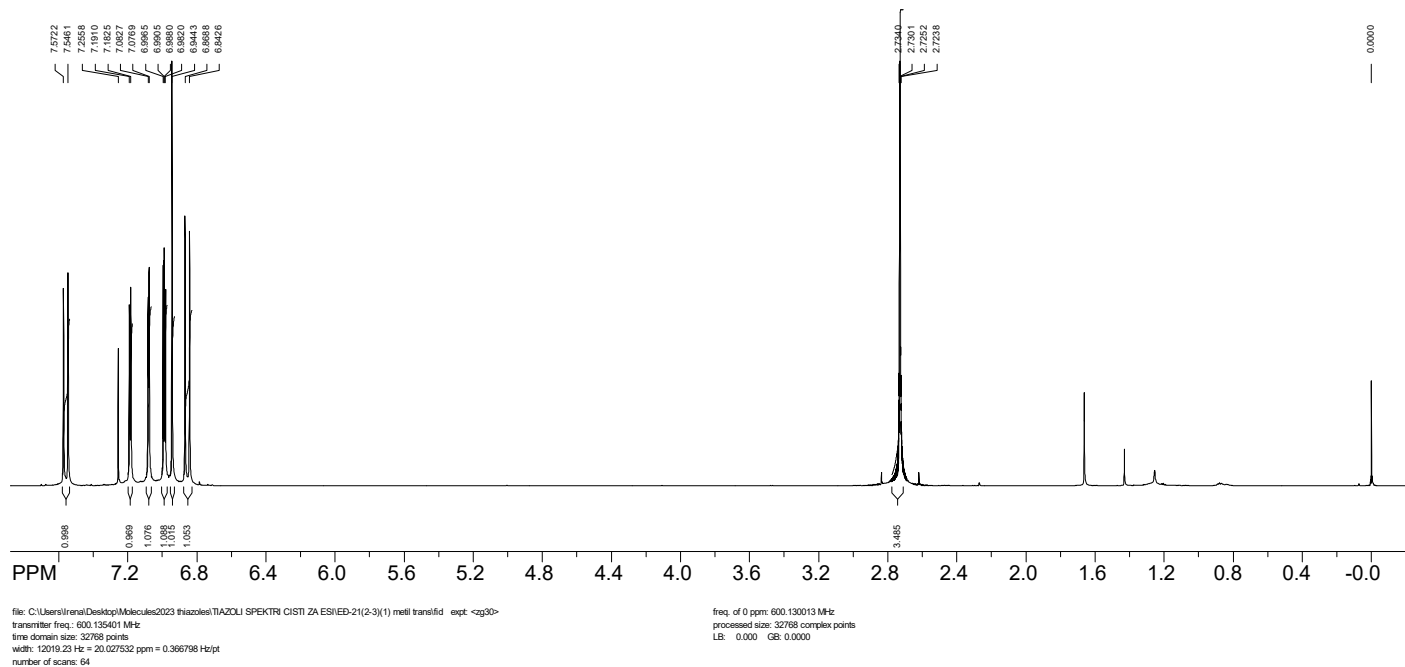

**Figure S5.**  $^1\text{H}$  NMR spectrum ( $\text{CDCl}_3$ ) of *trans*-1a.

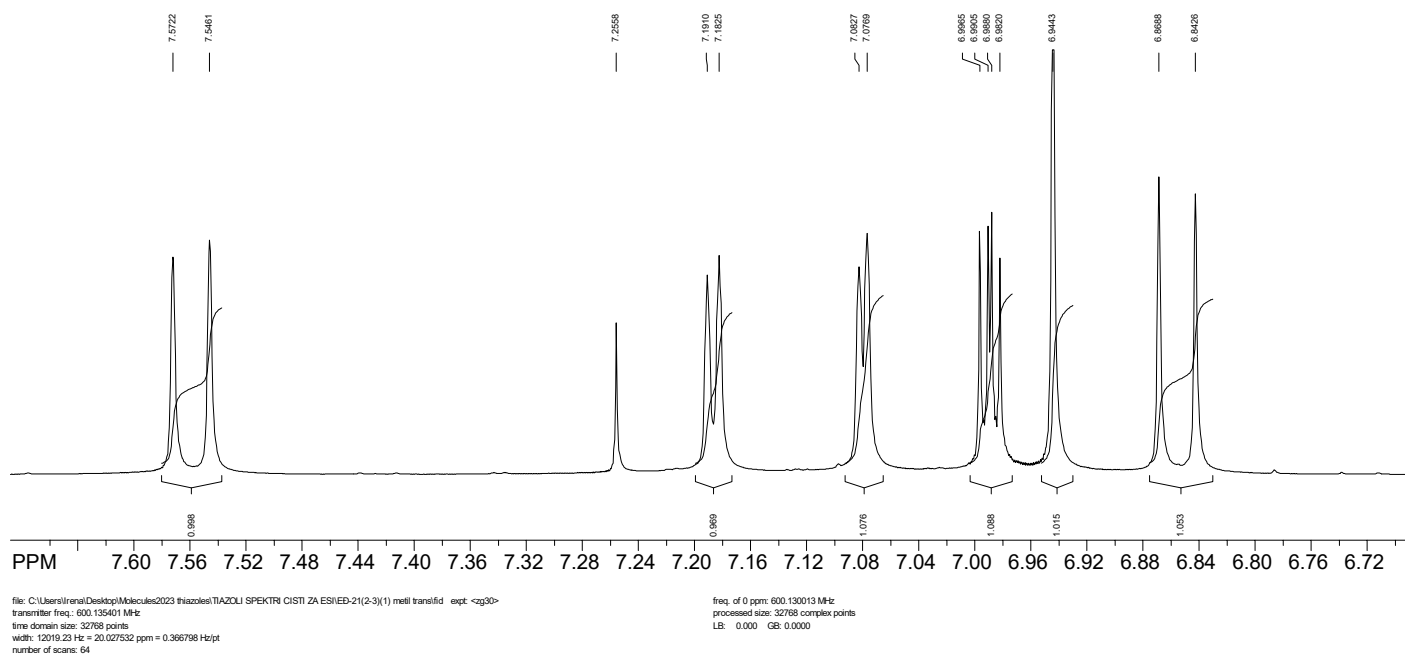

**Figure S6.** Aromatic part of the  $^1\text{H}$  NMR spectrum ( $\text{CDCl}_3$ ) of *trans*-1a.

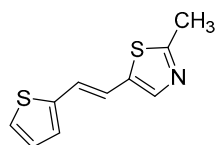

*trans*-1a

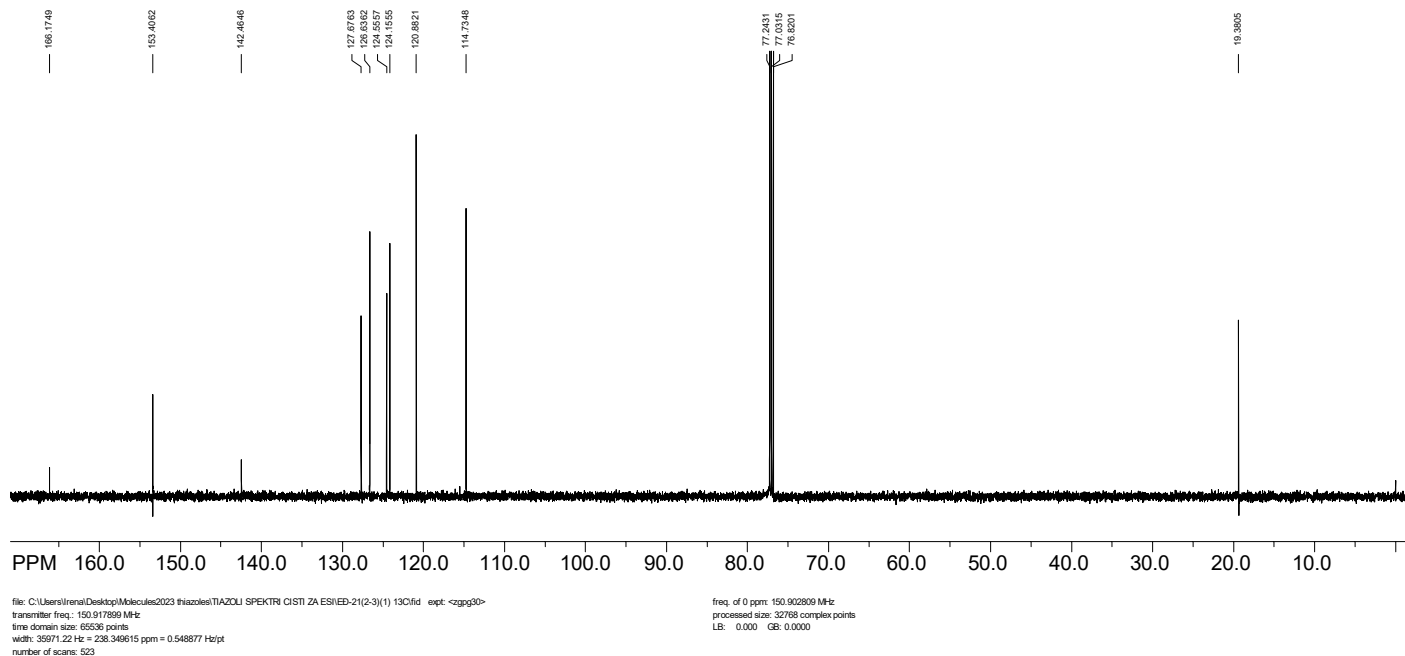

Figure S7.  $^{13}\text{C}$  NMR spectrum ( $\text{CDCl}_3$ ) of *trans*-1a.

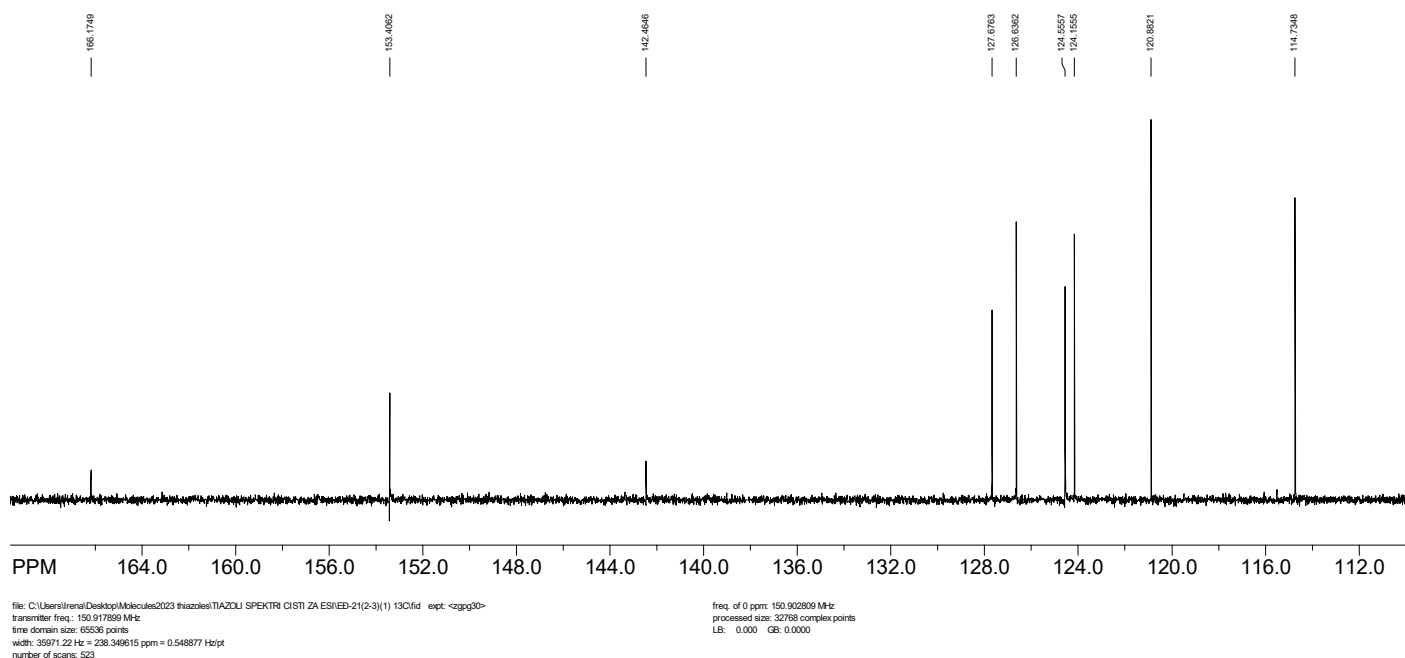

Figure S8. Aromatic part of the  $^{13}\text{C}$  NMR spectrum ( $\text{CDCl}_3$ ) of *trans*-1a.

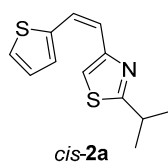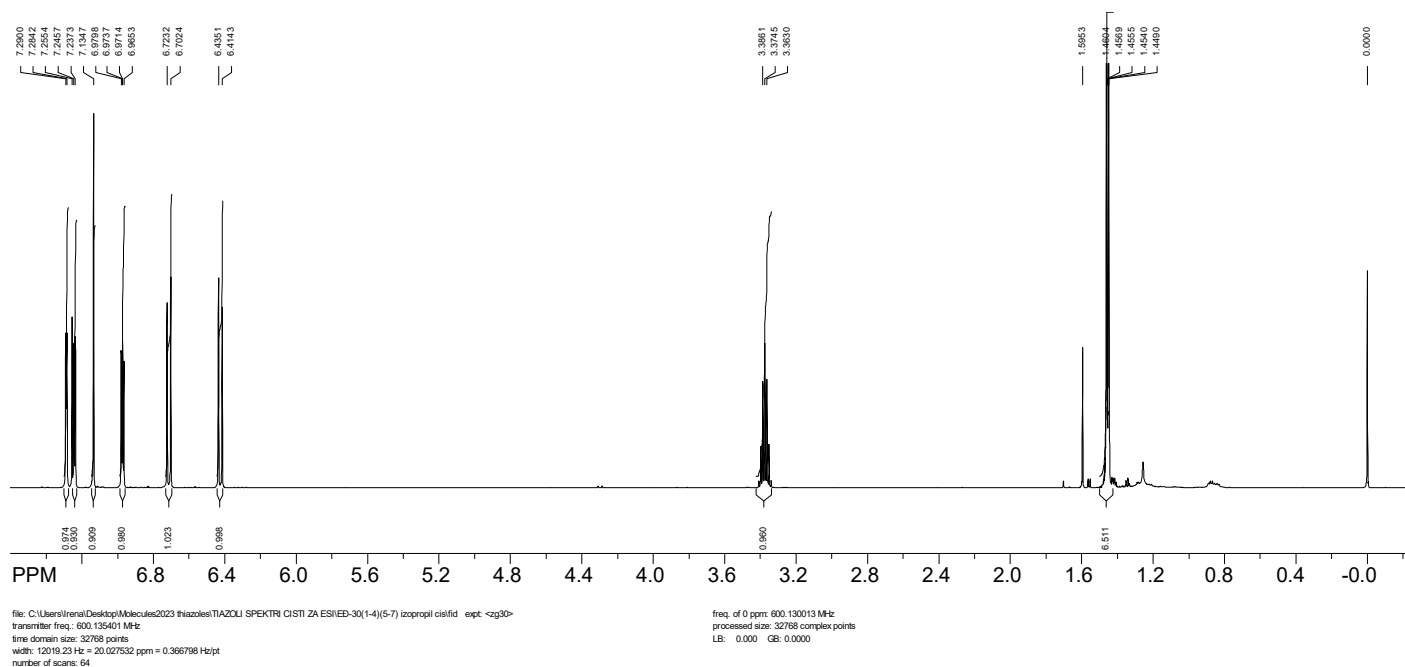

Figure S9.  $^1\text{H}$  NMR spectrum ( $\text{CDCl}_3$ ) of *cis-2a*.

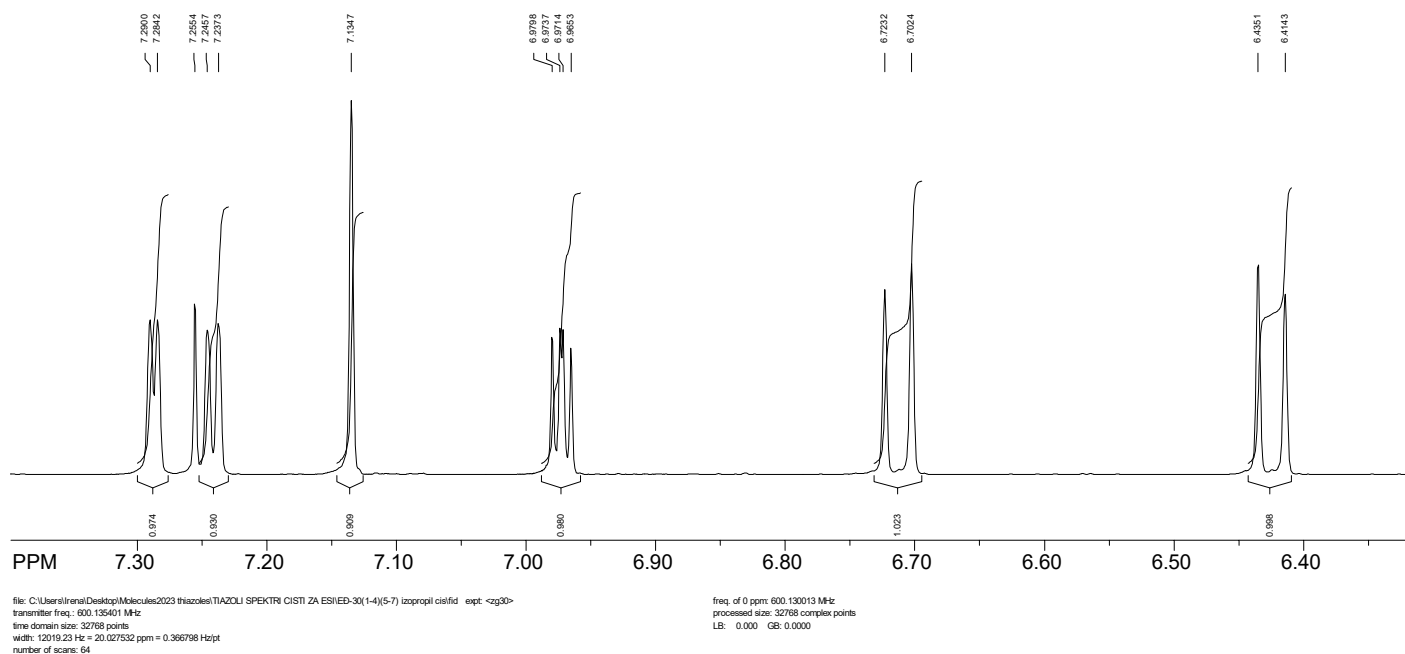

Figure S10. Aromatic part of the  $^1\text{H}$  NMR spectrum ( $\text{CDCl}_3$ ) of *cis-2a*.

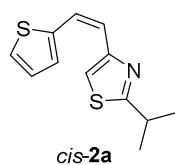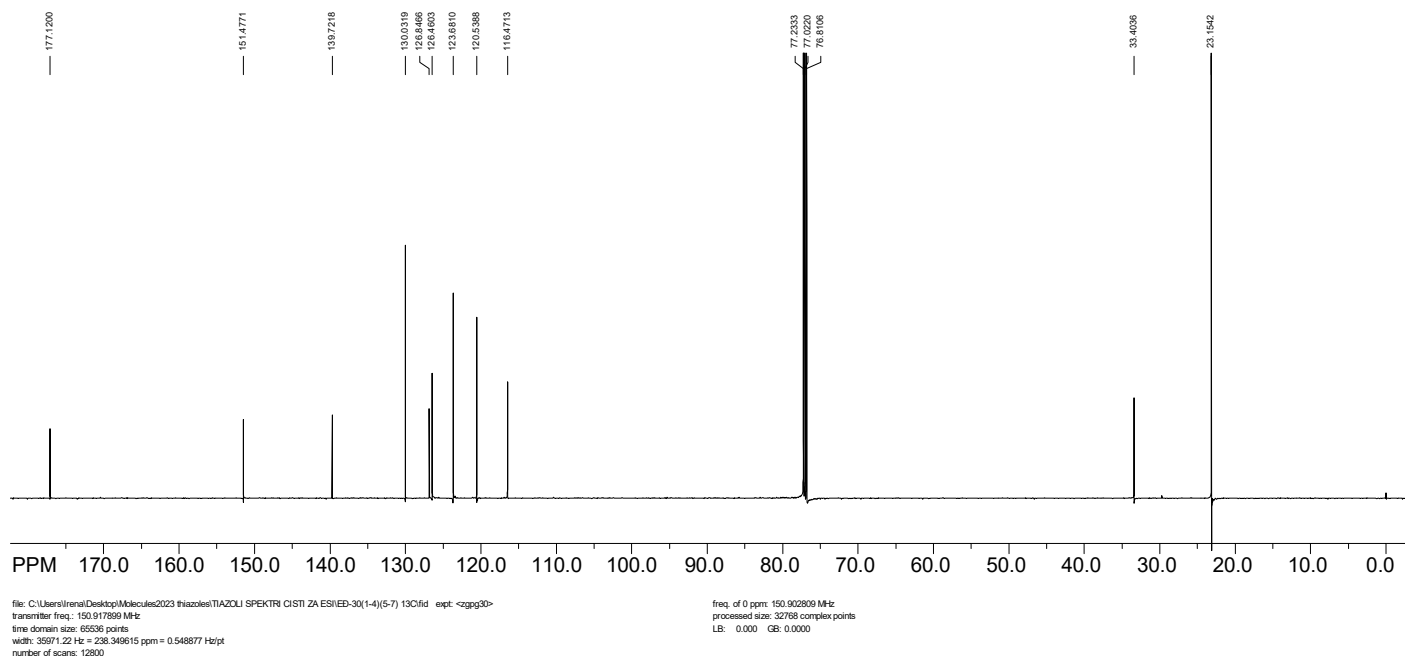

**Figure S11.**  $^{13}\text{C}$  NMR spectrum ( $\text{CDCl}_3$ ) of *cis-2a*.

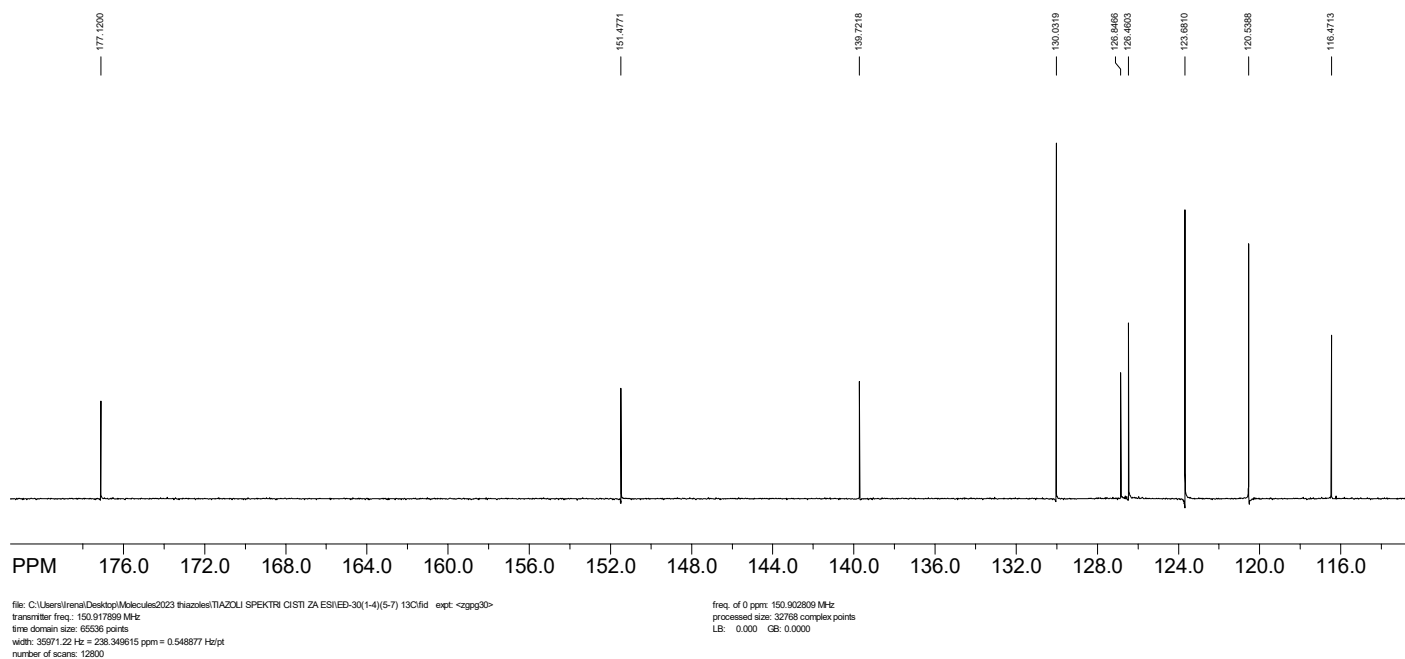

**Figure S12.** Aromatic part of the  $^{13}\text{C}$  NMR spectrum ( $\text{CDCl}_3$ ) of *cis-2a*.

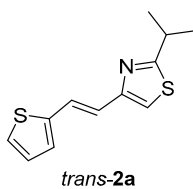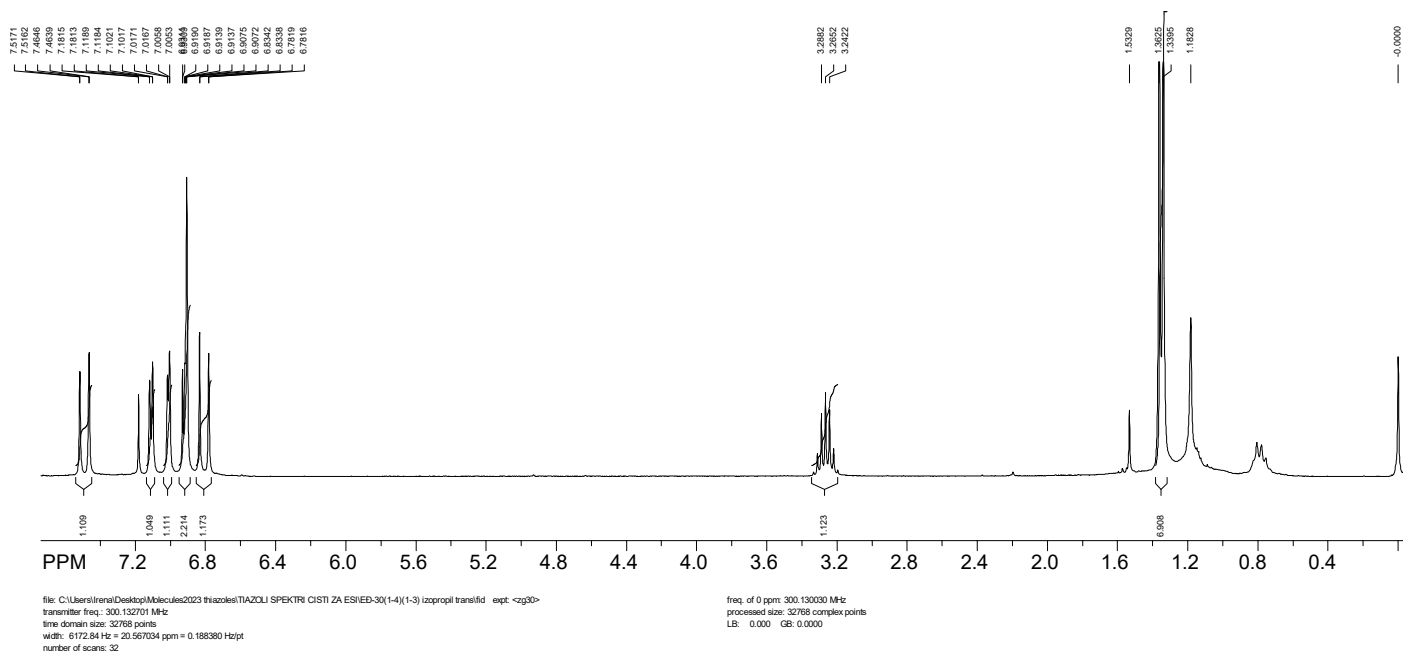

**Figure S13.**  $^1\text{H}$  NMR spectrum ( $\text{CDCl}_3$ ) of *trans*-2a.

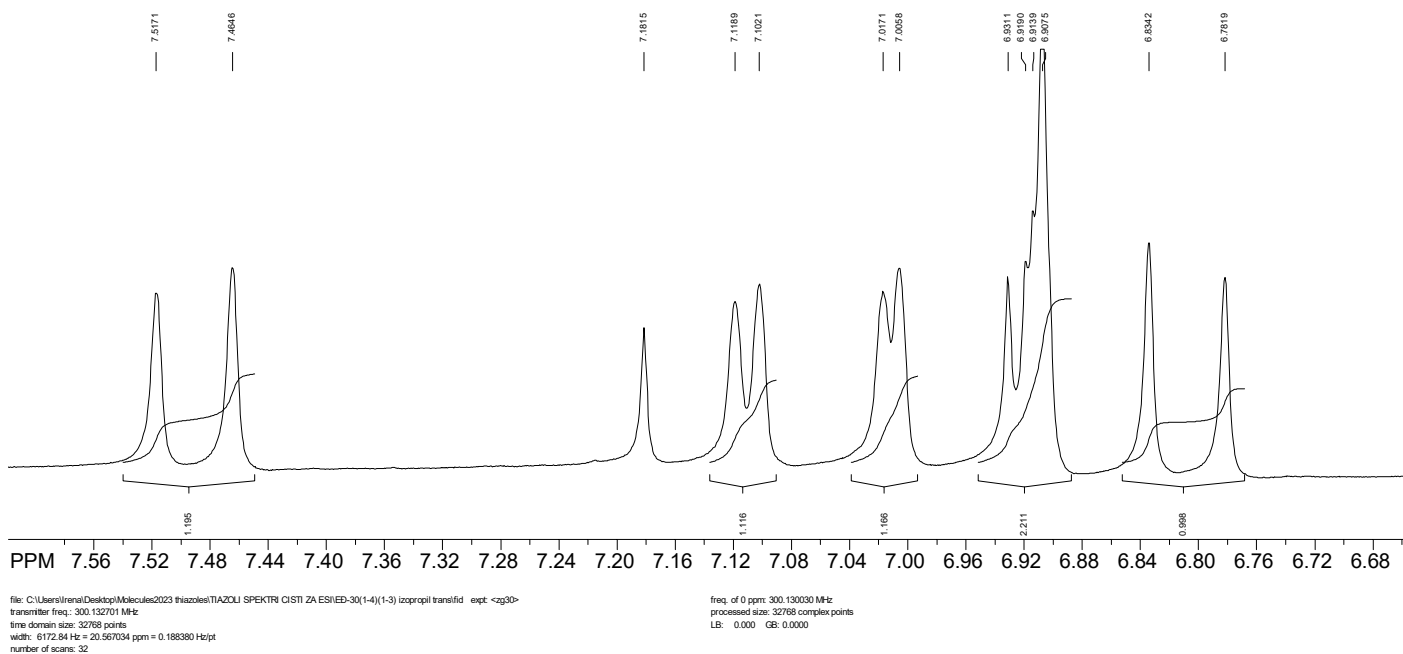

**Figure S14.** Aromatic part of the  $^1\text{H}$  NMR spectrum ( $\text{CDCl}_3$ ) of *trans*-2a.



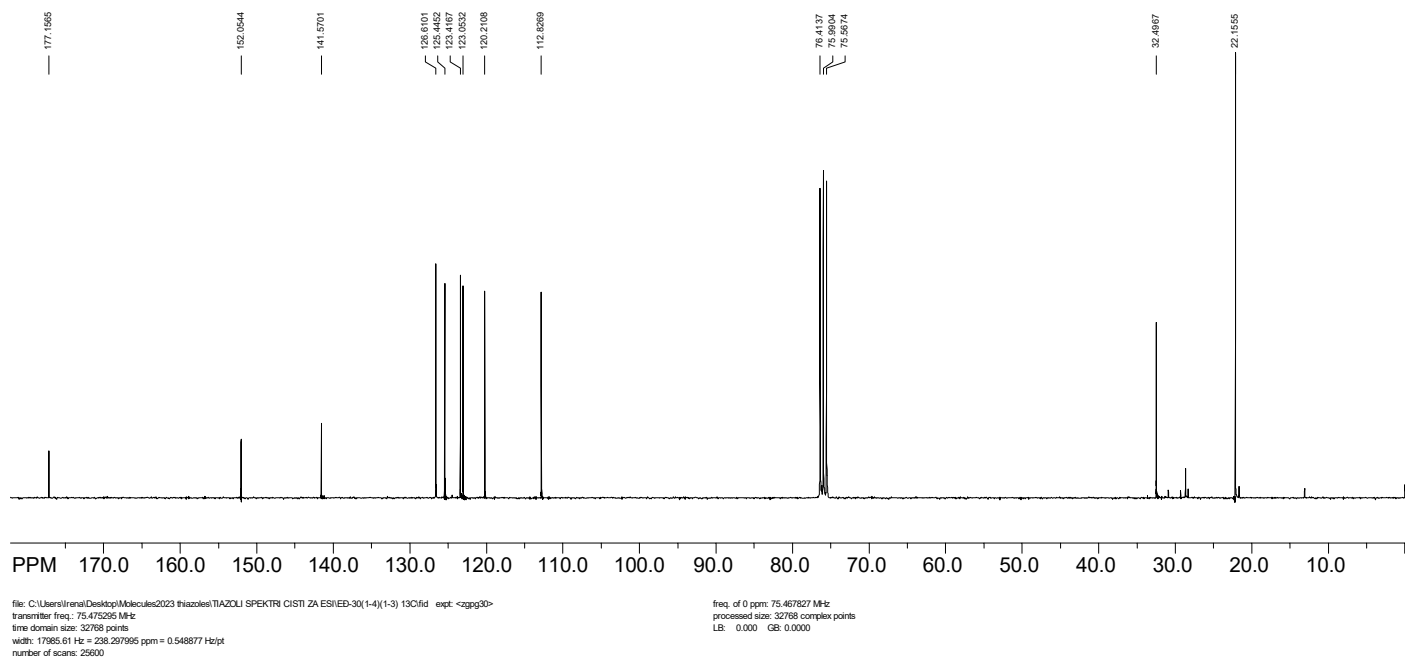

**Figure S15.**  $^{13}\text{C}$  NMR spectrum ( $\text{CDCl}_3$ ) of *trans*-**2a**.

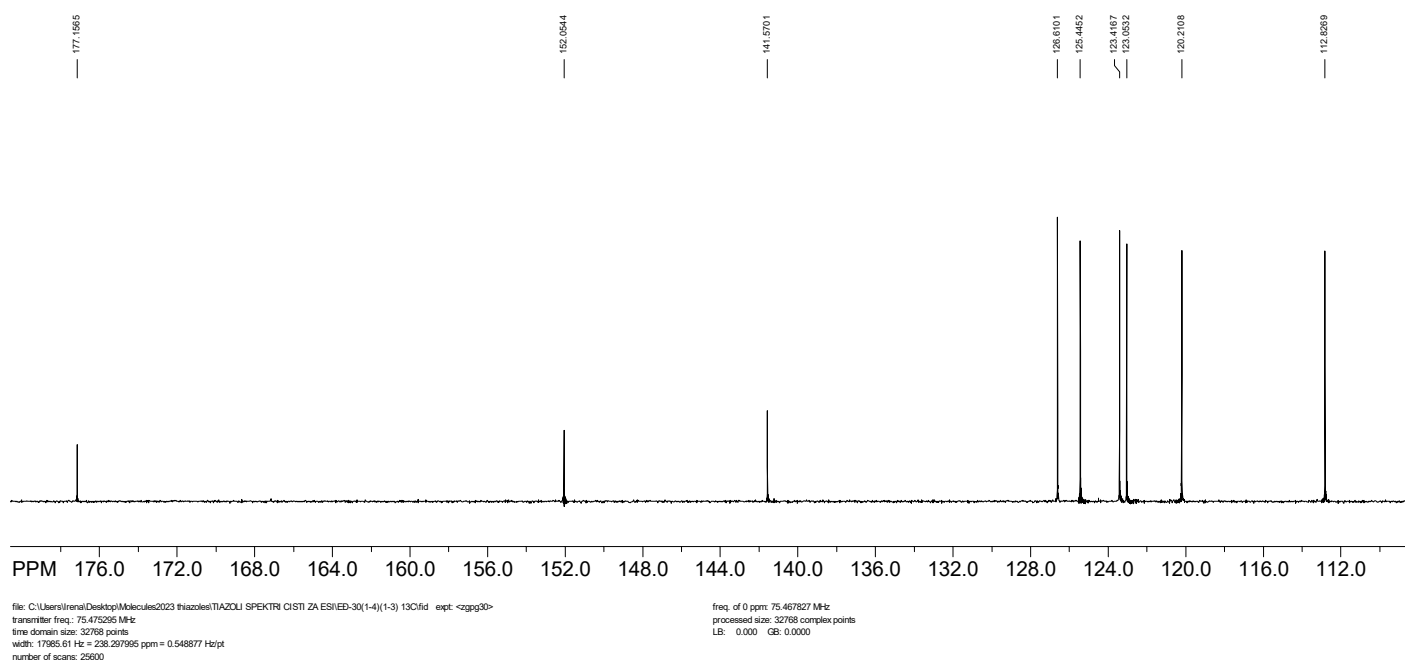

**Figure S16.** Aromatic part of the  $^{13}\text{C}$  NMR spectrum ( $\text{CDCl}_3$ ) of *trans*-**2a**.

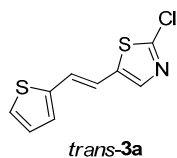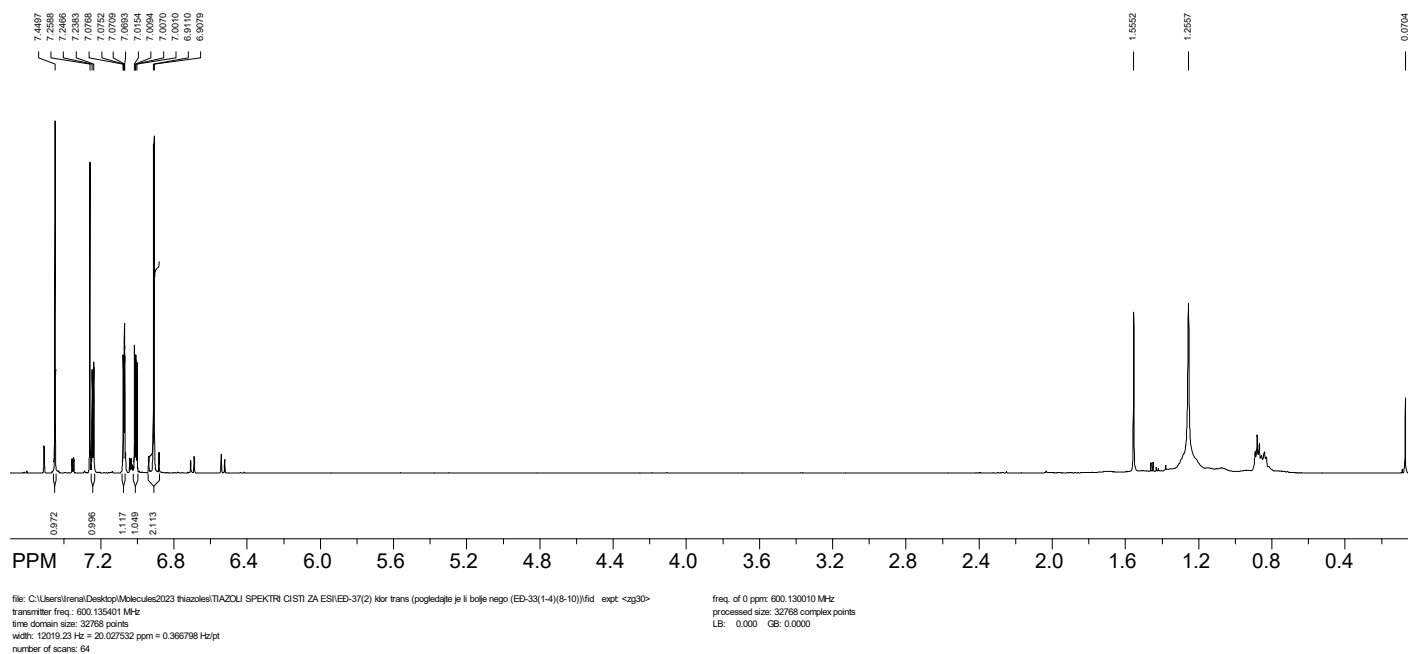

**Figure S17.**  $^1\text{H}$  NMR spectrum ( $\text{CDCl}_3$ ) of *trans*-3a.

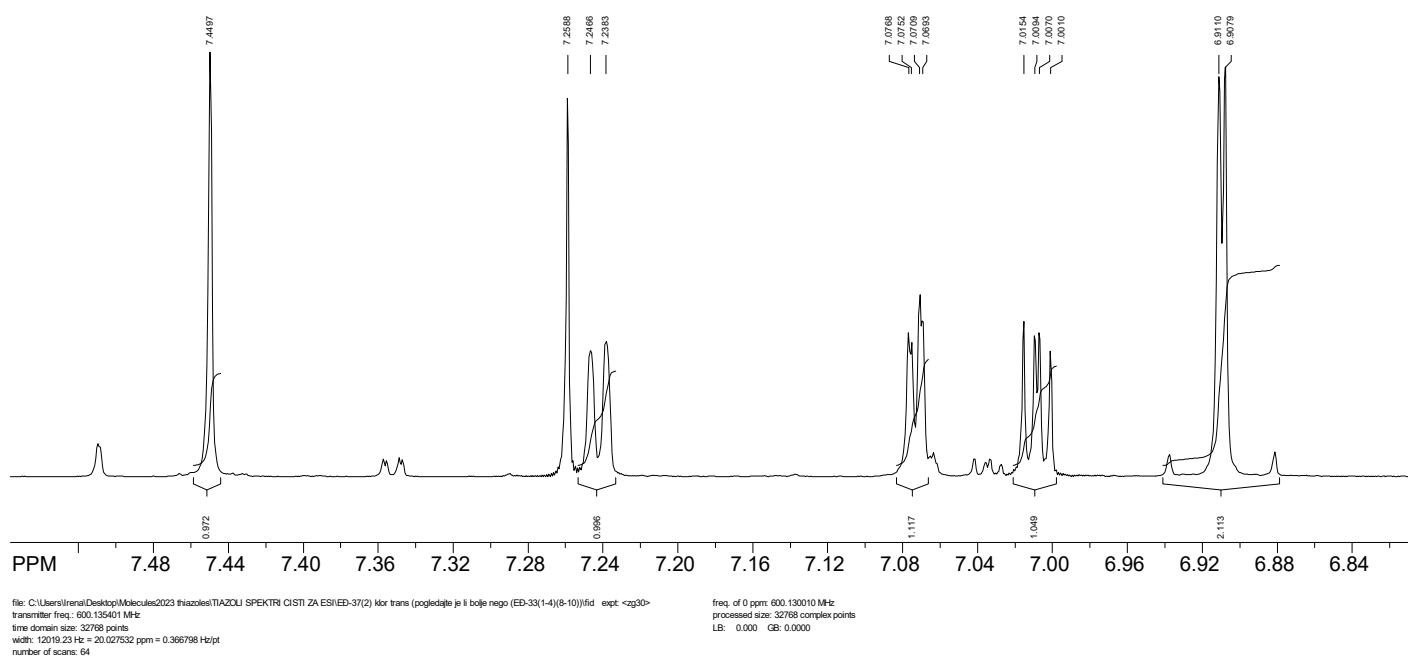

**Figure S18.** Aromatic part of the  $^1\text{H}$  NMR spectrum ( $\text{CDCl}_3$ ) of *trans*-3a.

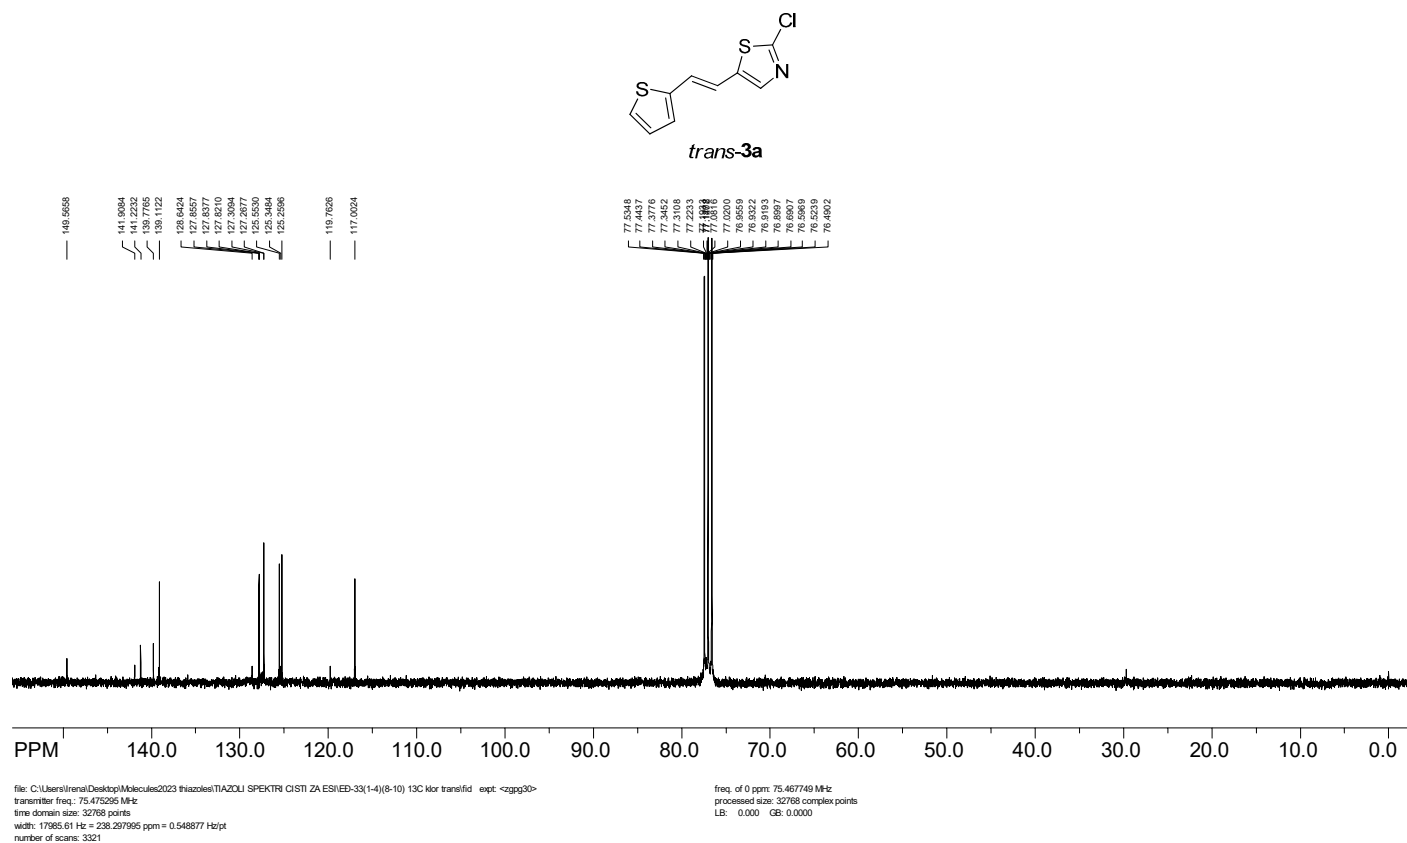

**Figure S19.**  $^{13}\text{C}$  NMR spectrum ( $\text{CDCl}_3$ ) of *trans-3a*.

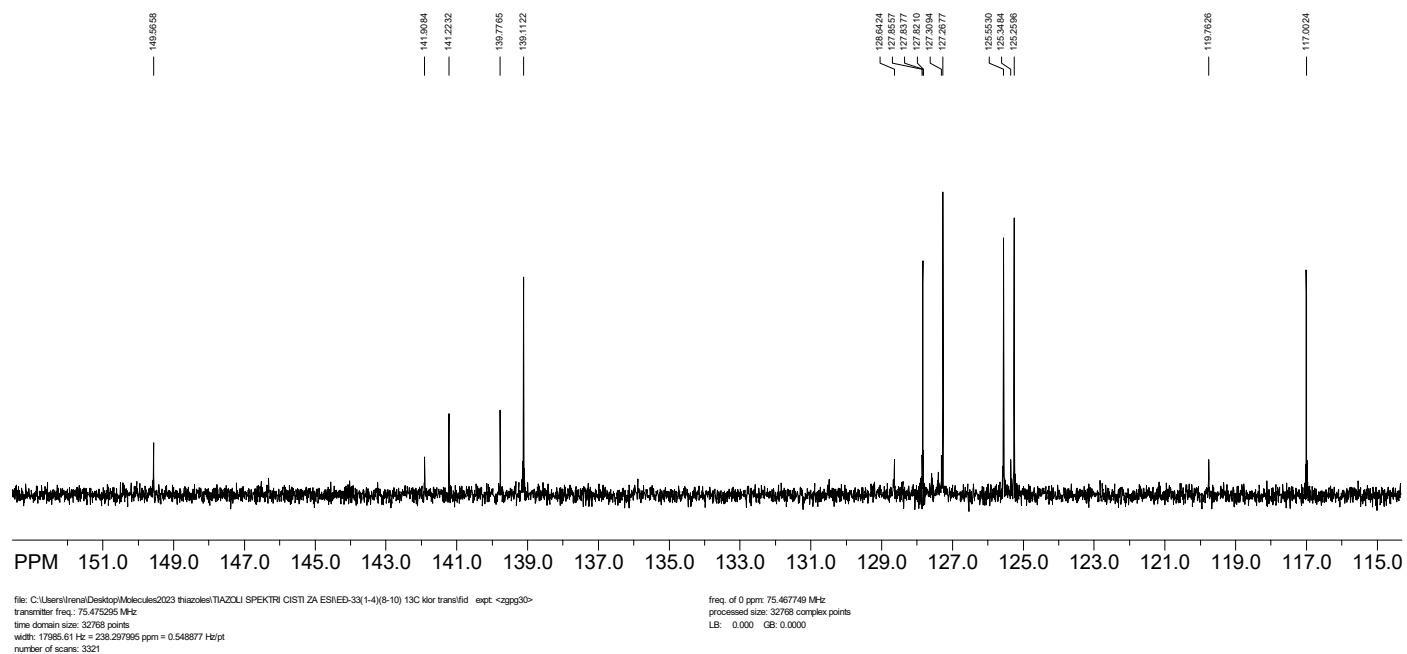

**Figure S20.** Aromatic part of the  $^{13}\text{C}$  NMR spectrum ( $\text{CDCl}_3$ ) of *trans-3a*.

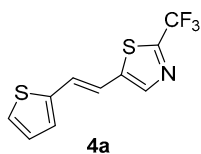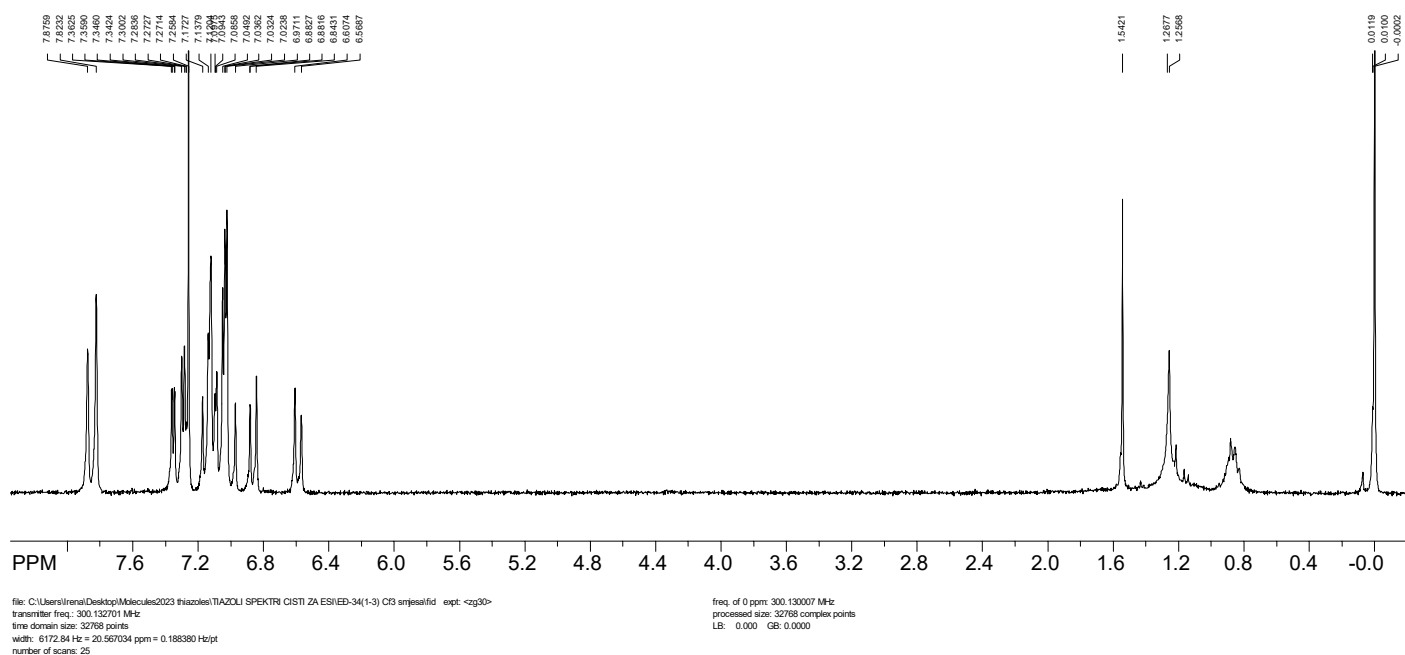

**Figure S21.**  $^1\text{H}$  NMR spectrum ( $\text{CDCl}_3$ ) of the pure mixture of isomers of **4a**.

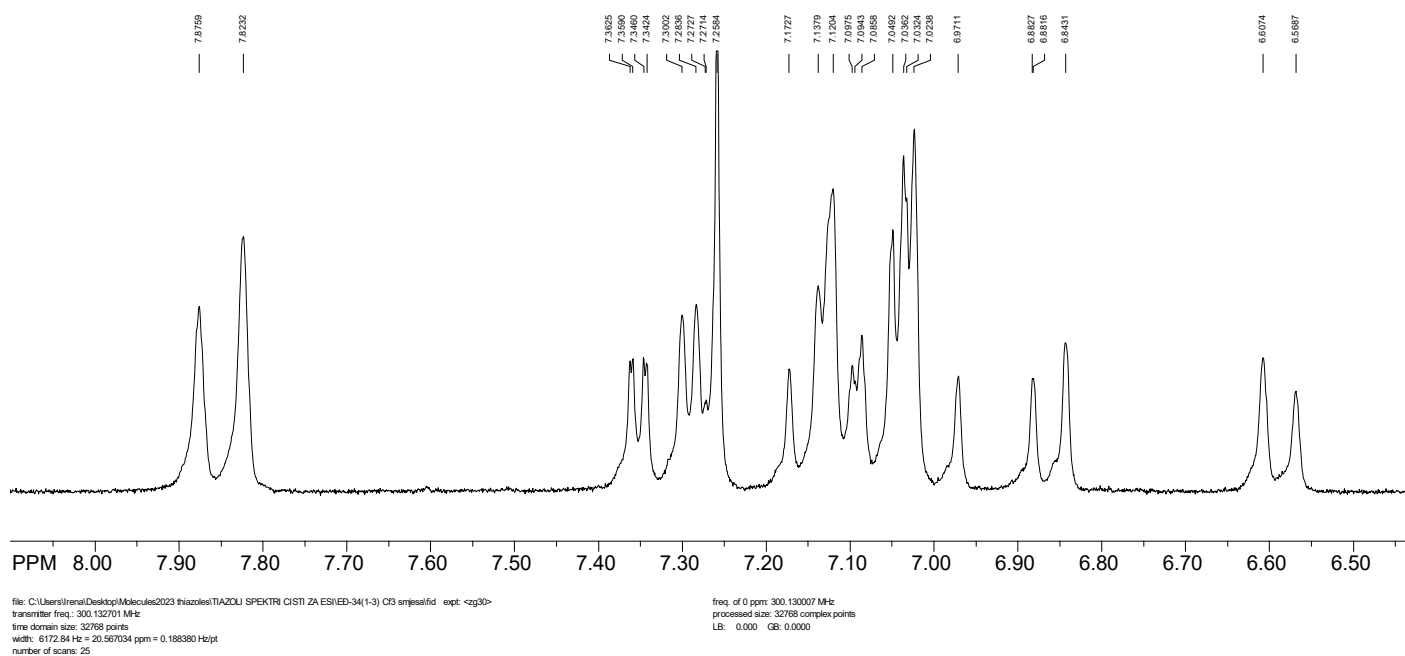

**Figure S22.** Aromatic part of the  $^1\text{H}$  NMR spectrum ( $\text{CDCl}_3$ ) of the pure mixture of isomers of **4a**.

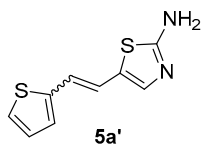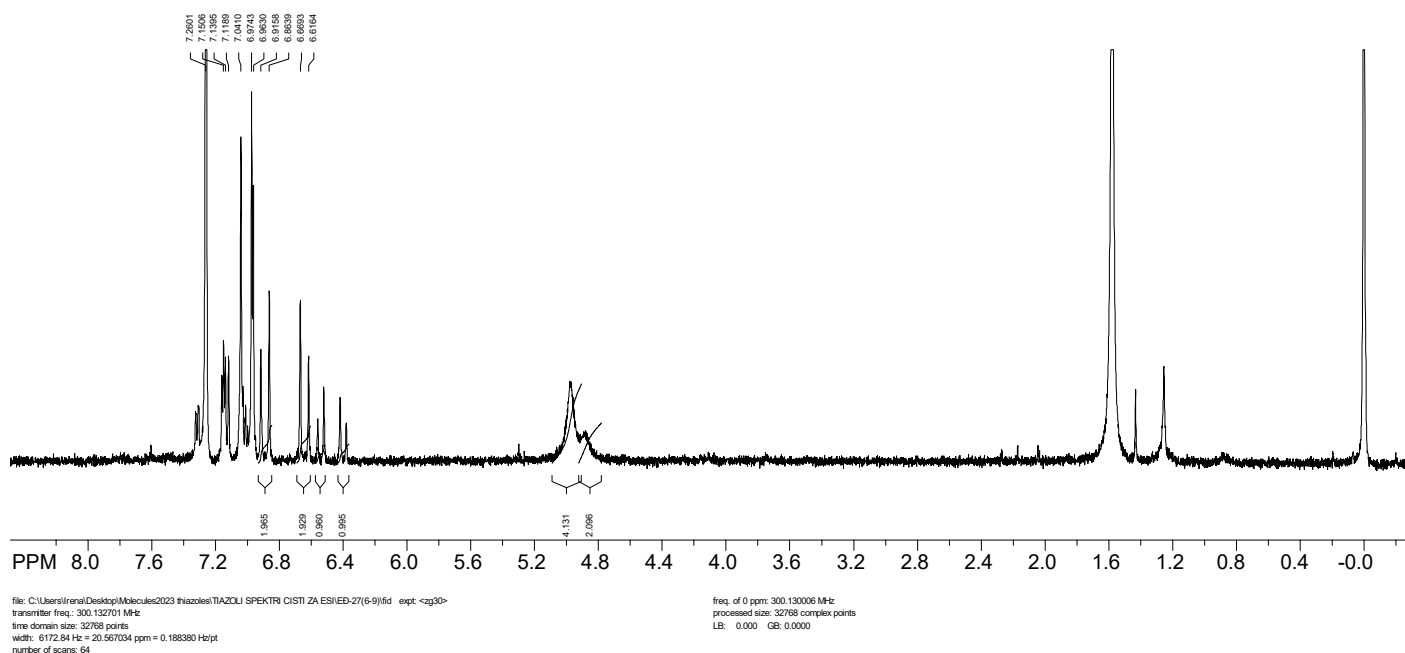

**Figure S23.** <sup>1</sup>H NMR spectrum (CDCl<sub>3</sub>) of the pure mixture of isomers of 5a'.

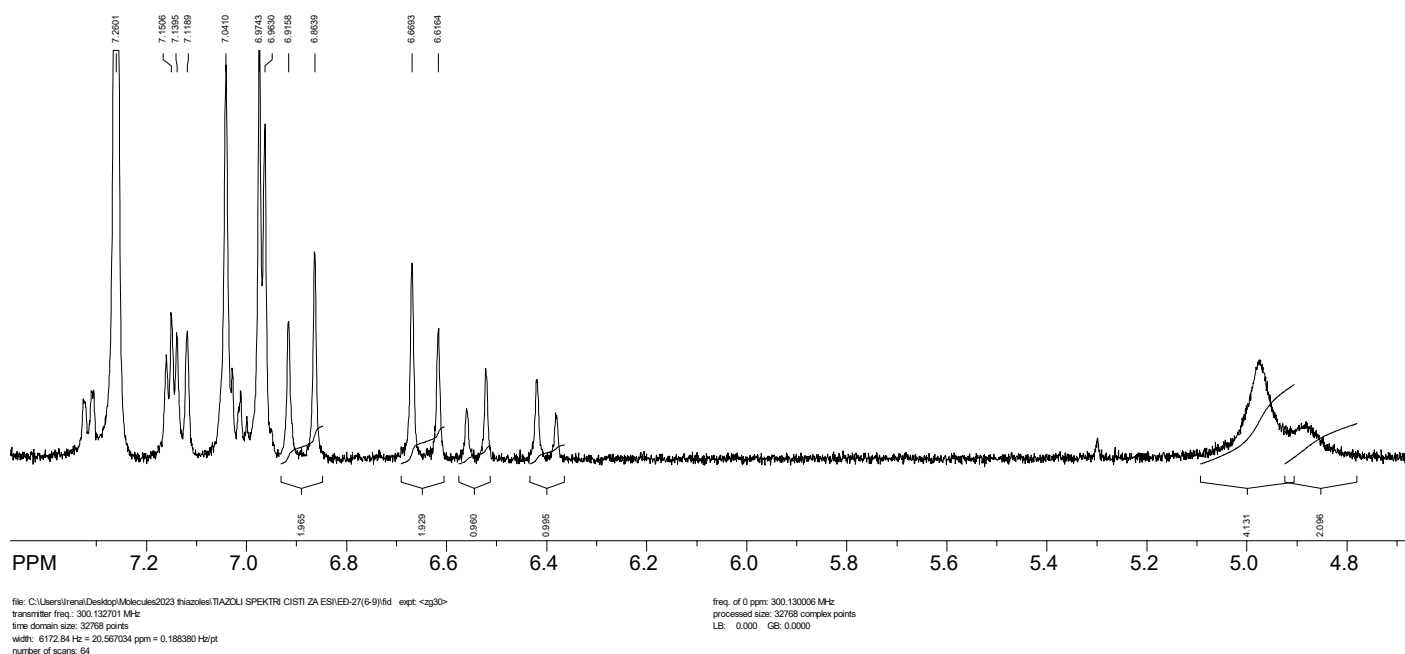

**Figure S24.** Aromatic part of the <sup>1</sup>H NMR spectrum (CDCl<sub>3</sub>) of the pure mixture of isomers of 5a'.

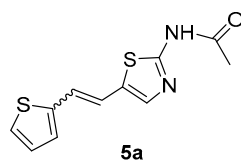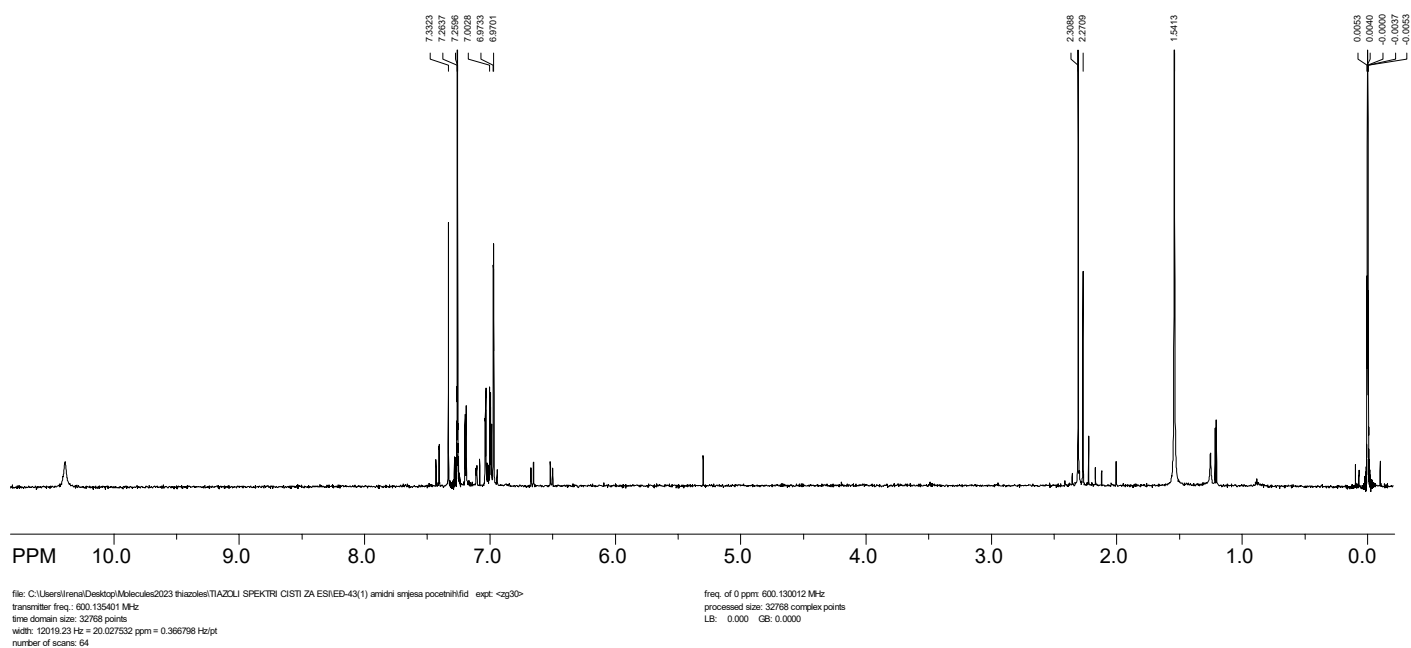

**Figure S25.**  $^1\text{H}$  NMR spectrum ( $\text{CDCl}_3$ ) of the pure mixture of isomers of **5a**.

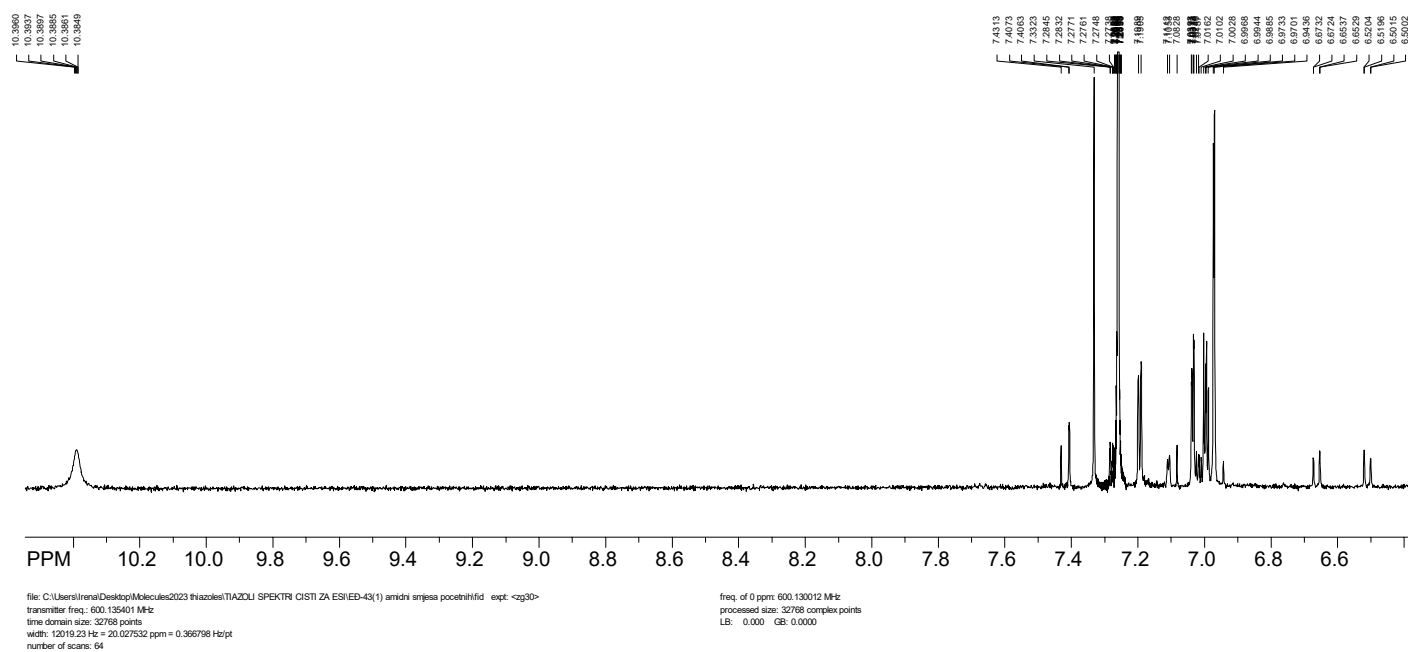

**Figure S26.** Aromatic part of the  $^1\text{H}$  NMR spectrum ( $\text{CDCl}_3$ ) of the pure mixture of isomers of **5a**.

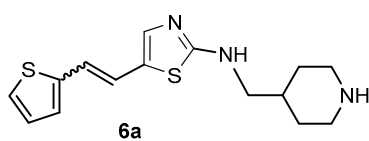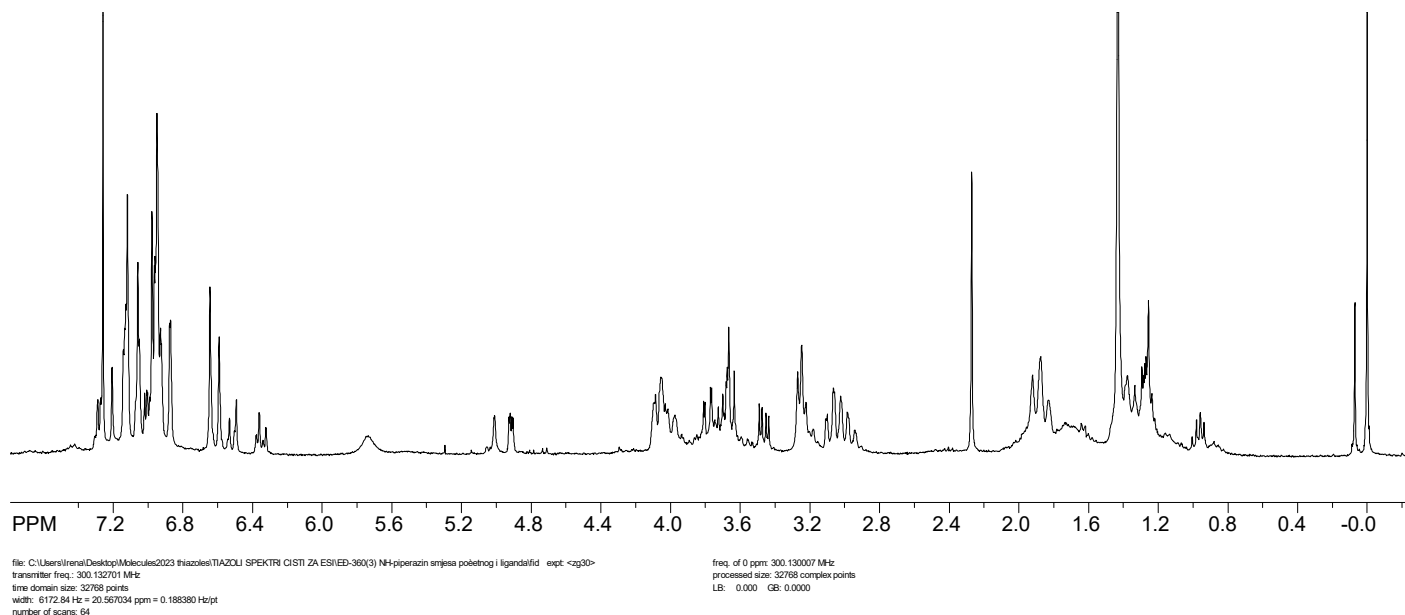

**Figure S27.**  $^1\text{H}$  NMR spectrum ( $\text{CDCl}_3$ ) of the mixture of isomers of **6a** and the catalyst.

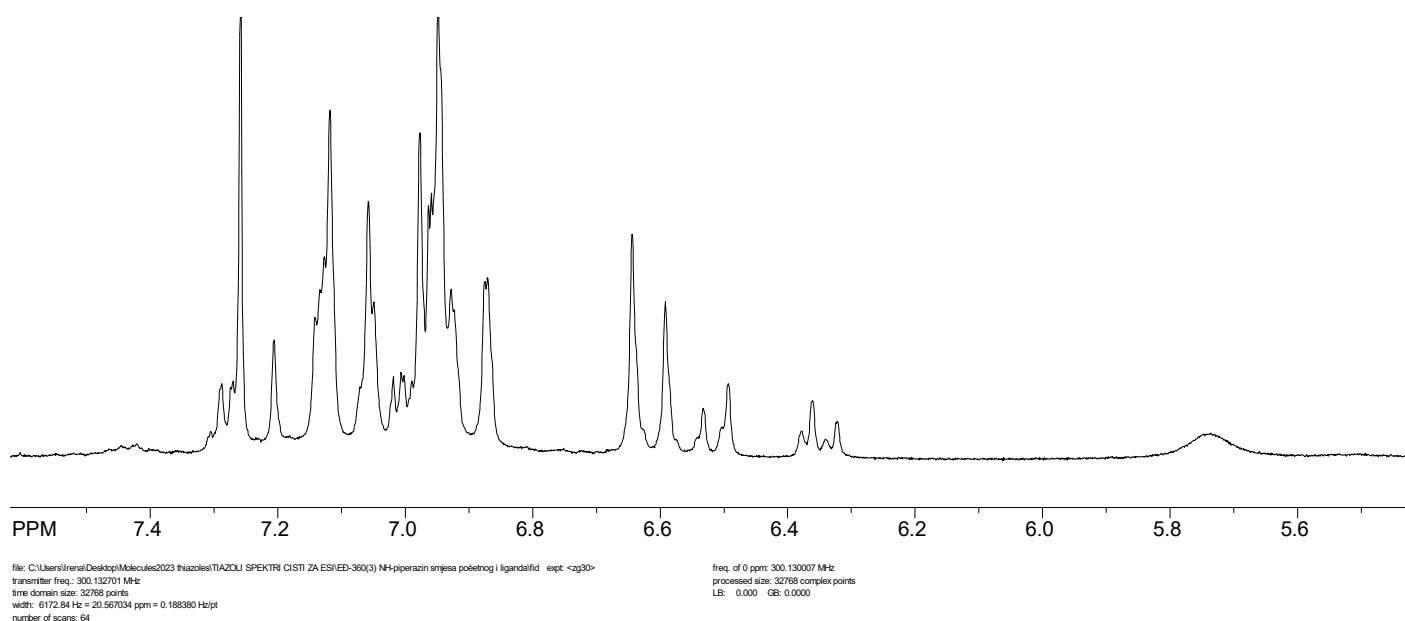

**Figure S28.** Aromatic part of the  $^1\text{H}$  NMR spectrum ( $\text{CDCl}_3$ ) of the mixture of isomers of **6a** and the catalyst.

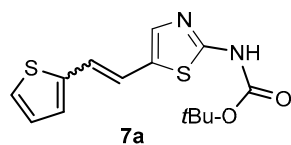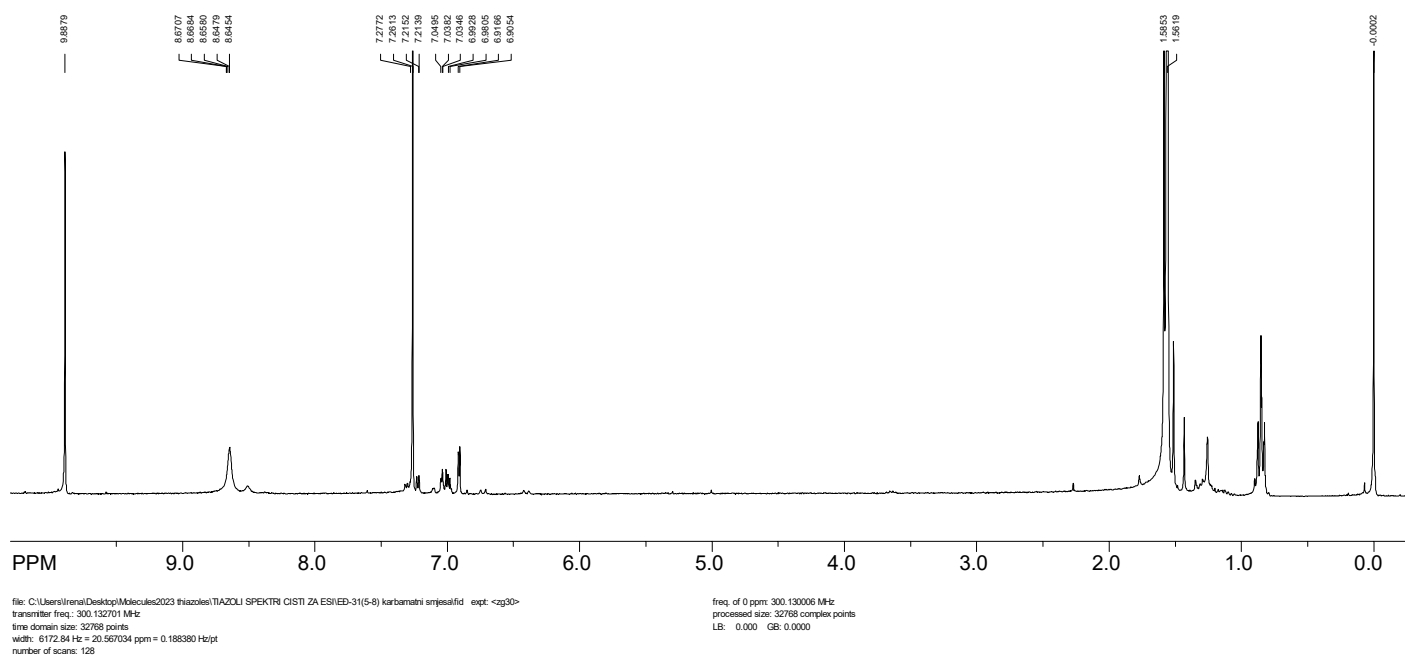

**Figure S29.**  $^1\text{H}$  NMR spectrum ( $\text{CDCl}_3$ ) of the mixture of isomers of **7a** and starting aldehyde.

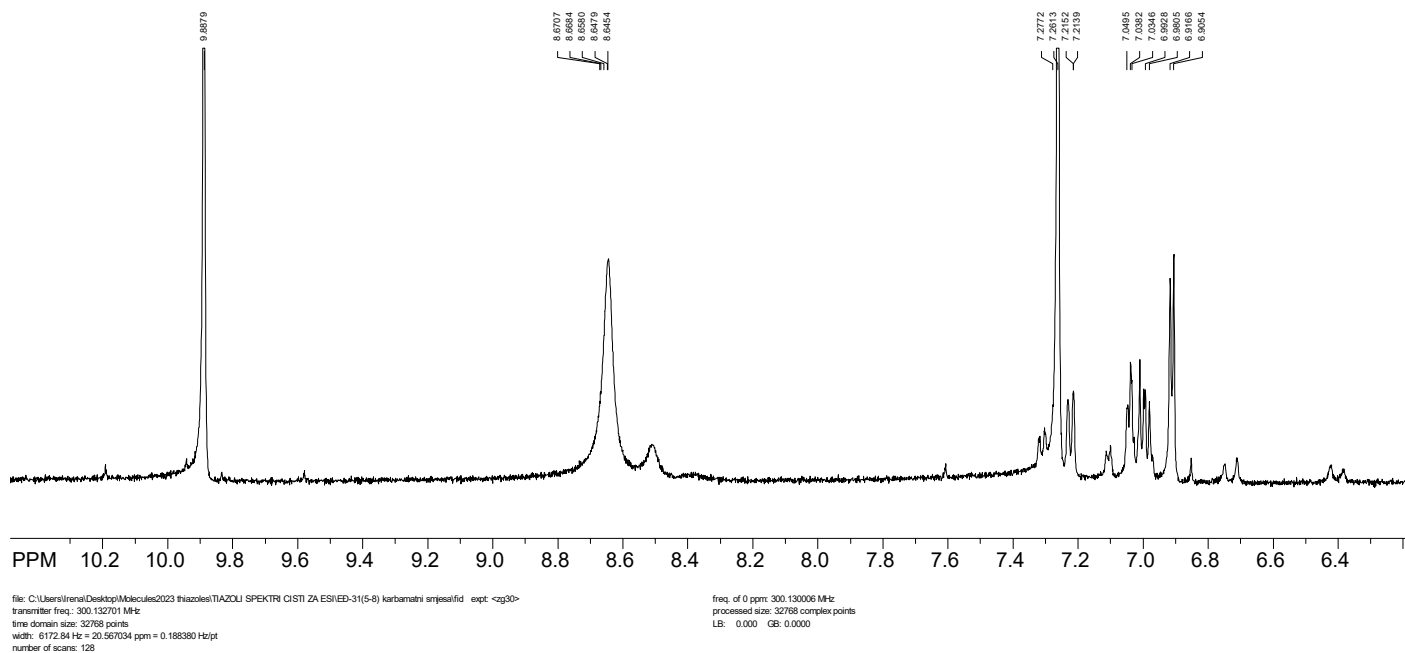

**Figure S30.** Aromatic part of the  $^1\text{H}$  NMR spectrum ( $\text{CDCl}_3$ ) of the mixture of isomers of **7a** and starting aldehyde.



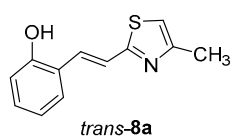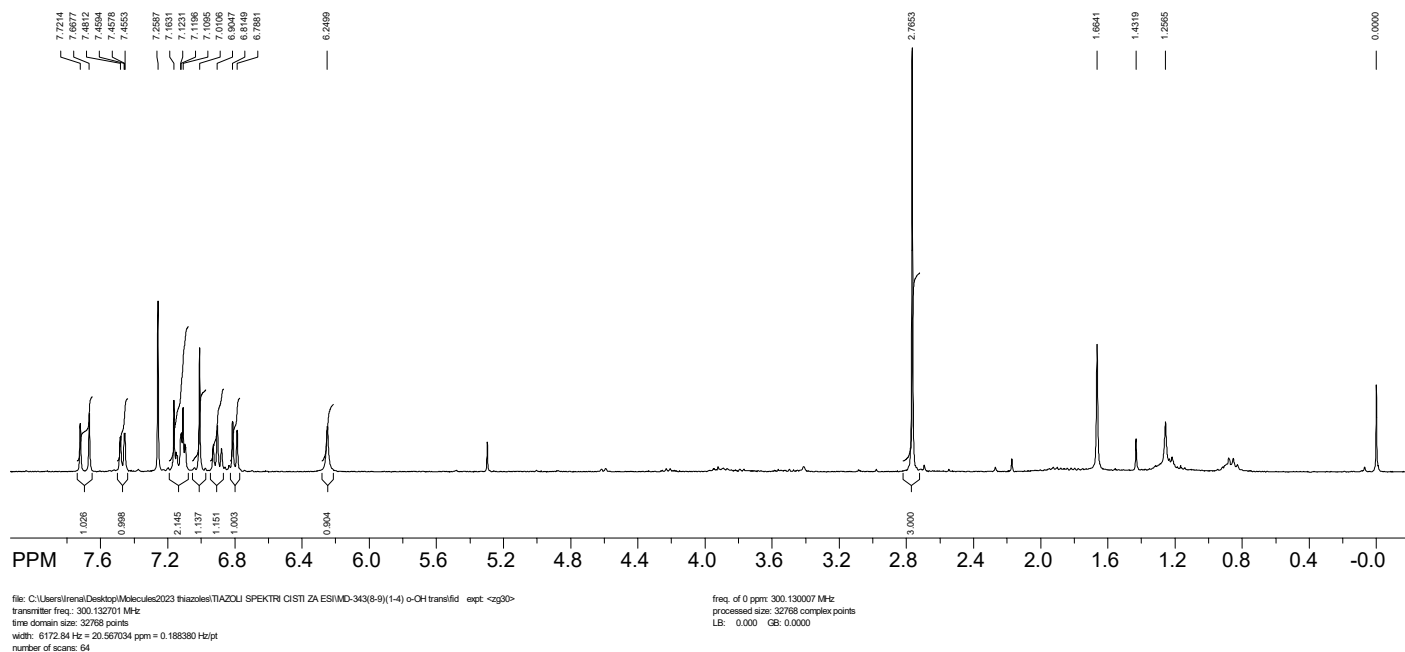

Figure S31.  $^1\text{H}$  NMR spectrum ( $\text{CDCl}_3$ ) of *trans*-8a.

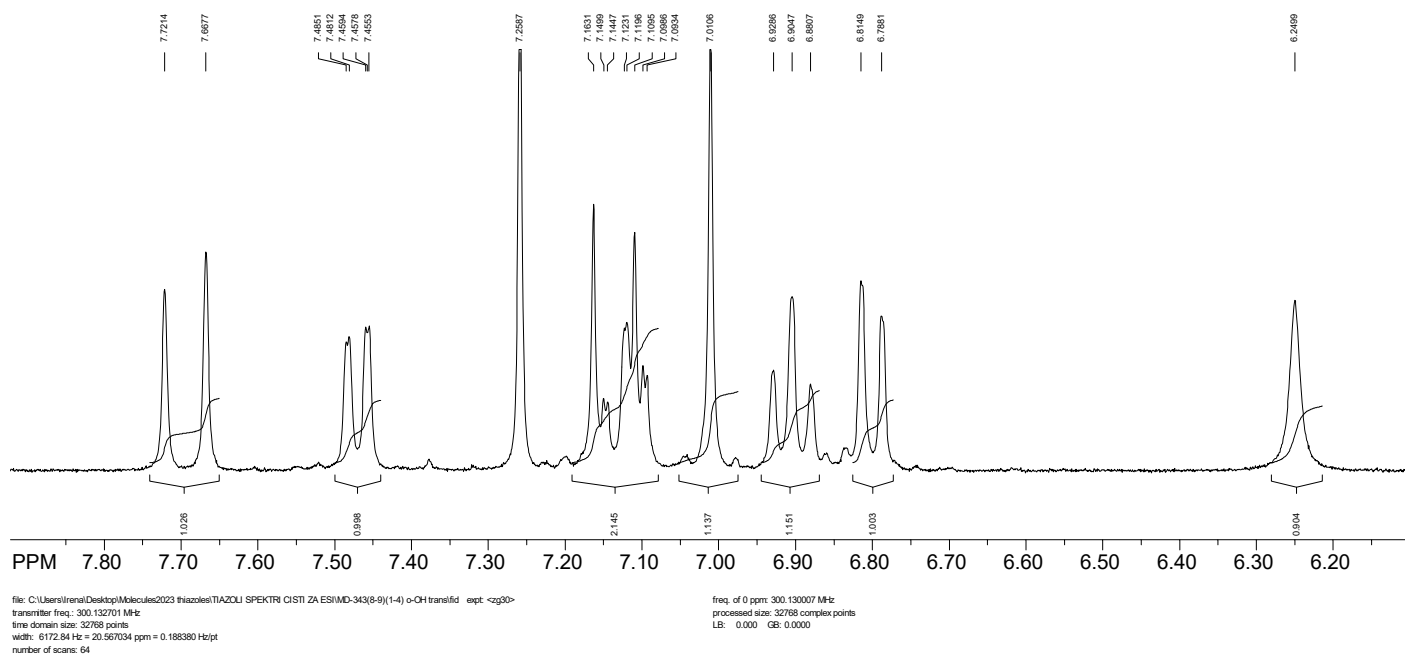

Figure S32. Aromatic part of the  $^1\text{H}$  NMR spectrum ( $\text{CDCl}_3$ ) of *trans*-8a.

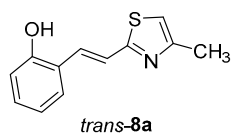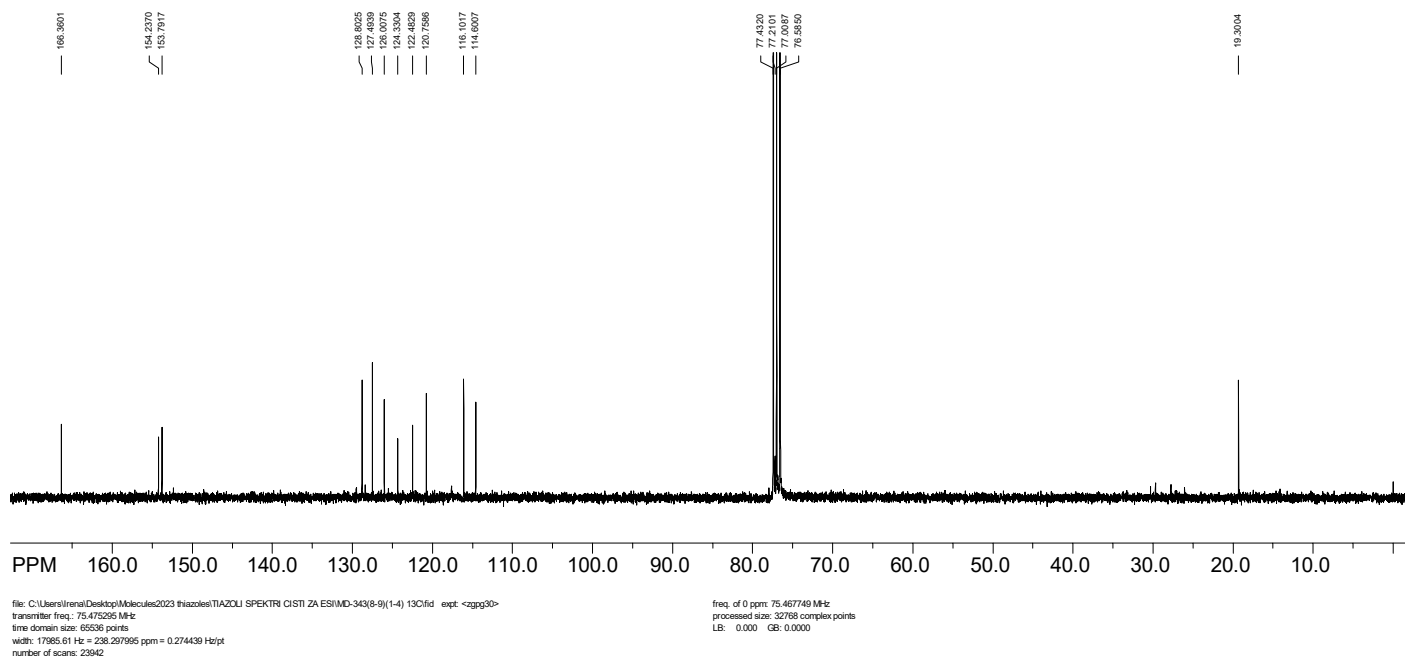

**Figure S33.**  $^{13}\text{C}$  NMR spectrum ( $\text{CDCl}_3$ ) of *trans*-8a.

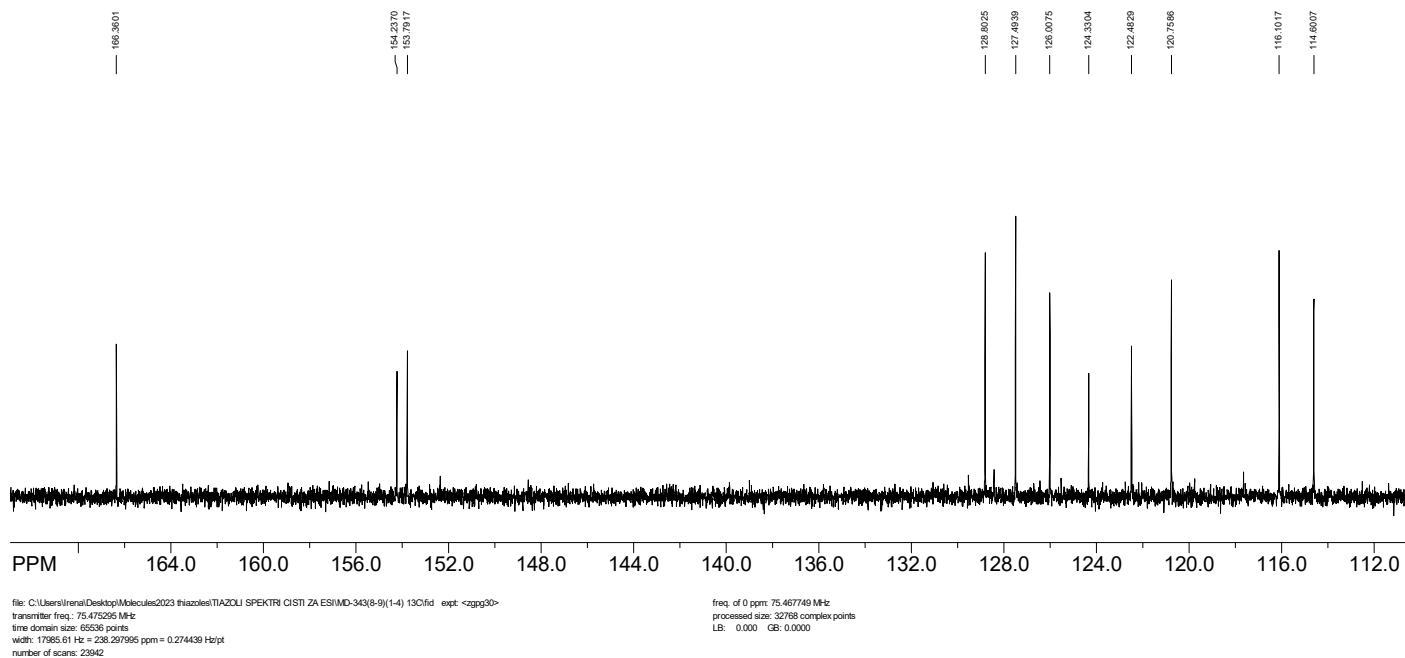

**Figure S34.** Aromatic part of the  $^{13}\text{C}$  NMR spectrum ( $\text{CDCl}_3$ ) of *trans*-8a.

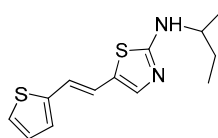

*trans-9a*

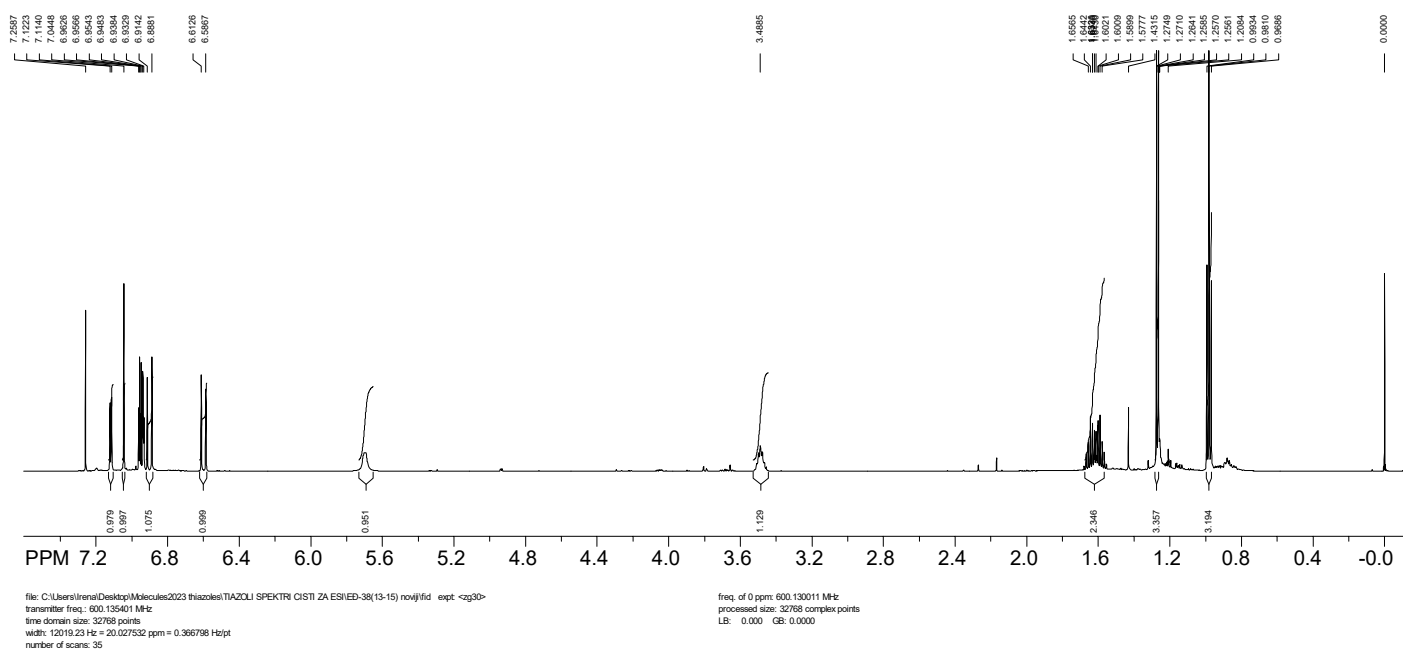

**Figure S35.**  $^1\text{H}$  NMR spectrum ( $\text{CDCl}_3$ ) of *trans-9a*.

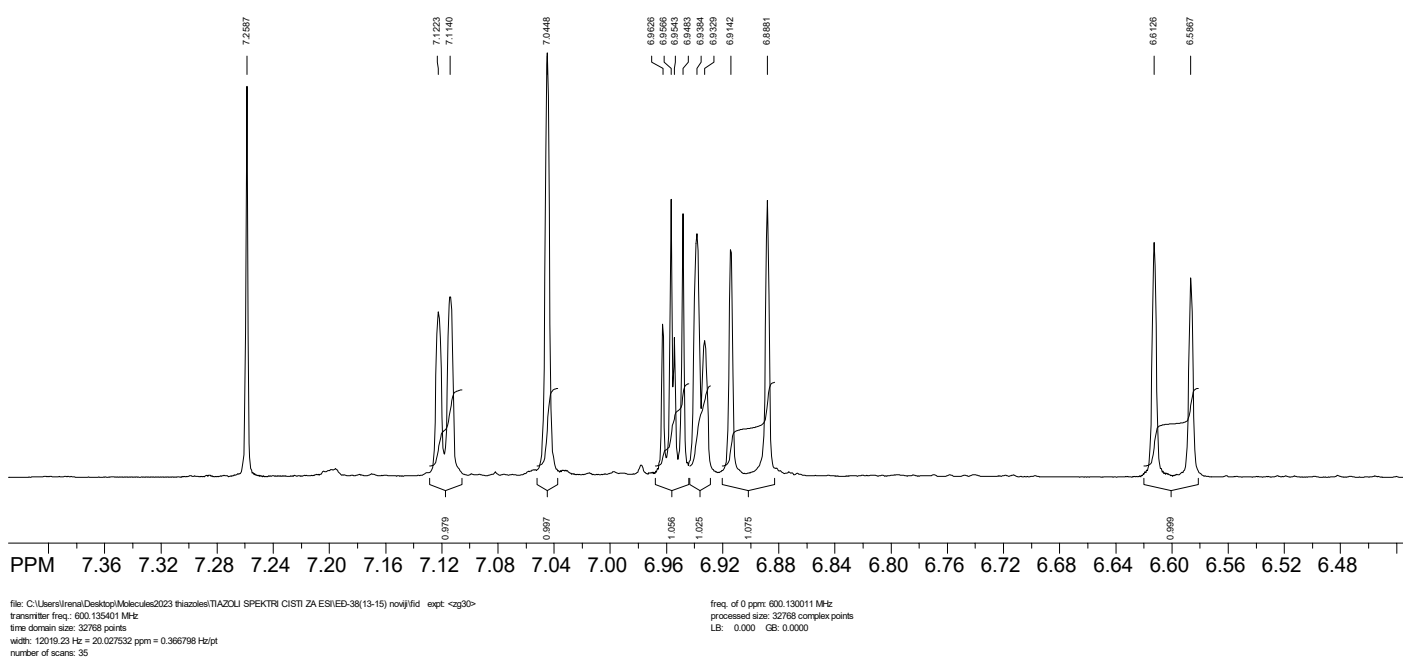

**Figure S36.** Aromatic part of the  $^1\text{H}$  NMR spectrum ( $\text{CDCl}_3$ ) of *trans-9a*.

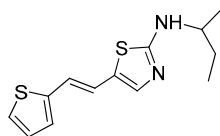

*trans-9a*

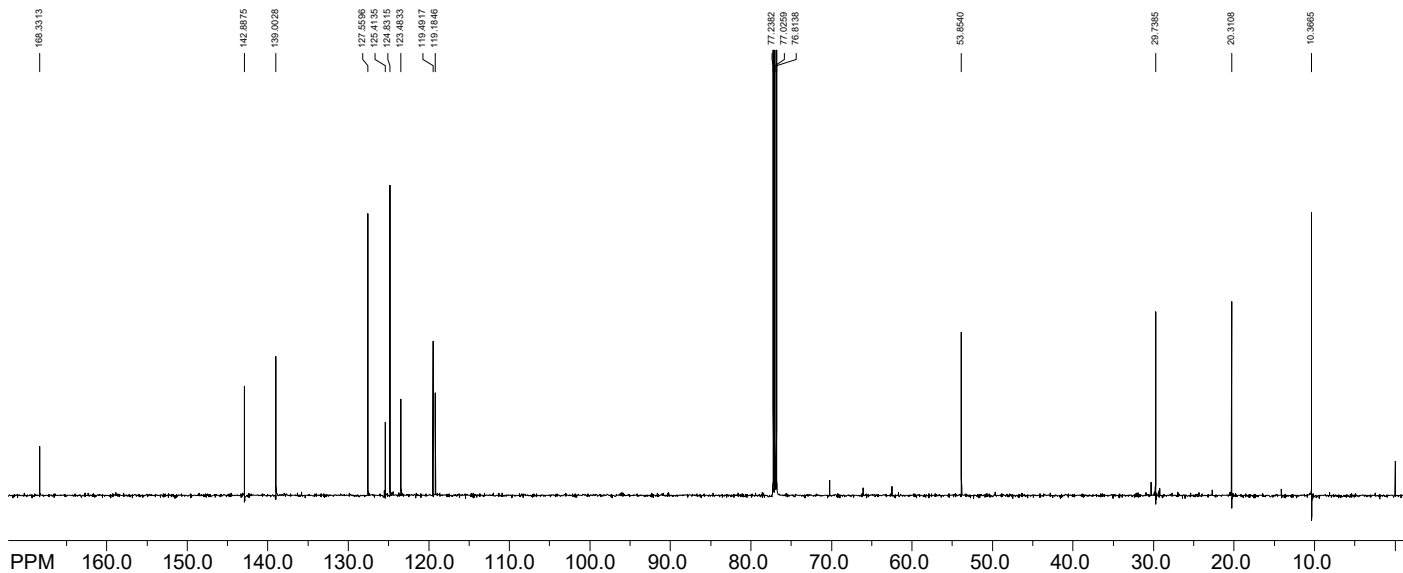

file: C:\Users\Irena\Desktop\Molecules2023\thiazoles\TIAZOLI SPEKTRI CISTI ZA ESRIED-38(13-15) 13Cfid exp: <ggg30>  
 transmitter freq.: 150.917899 MHz  
 time domain size: 65536 points  
 width: 35971.22 Hz = 238.349615 ppm = 0.548877 Hz/pt  
 number of scans: 6779

freq. of 0 ppm: 150.902809 MHz  
 processed size: 32768 complex points  
 LB: 0.000 GB: 0.0000

**Figure S37.**  $^{13}\text{C}$  NMR spectrum ( $\text{CDCl}_3$ ) of *trans-9a*.

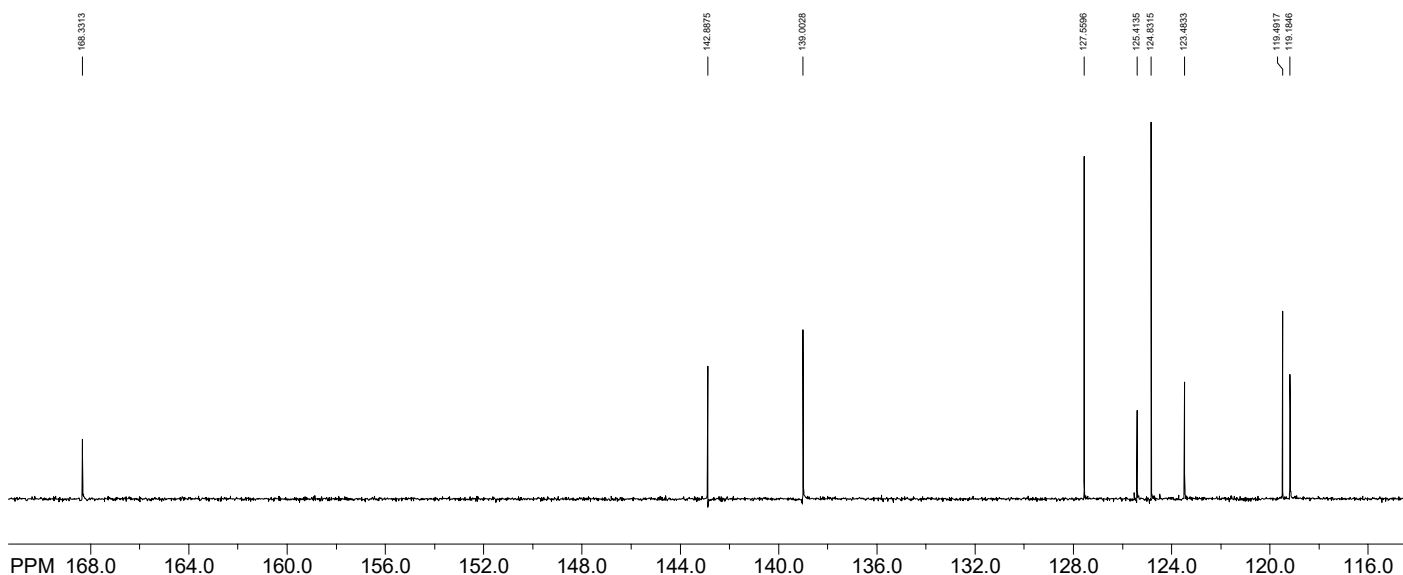

file: C:\Users\Irena\Desktop\Molecules2023\thiazoles\TIAZOLI SPEKTRI CISTI ZA ESRIED-38(13-15) 13Cfid exp: <ggg30>  
 transmitter freq.: 150.917899 MHz  
 time domain size: 65536 points  
 width: 35971.22 Hz = 238.349615 ppm = 0.548877 Hz/pt  
 number of scans: 6779

freq. of 0 ppm: 150.902809 MHz  
 processed size: 32768 complex points  
 LB: 0.000 GB: 0.0000

**Figure S38.** Aromatic part of the  $^{13}\text{C}$  NMR spectrum ( $\text{CDCl}_3$ ) of *trans-9a*.

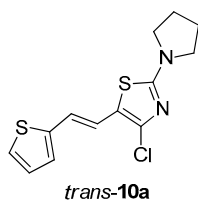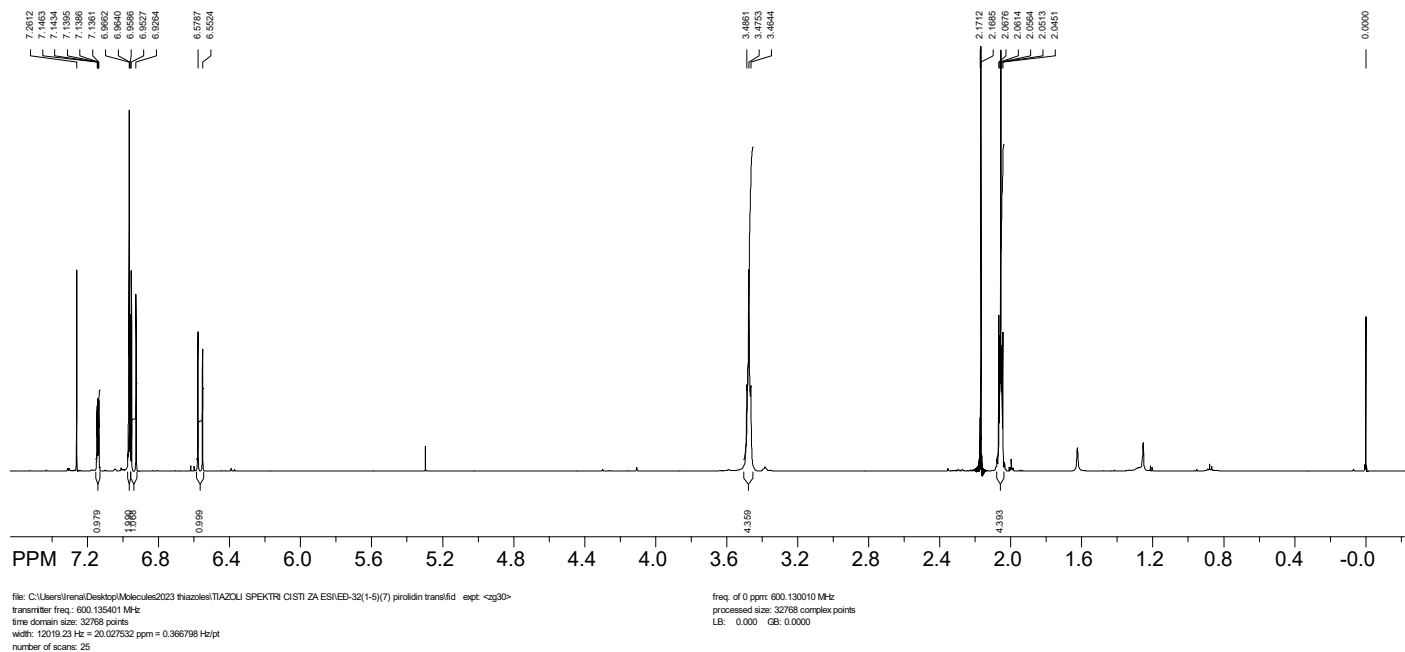

Figure S39.  $^1\text{H}$  NMR spectrum ( $\text{CDCl}_3$ ) of *trans*-10a.

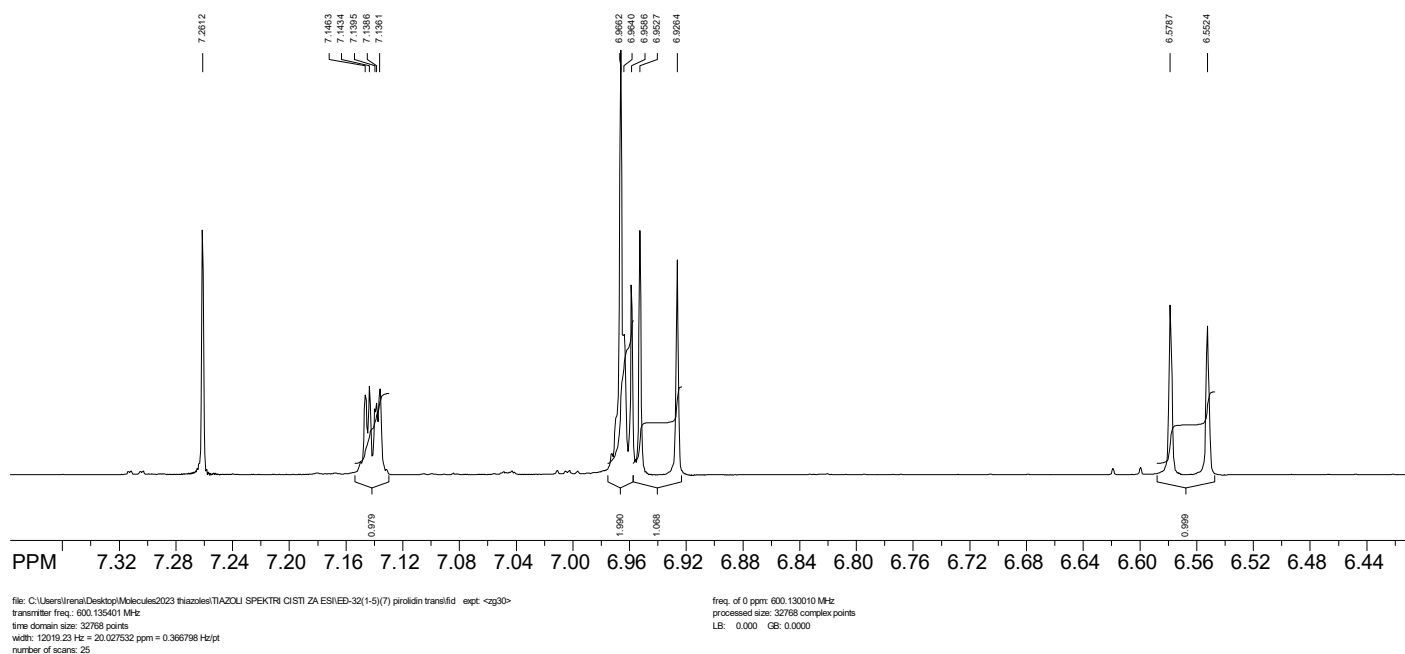

Figure S40. Aromatic part of the  $^1\text{H}$  NMR spectrum ( $\text{CDCl}_3$ ) of *trans*-10a.

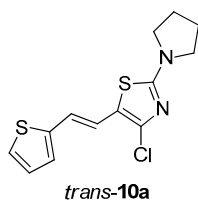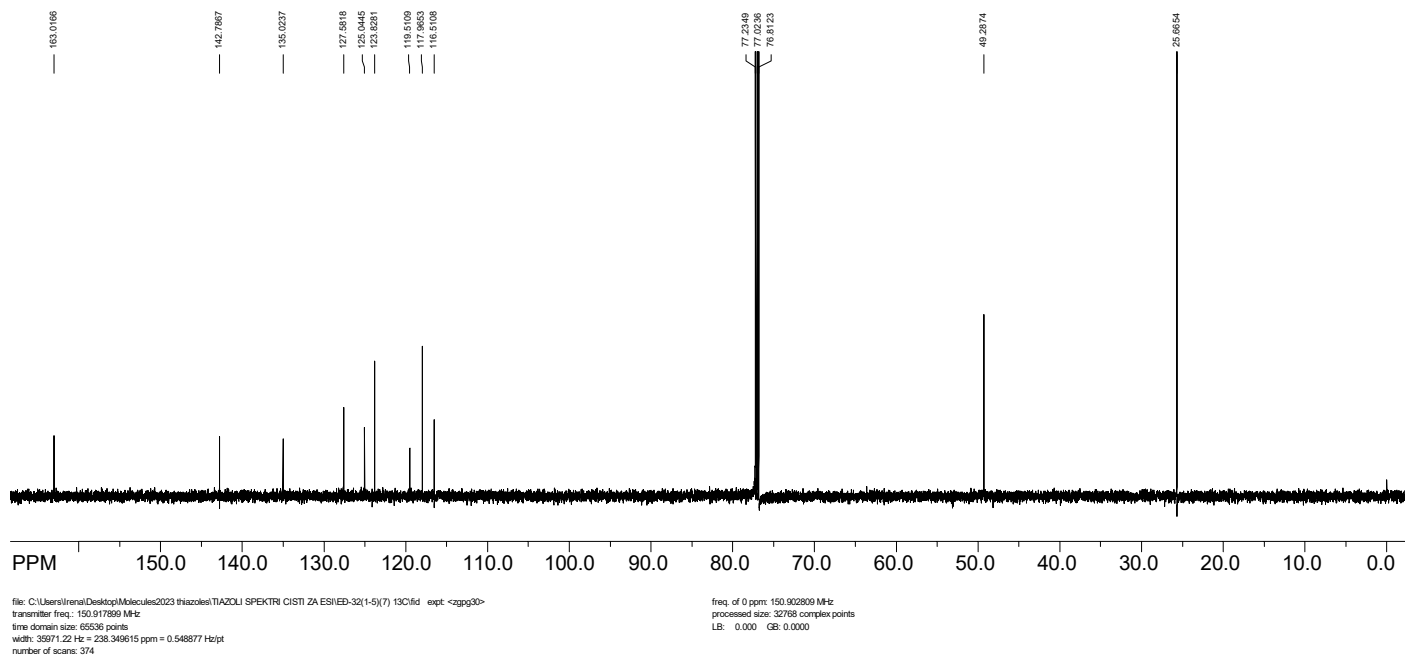

**Figure S41.**  $^{13}\text{C}$  NMR spectrum ( $\text{CDCl}_3$ ) of *trans*-10a.

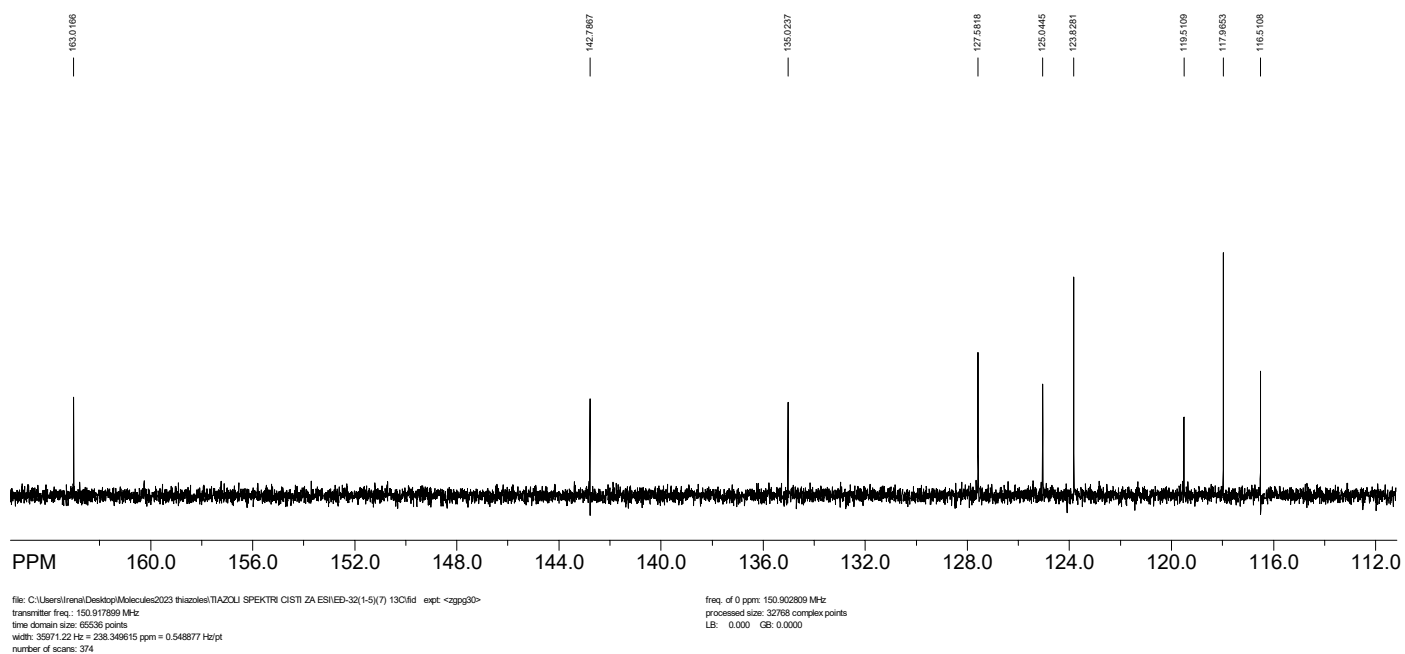

**Figure S42.** Aromatic part of the  $^{13}\text{C}$  NMR spectrum ( $\text{CDCl}_3$ ) of *trans*-10a.

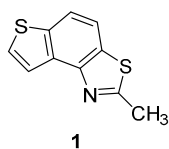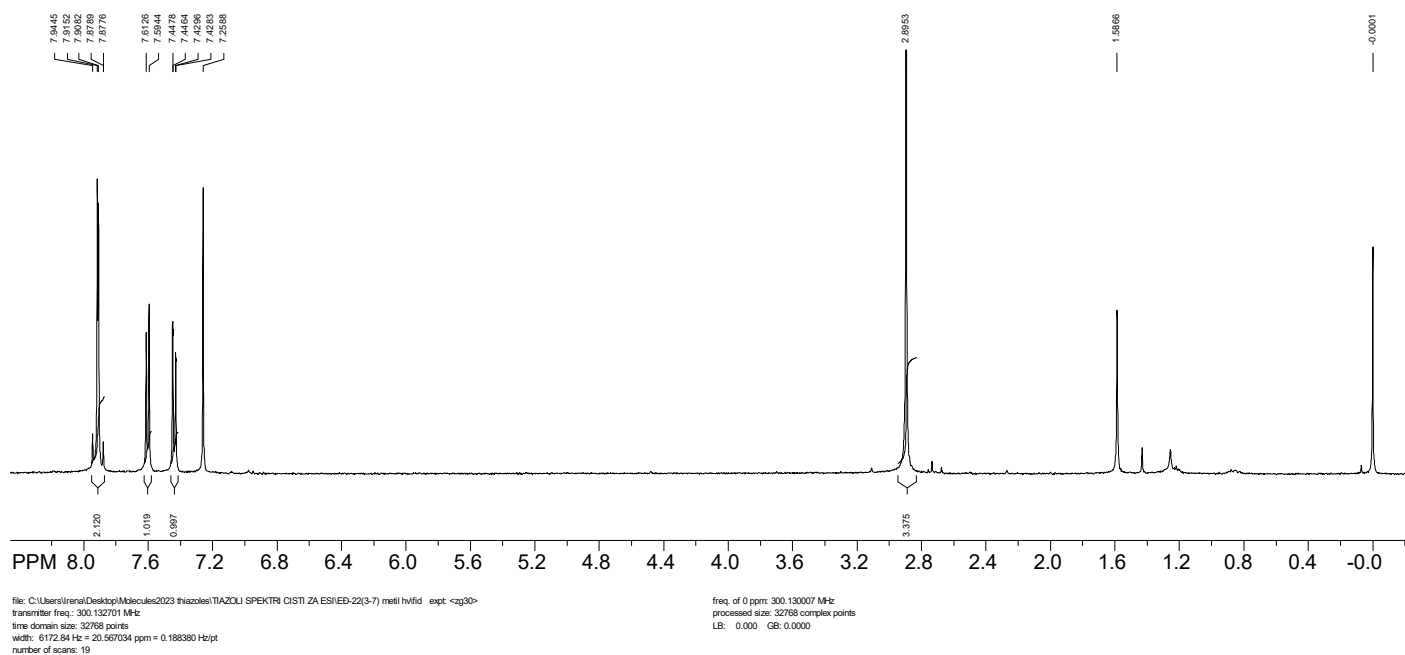

Figure S43.  $^1\text{H}$  NMR spectrum ( $\text{CDCl}_3$ ) of **1**.

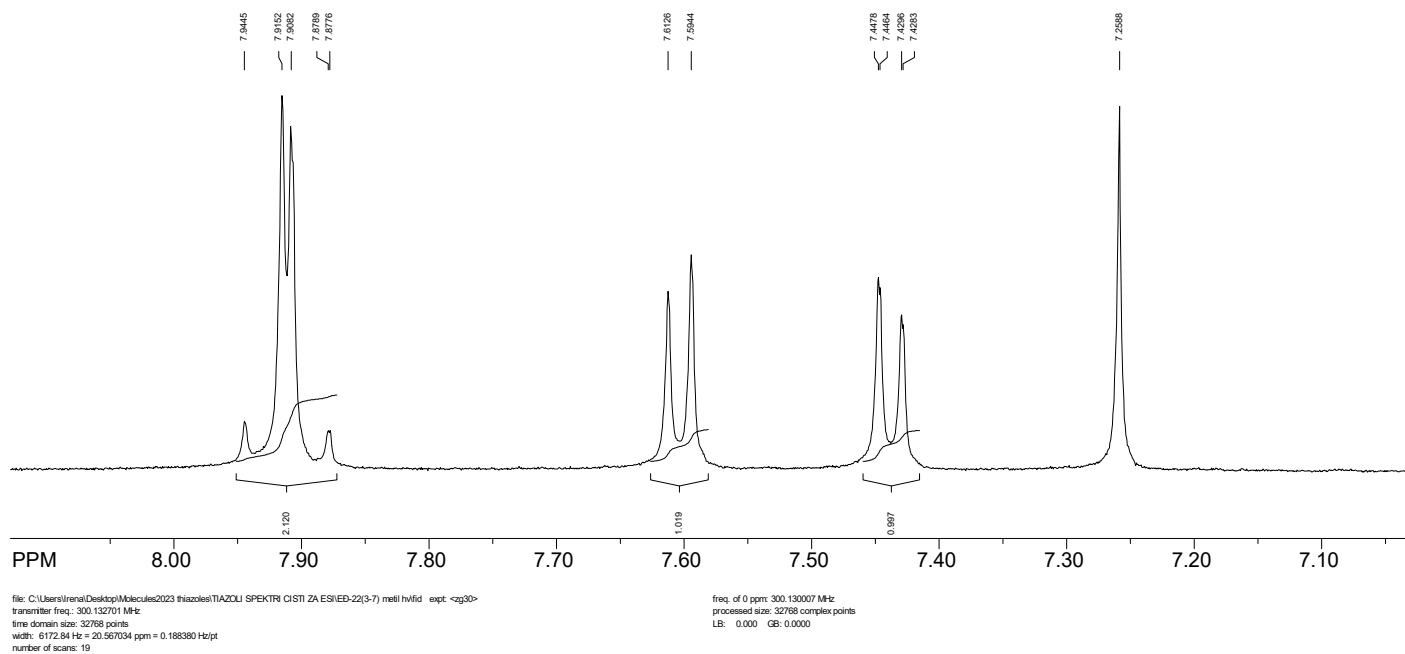

Figure S44. Aromatic part of the  $^1\text{H}$  NMR spectrum ( $\text{CDCl}_3$ ) of **1**.

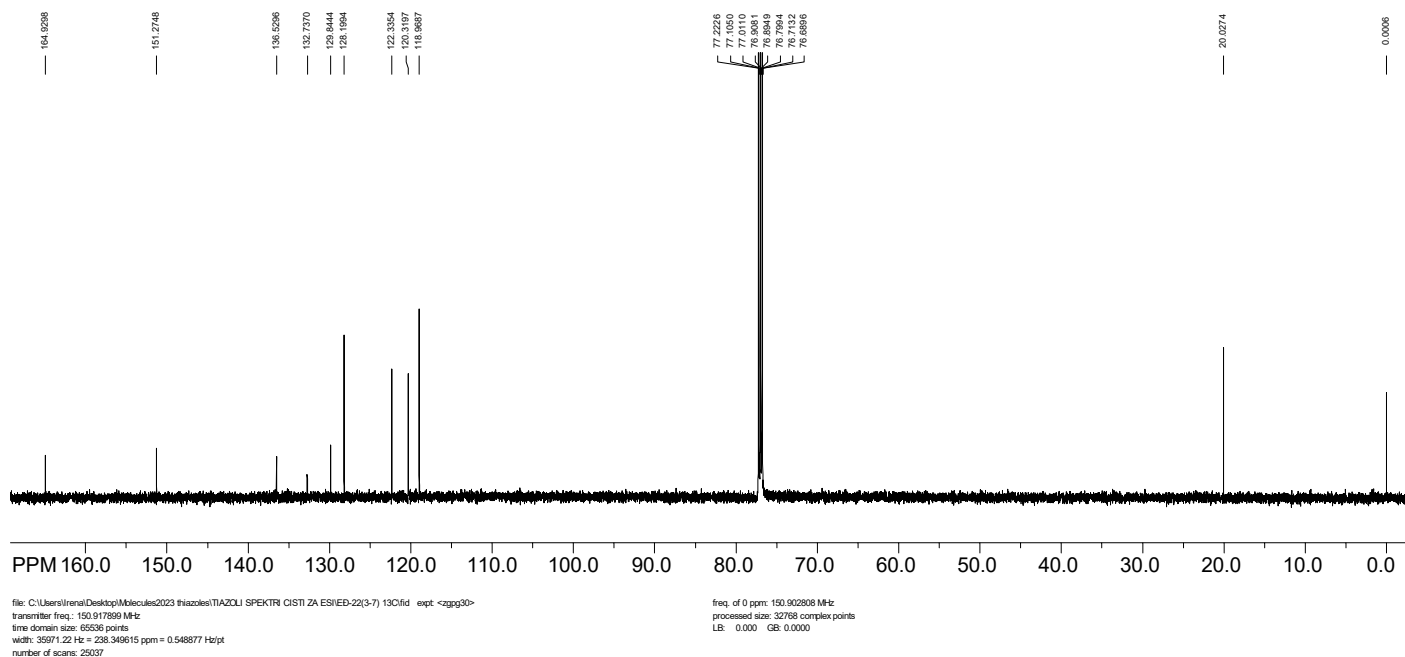

Figure S45. <sup>13</sup>C NMR spectrum (CDCl<sub>3</sub>) of 1.

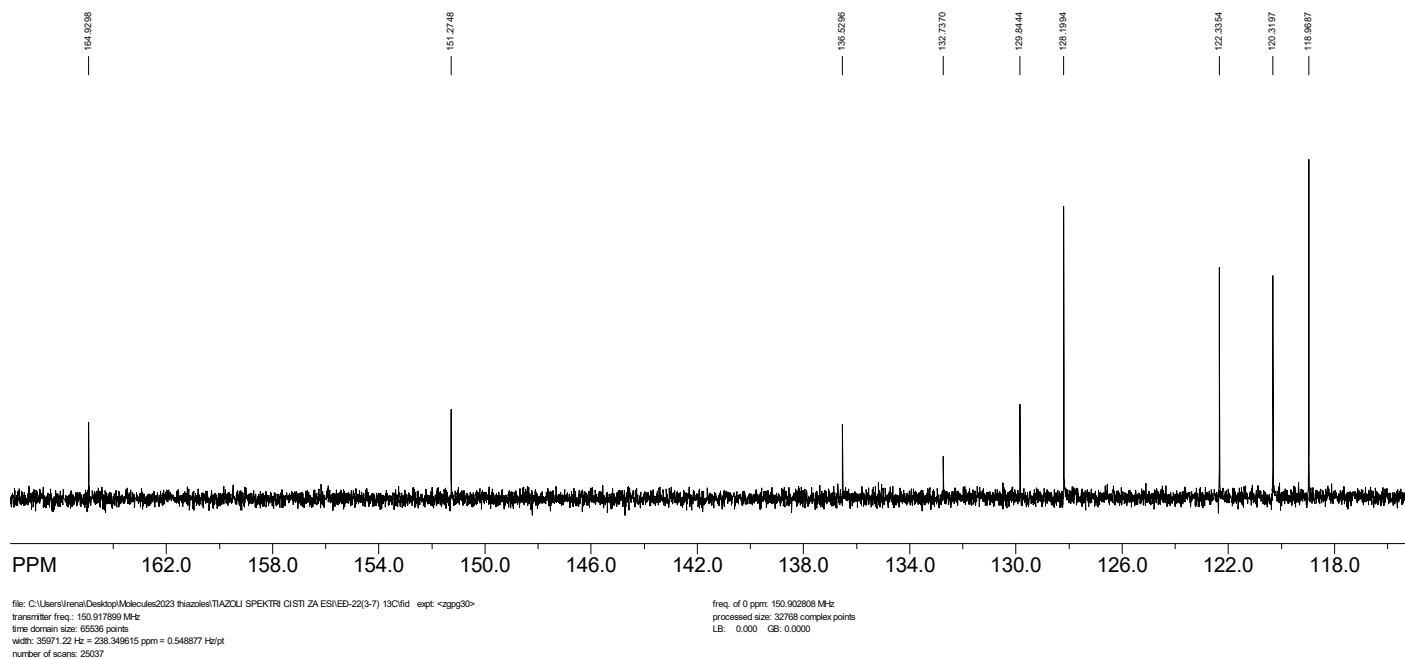

Figure S46. Aromatic part of the <sup>13</sup>C NMR spectrum (CDCl<sub>3</sub>) of 1.



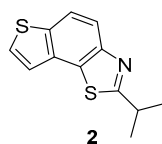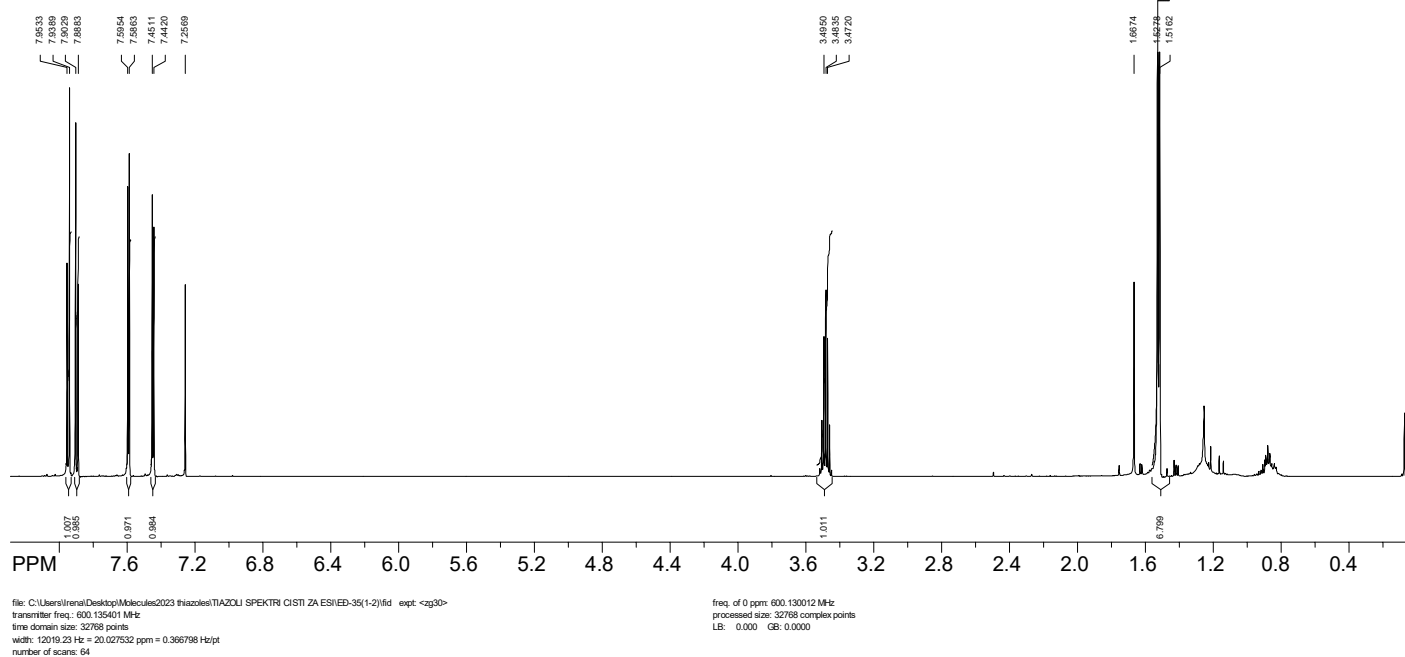

**Figure S47.**  $^1\text{H}$  NMR spectrum ( $\text{CDCl}_3$ ) of **2**.

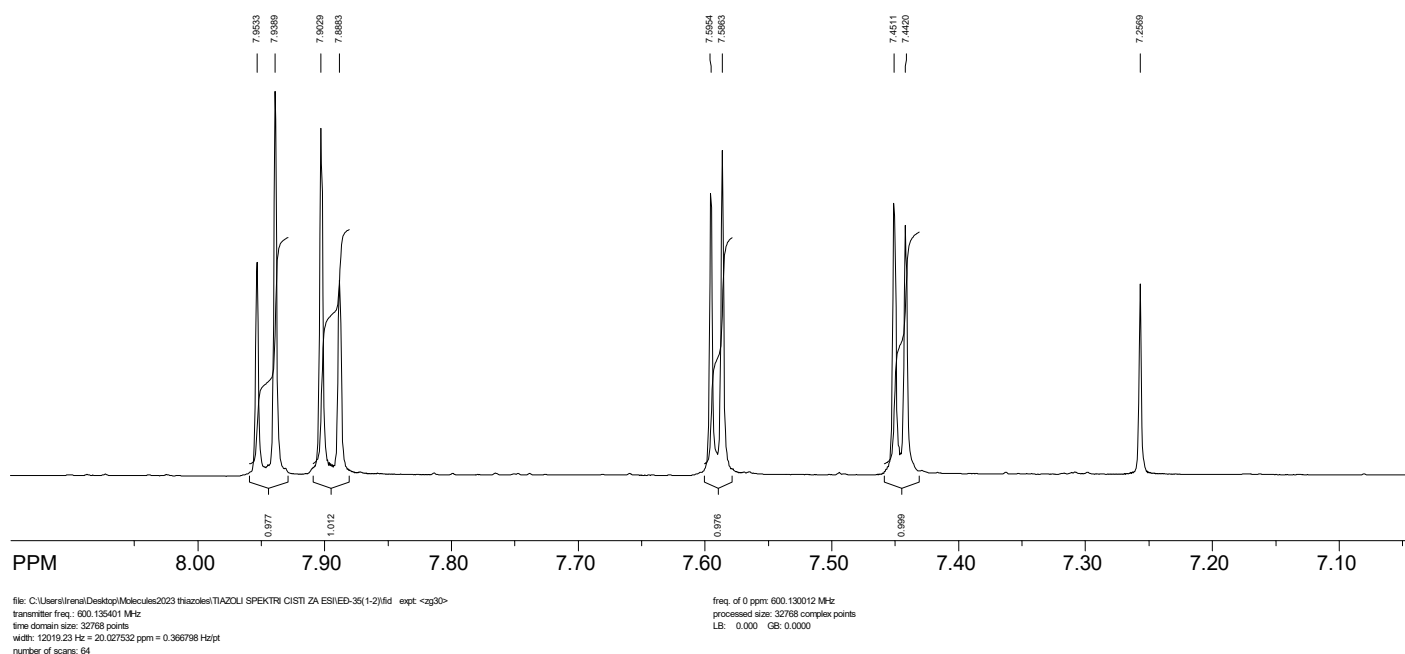

**Figure S48.** Aromatic part of the  $^1\text{H}$  NMR spectrum ( $\text{CDCl}_3$ ) of **2**.

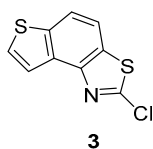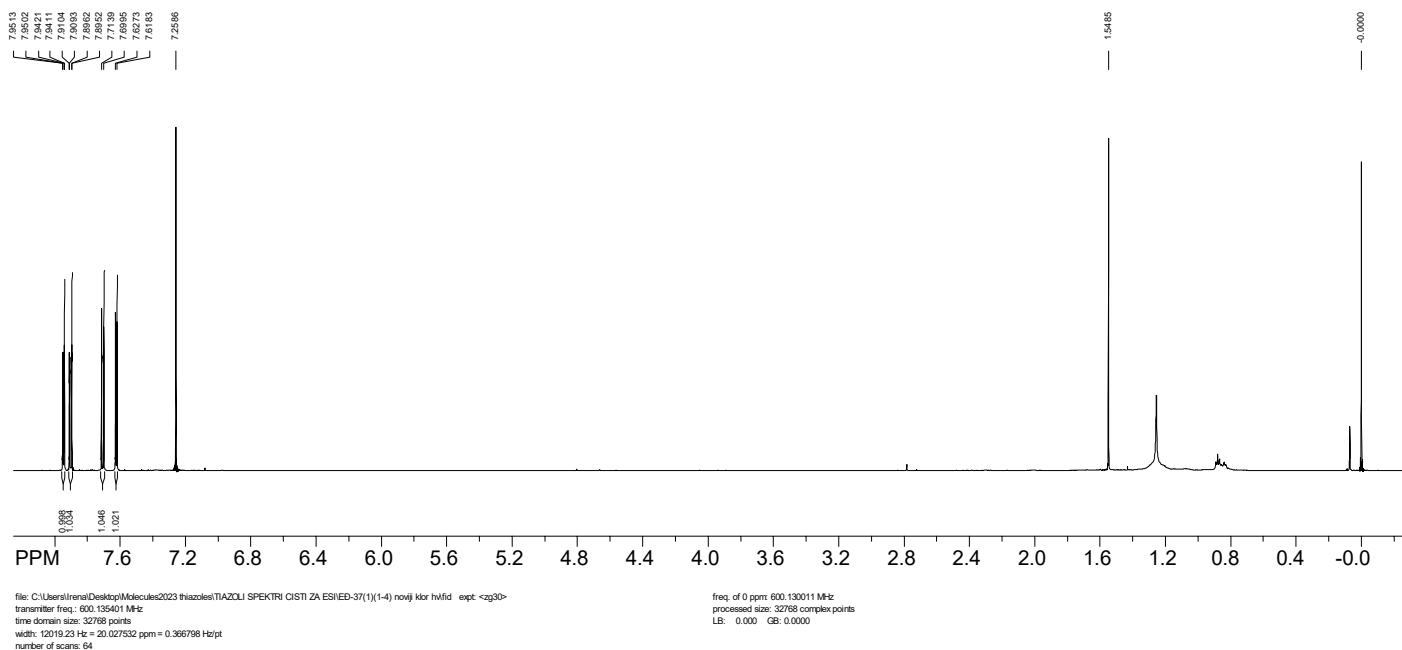

**Figure S49.**  $^1\text{H}$  NMR spectrum ( $\text{CDCl}_3$ ) of **3**.

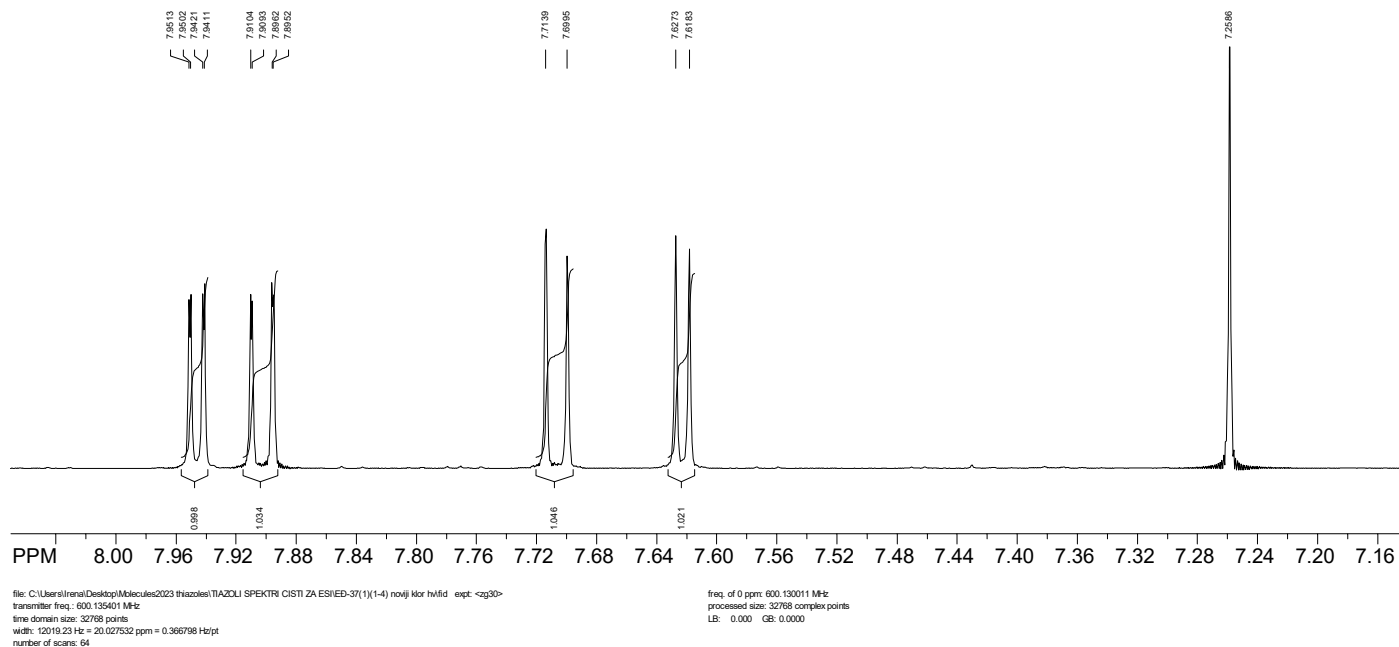

**Figure S50.** Aromatic part of the  $^1\text{H}$  NMR spectrum ( $\text{CDCl}_3$ ) of **3**.

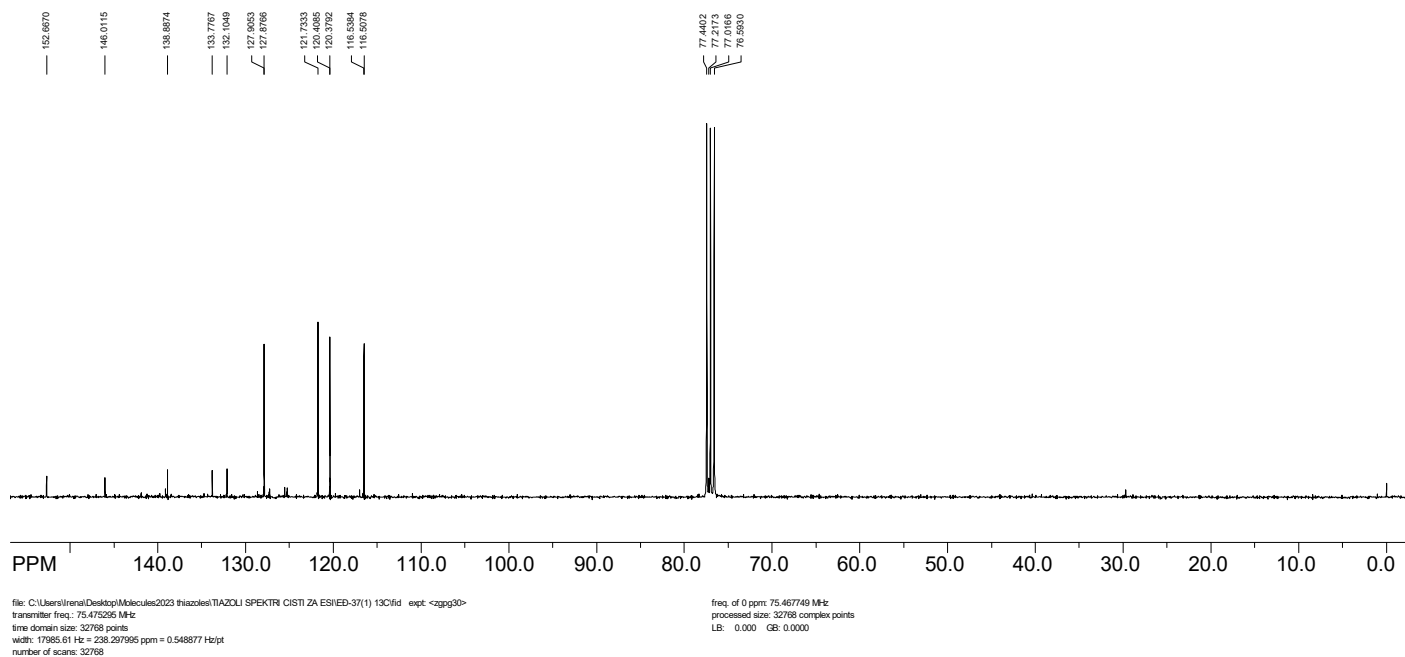

**Figure S51.**  $^{13}\text{C}$  NMR spectrum ( $\text{CDCl}_3$ ) of **3**.

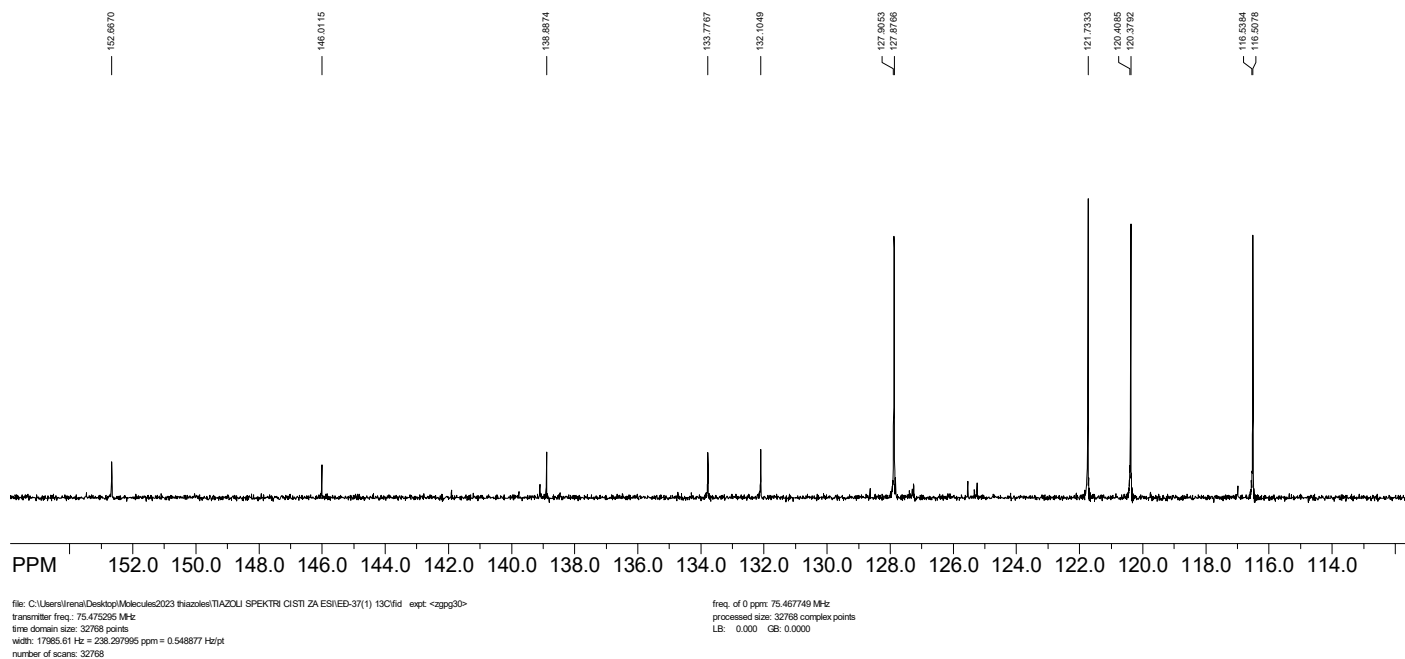

**Figure S52.** Aromatic part of the  $^{13}\text{C}$  NMR spectrum ( $\text{CDCl}_3$ ) of **3**.

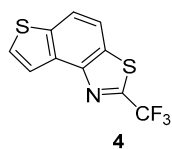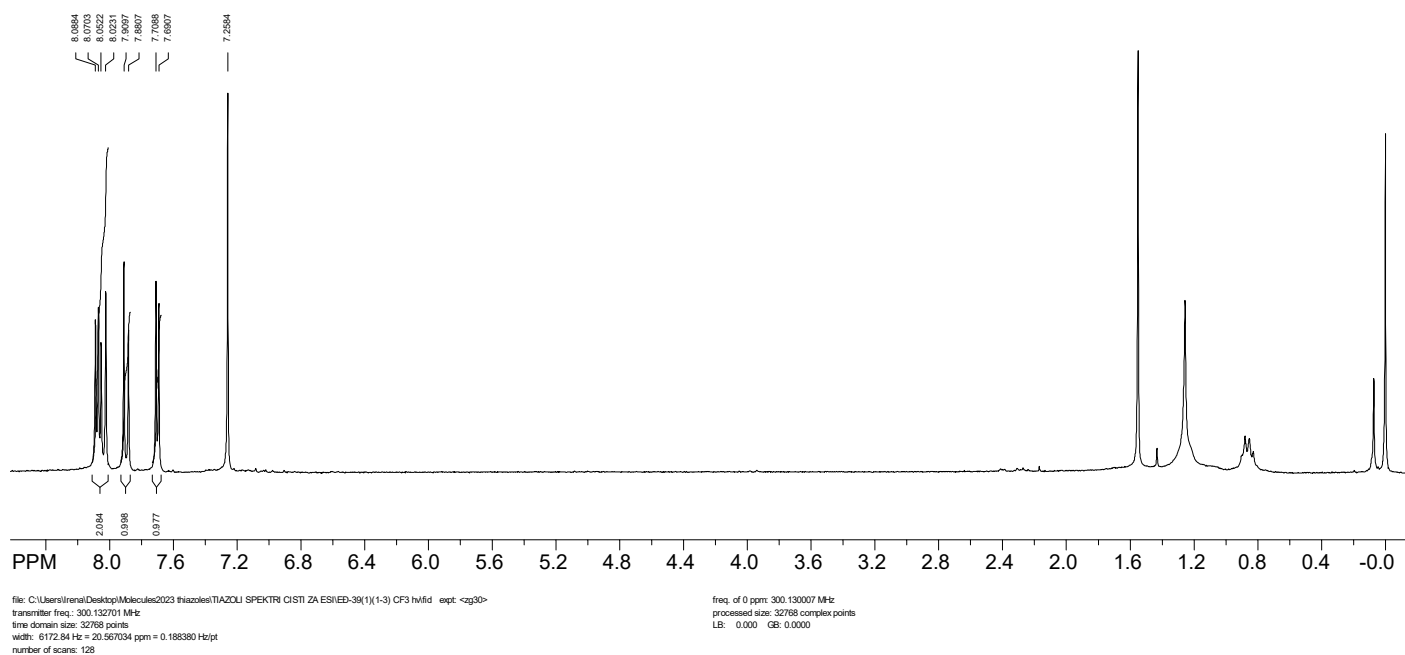

**Figure S53.**  $^1\text{H}$  NMR spectrum ( $\text{CDCl}_3$ ) of **4**.

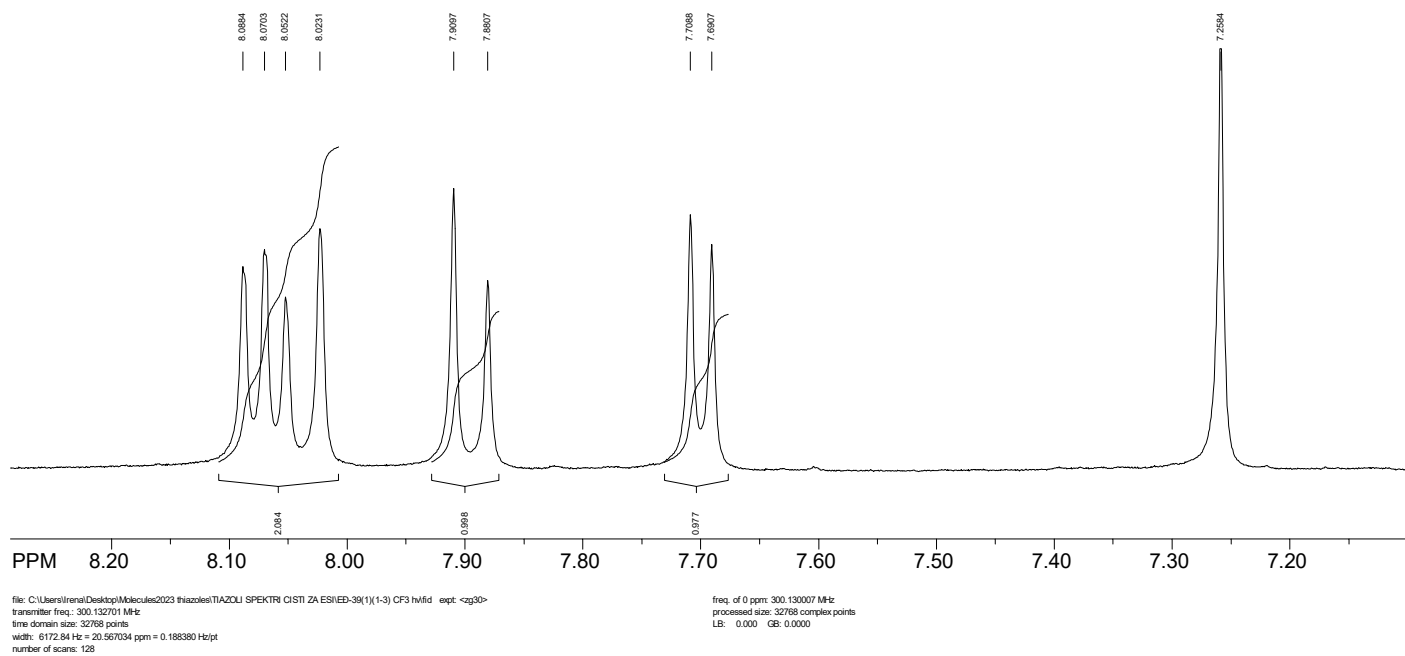

**Figure S54.** Aromatic part of the  $^1\text{H}$  NMR spectrum ( $\text{CDCl}_3$ ) of **4**.

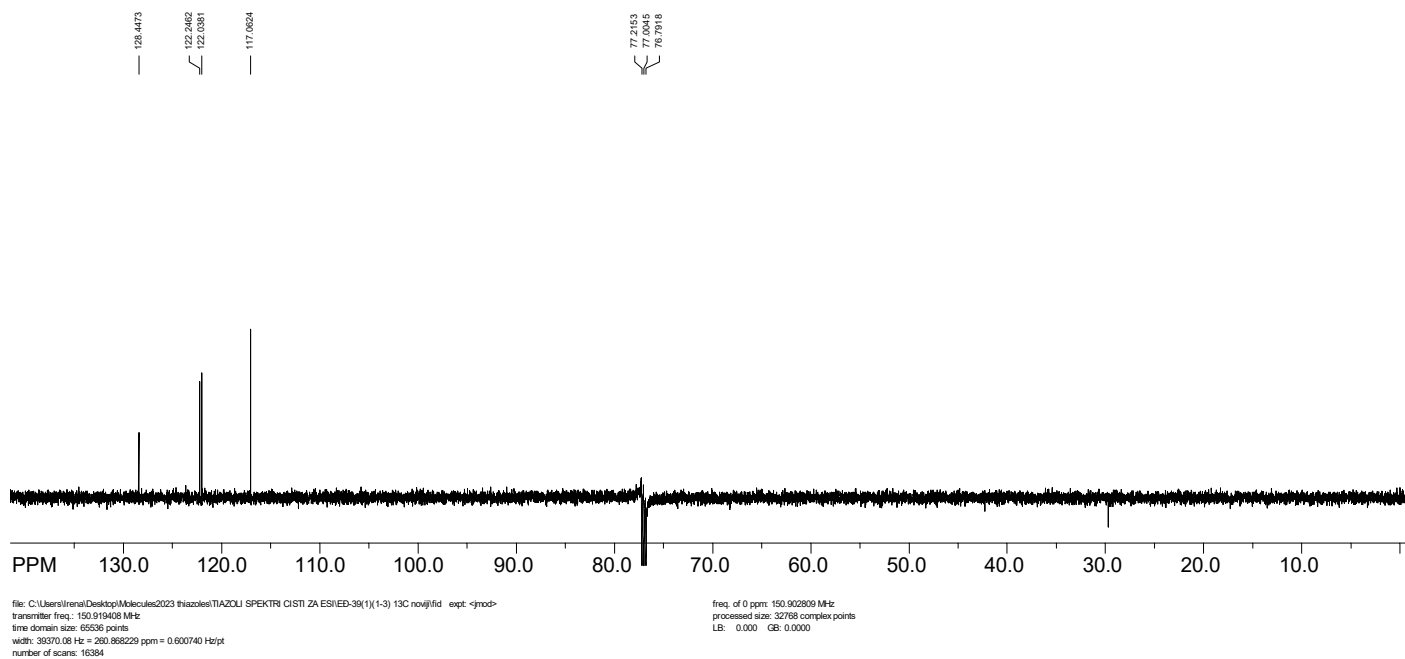

**Figure S55.**  $^{13}\text{C}$  NMR (APT) spectrum ( $\text{CDCl}_3$ ) of **4**.

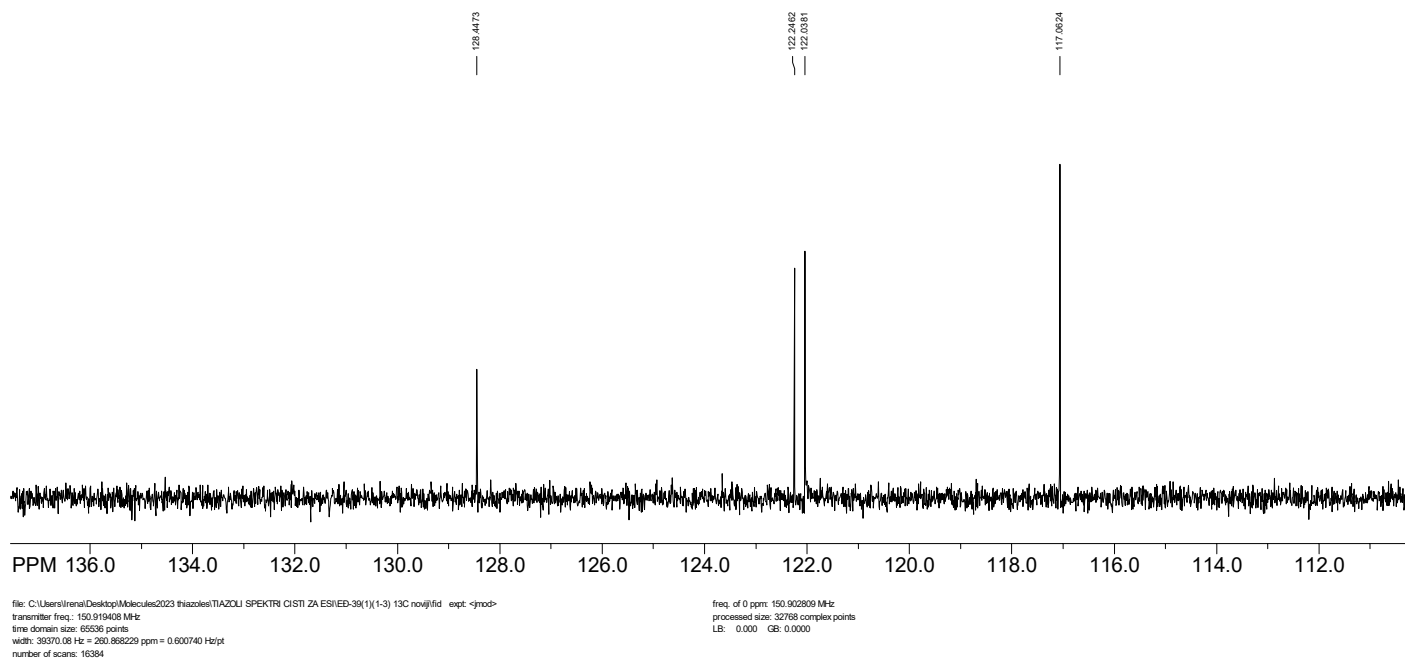

**Figure S56.** Aromatic part of the  $^{13}\text{C}$  NMR (APT) spectrum ( $\text{CDCl}_3$ ) of **4**.

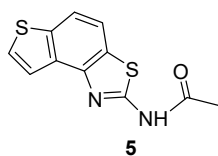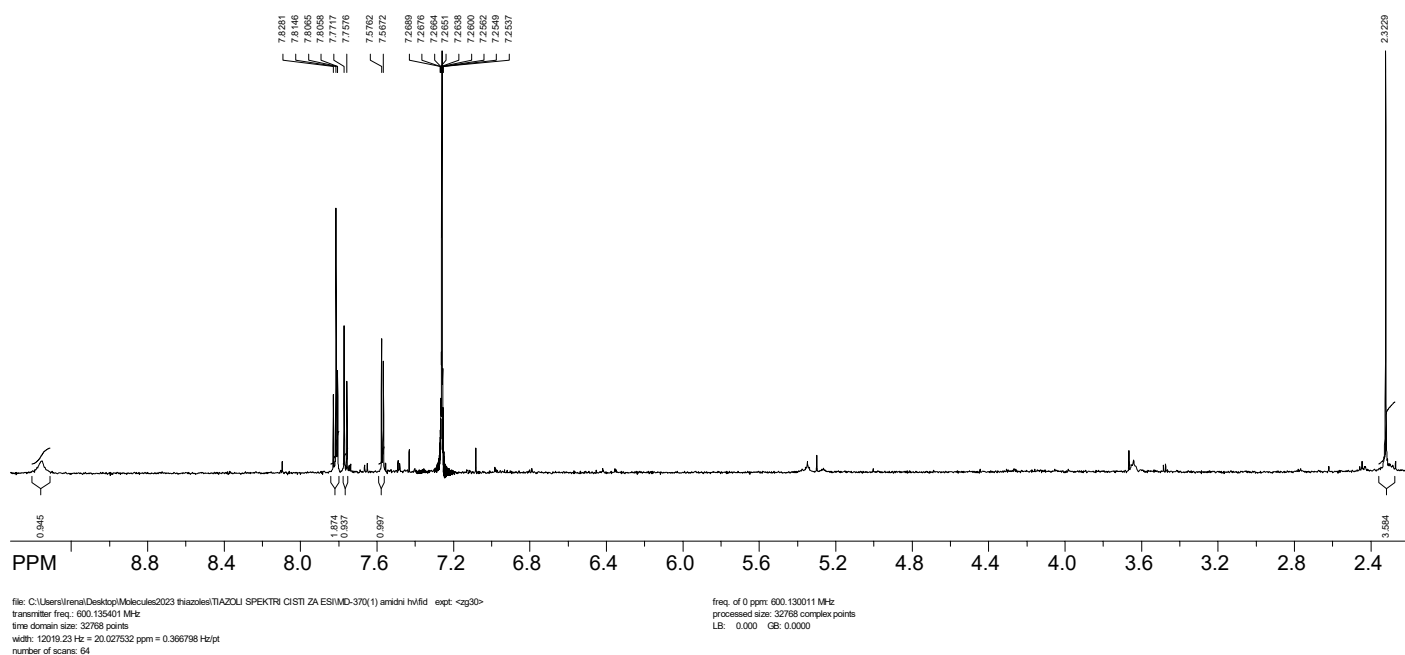

**Figure S57.**  $^1\text{H}$  NMR spectrum ( $\text{CDCl}_3$ ) of **5**.

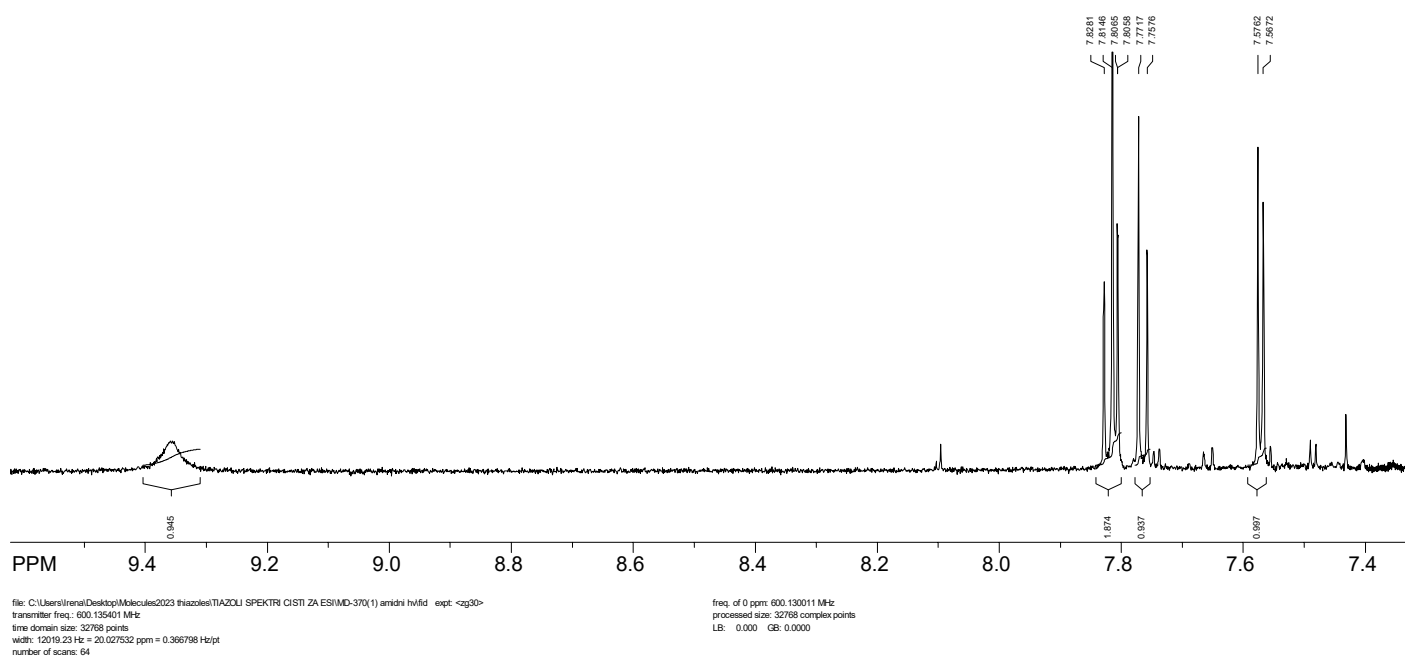

**Figure S58.** Aromatic part of the  $^1\text{H}$  NMR spectrum ( $\text{CDCl}_3$ ) of **5**.

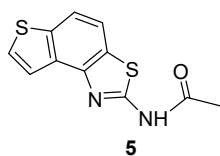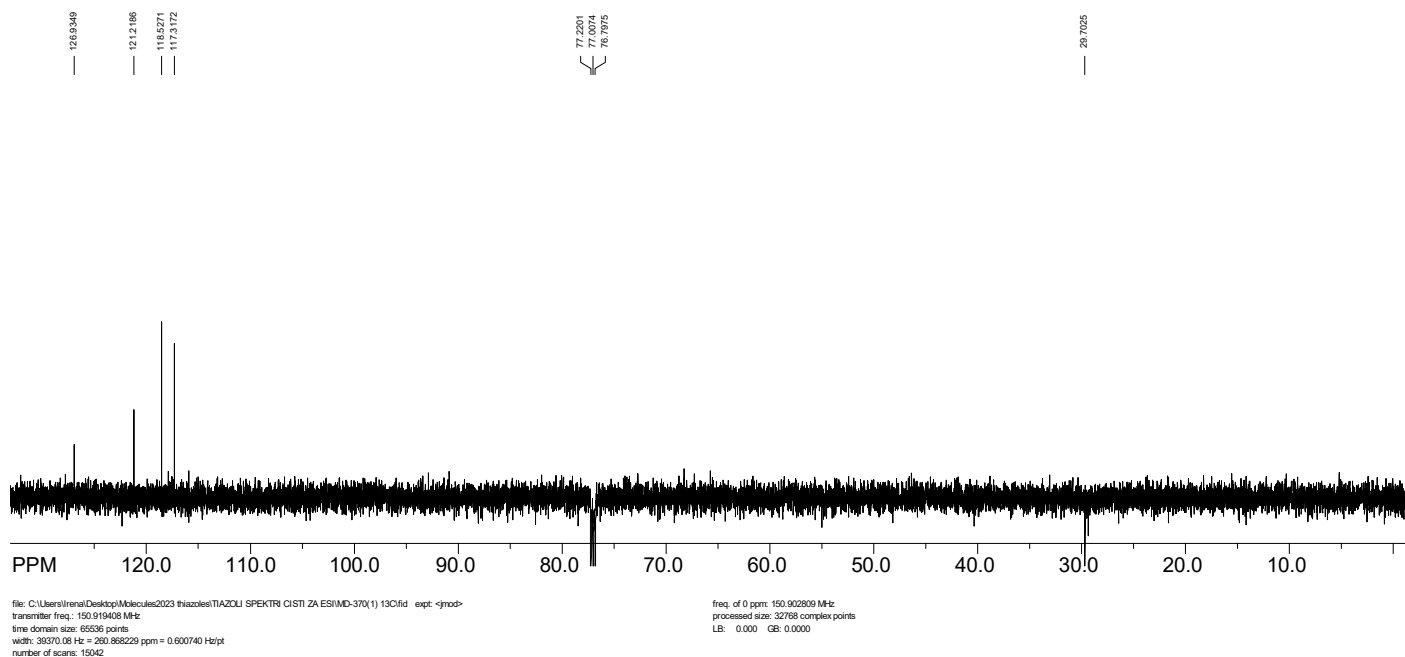

**Figure S59.**  $^{13}\text{C}$  NMR spectrum ( $\text{CDCl}_3$ ) of **5**.

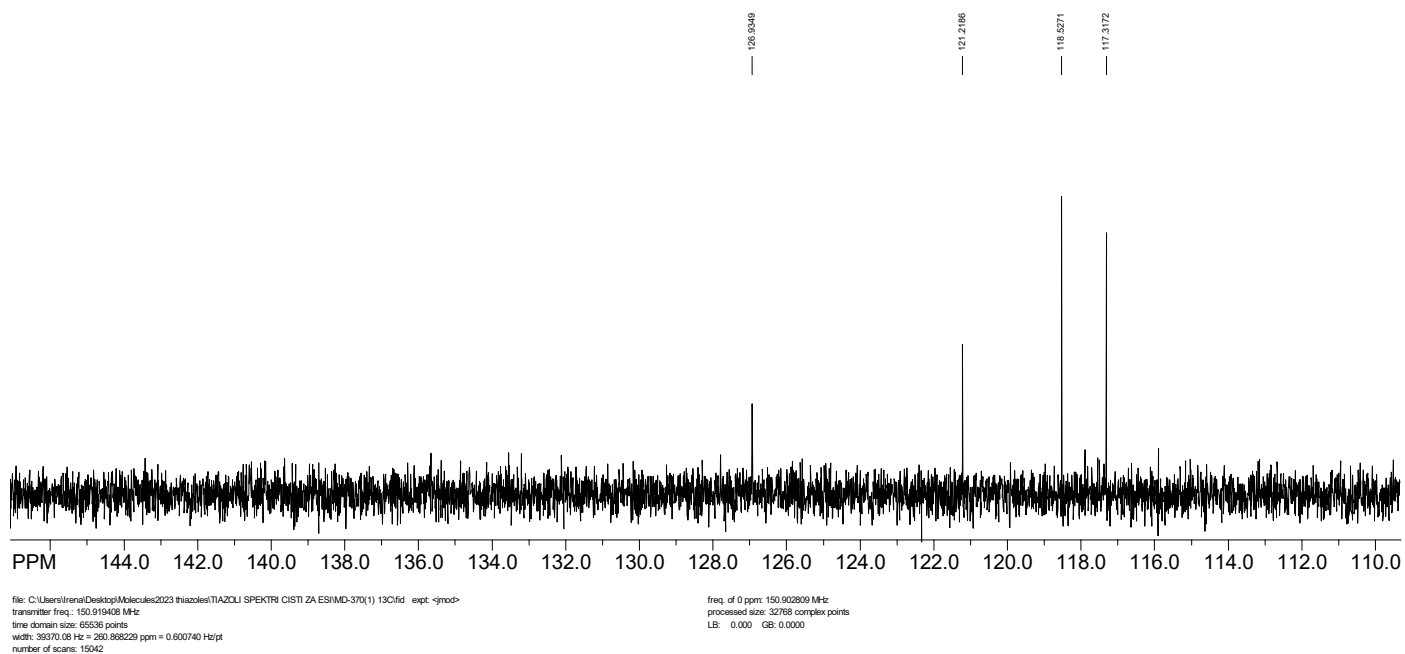

**Figure S60.** Aromatic part of the  $^{13}\text{C}$  NMR spectrum ( $\text{CDCl}_3$ ) of **5**.

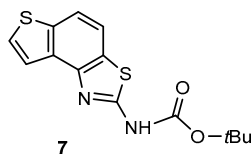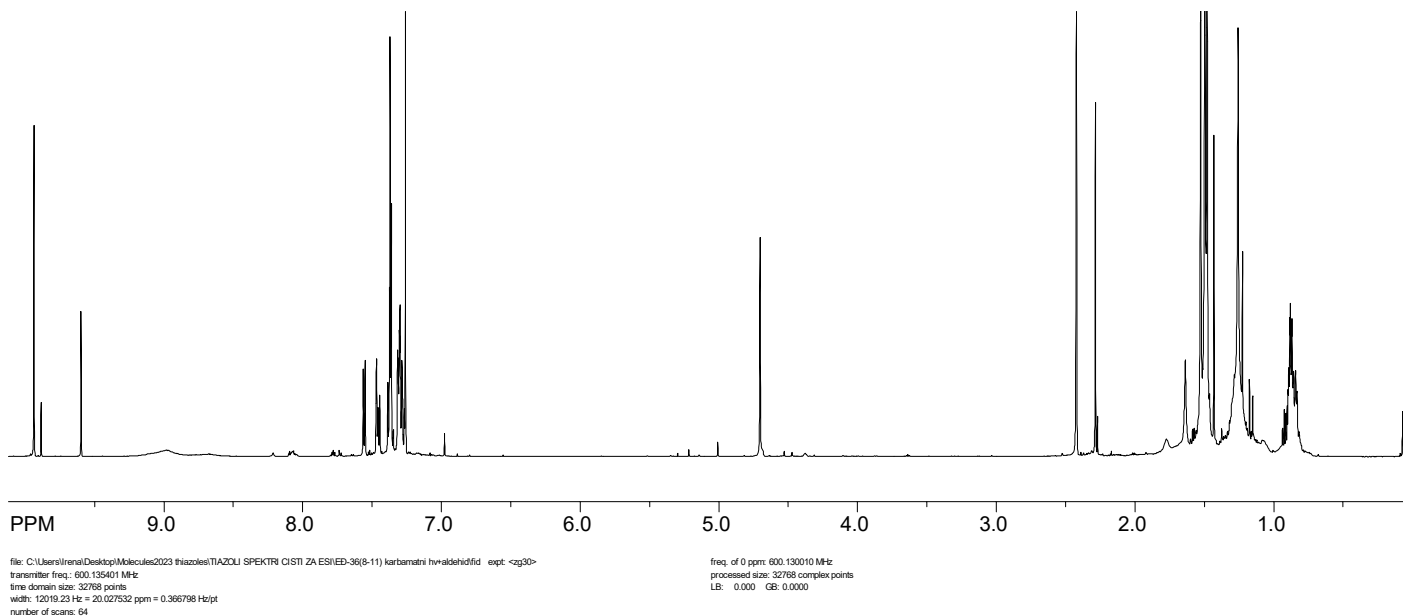

**Figure S61.**  $^1\text{H}$  NMR spectrum ( $\text{CDCl}_3$ ) of **7** and starting aldehyde from the Wittig reaction.

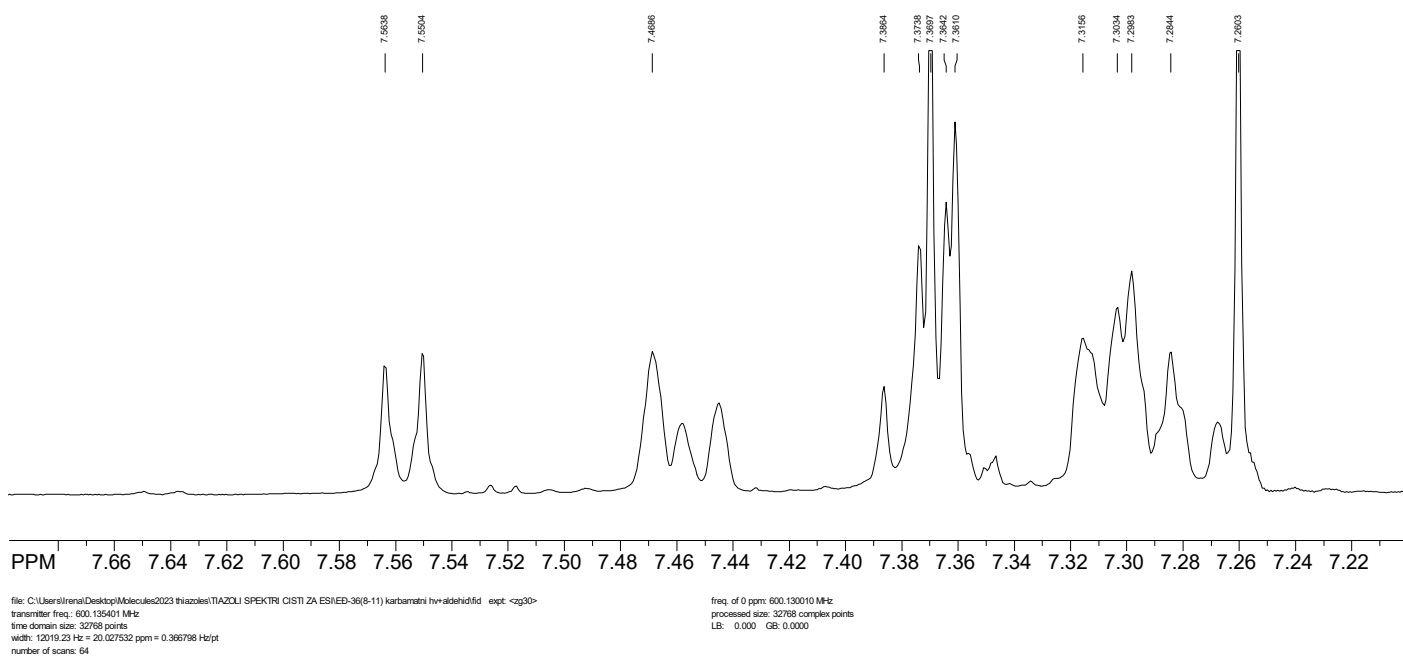

**Figure S62.** Aromatic part of the  $^1\text{H}$  NMR spectrum ( $\text{CDCl}_3$ ) of **7** and starting aldehyde from the Wittig reaction.



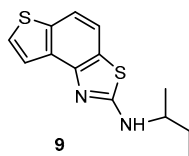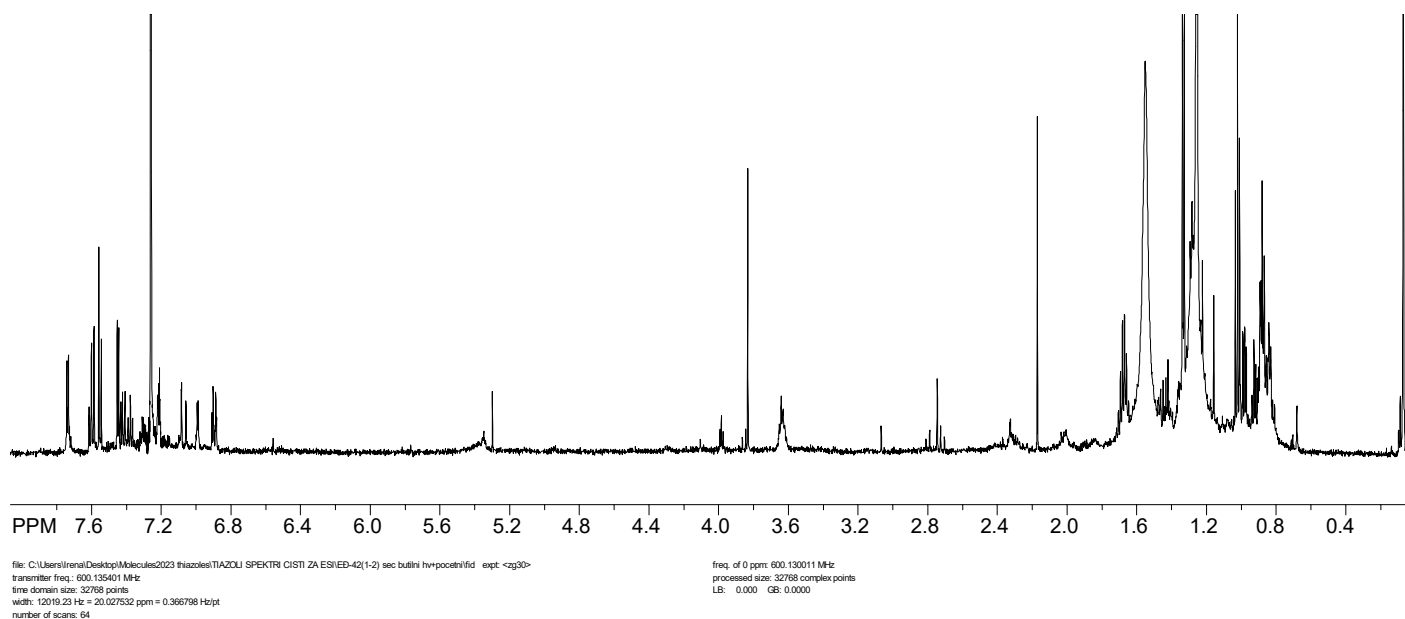

**Figure S63.**  $^1\text{H}$  NMR spectrum ( $\text{CDCl}_3$ ) of **9** and the starting **9a**.

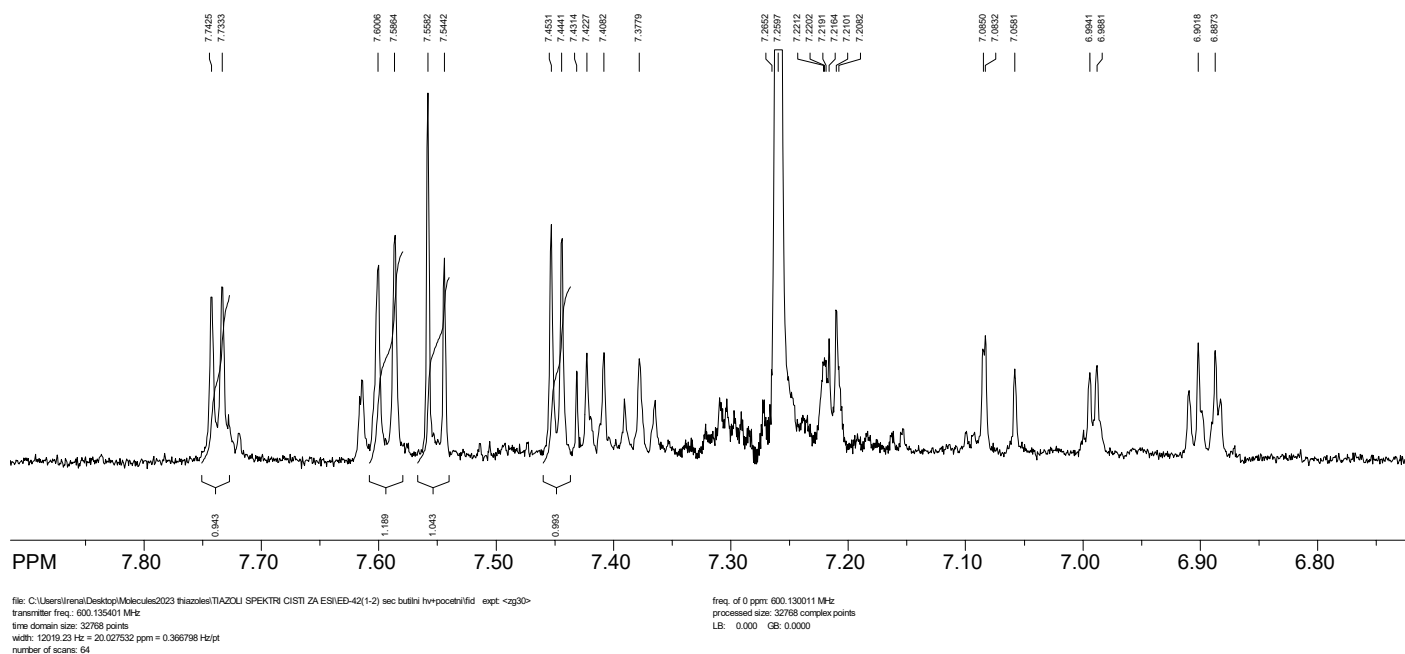

**Figure S64.** Aromatic part of the  $^1\text{H}$  NMR spectrum ( $\text{CDCl}_3$ ) of **9** as the major compound in the mixture (integrated) and the starting **9a**.

## 2. MS and HRMS analyses of compounds 1a–10a and 1–5, 7 and 9

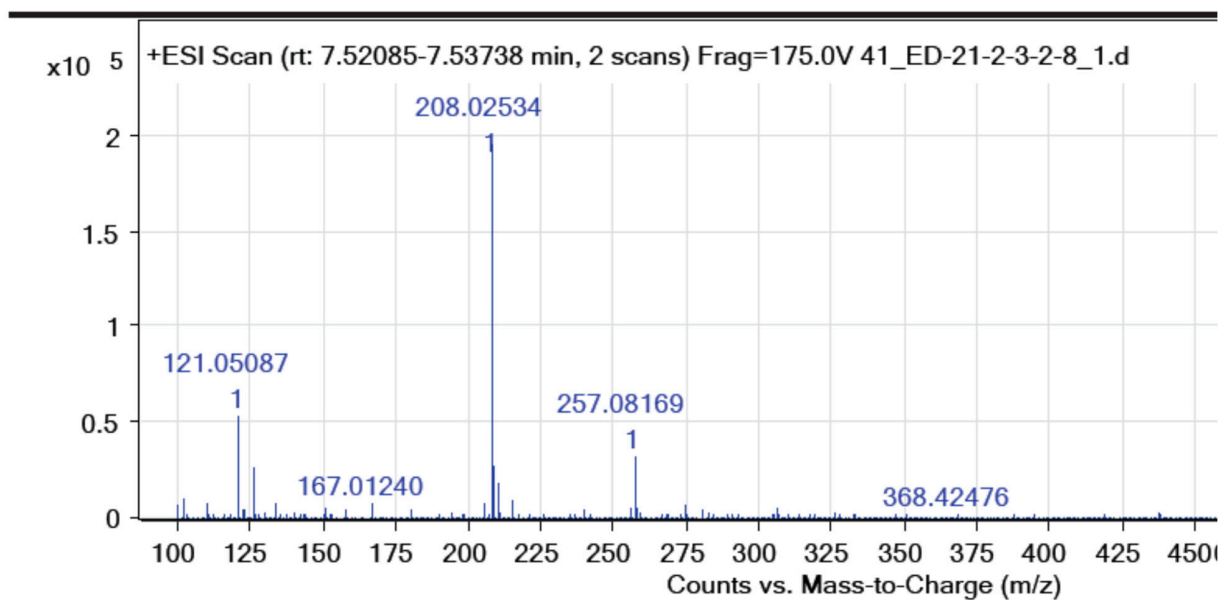

### Formula Calculator Results

| Formula     | Best | Mass      | Tgt Mass  | Diff (ppm) | Ion Species  | Score |
|-------------|------|-----------|-----------|------------|--------------|-------|
| C10 H9 N S2 | True | 207.01803 | 207.01764 | -1.88      | C10 H10 N S2 | 98.07 |

Figure S65. MS spectrum and HRMS analysis of **1a** as mixture of isomers.

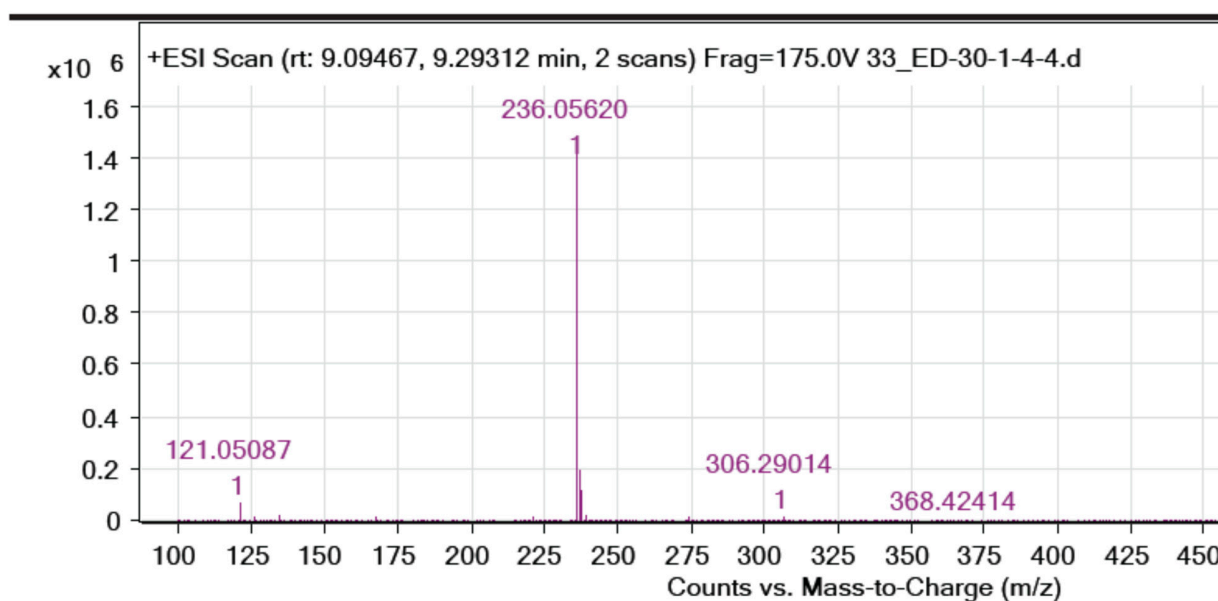

#### Formula Calculator Results

| Formula      | Best | Mass      | Tgt Mass  | Diff (ppm) | Ion Species  | Score |
|--------------|------|-----------|-----------|------------|--------------|-------|
| C12 H13 N S2 | True | 235.04893 | 235.04894 | 0.04       | C12 H14 N S2 | 98.01 |

Figure S66. MS spectrum and HRMS analysis of **2a** as mixture of isomers.

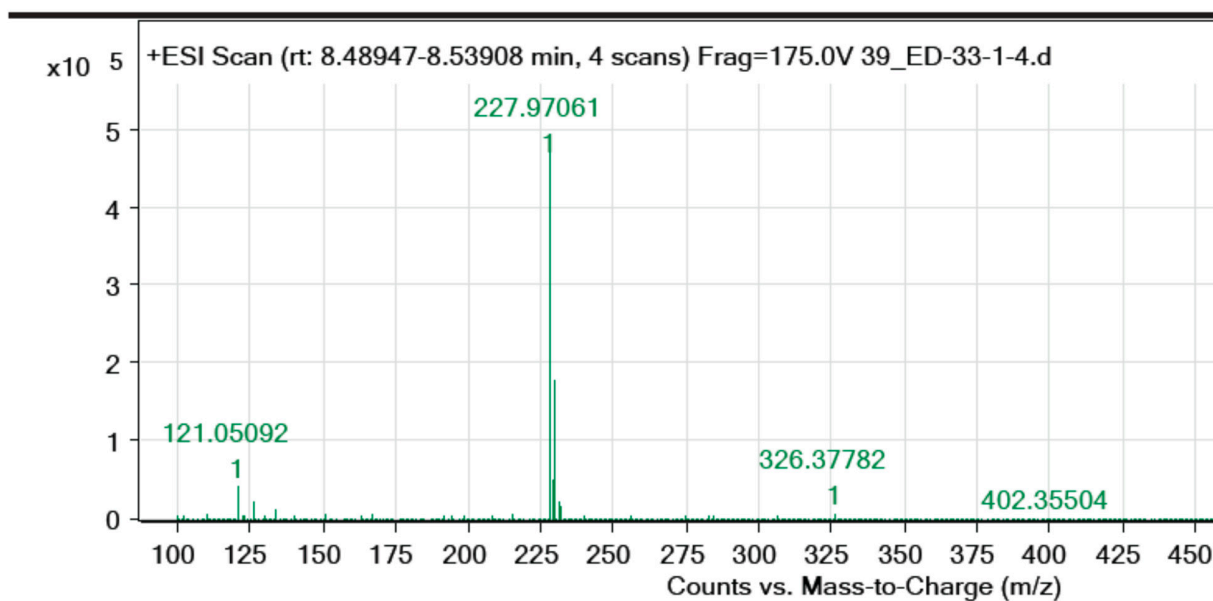

#### Formula Calculator Results

| Formula       | Best | Mass      | Tgt Mass  | Diff (ppm) | Ion Species   | Score |
|---------------|------|-----------|-----------|------------|---------------|-------|
| C9 H6 Cl N S2 | True | 226.96332 | 226.96302 | -1.31      | C9 H7 Cl N S2 | 98.1  |

Figure S67. MS spectrum and HRMS analysis of *trans*-3a as mixture of isomers.

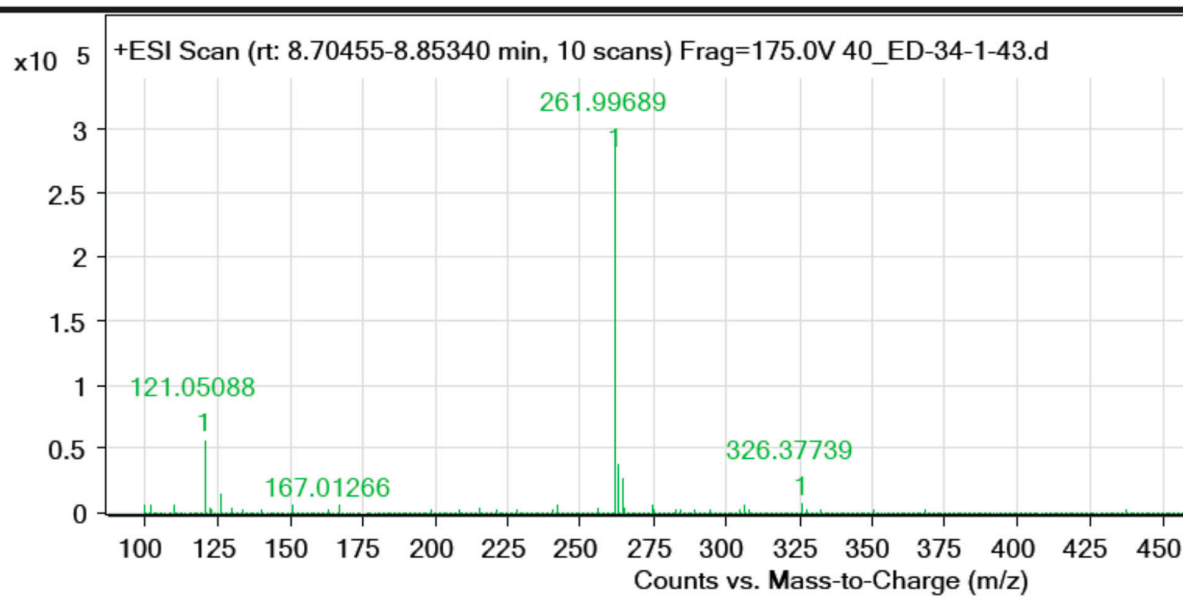

#### Formula Calculator Results

| Formula        | Best | Mass      | Tgt Mass  | Diff (ppm) | Ion Species    | Score |
|----------------|------|-----------|-----------|------------|----------------|-------|
| C10 H6 F3 N S2 | True | 260.98957 | 260.98938 | -0.75      | C10 H7 F3 N S2 | 99.19 |

Figure S68. MS spectrum and HRMS analysis of **4a** as mixture of isomers.

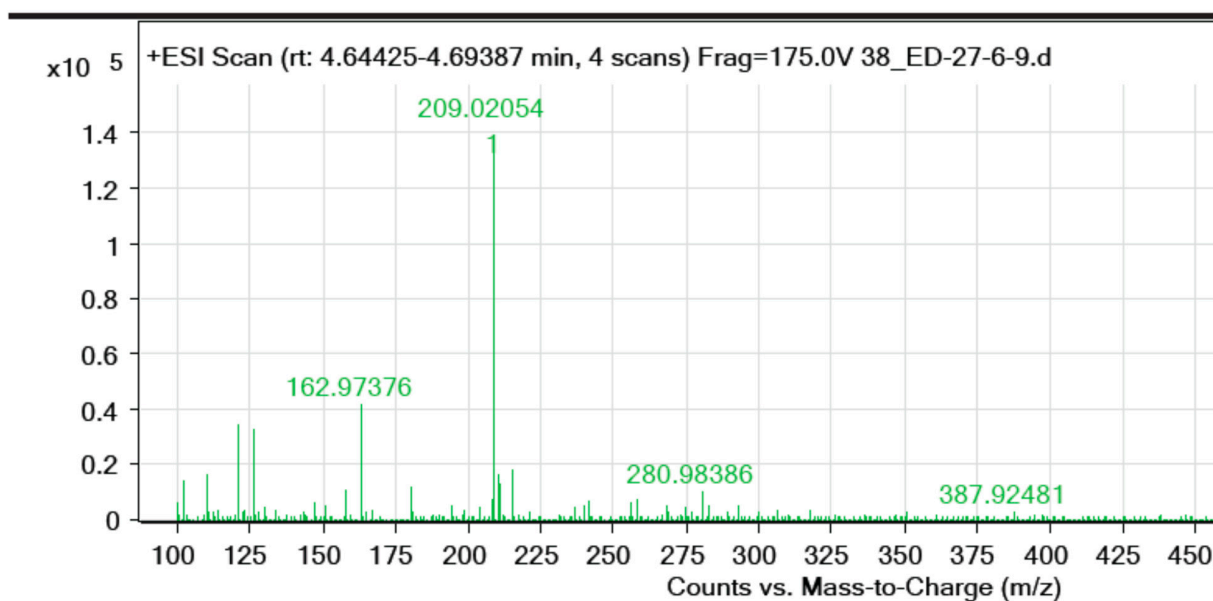

#### Formula Calculator Results

| Formula     | Best | Mass      | Tgt Mass  | Diff (ppm) | Ion Species | Score |
|-------------|------|-----------|-----------|------------|-------------|-------|
| C9 H8 N2 S2 | True | 208.01326 | 208.01289 | -1.79      | C9 H9 N2 S2 | 98.88 |

Figure S69. MS spectrum and HRMS analysis of **5a'** as mixture of isomers.

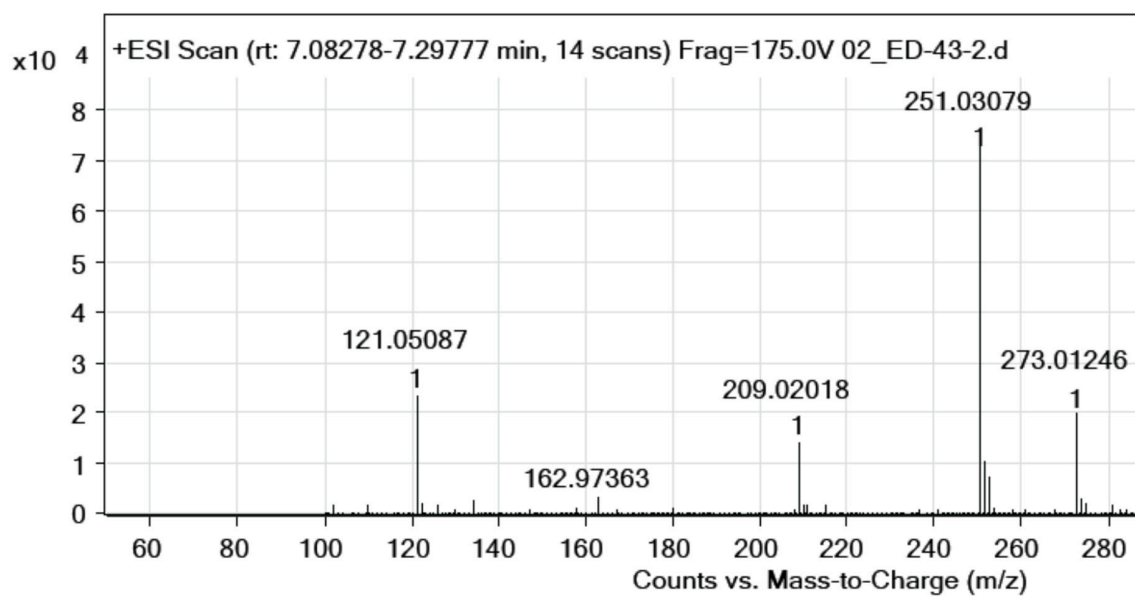

#### Formula Calculator Results

| Formula         | Best | Mass      | Tgt Mass  | Diff (ppm) | Ion Species     | Score |
|-----------------|------|-----------|-----------|------------|-----------------|-------|
| C11 H10 N2 O S2 | True | 250.02351 | 250.02345 | -0.2       | C11 H11 N2 O S2 | 99.24 |

Figure S70. MS spectrum and HRMS analysis of **5a** as mixture of isomers.

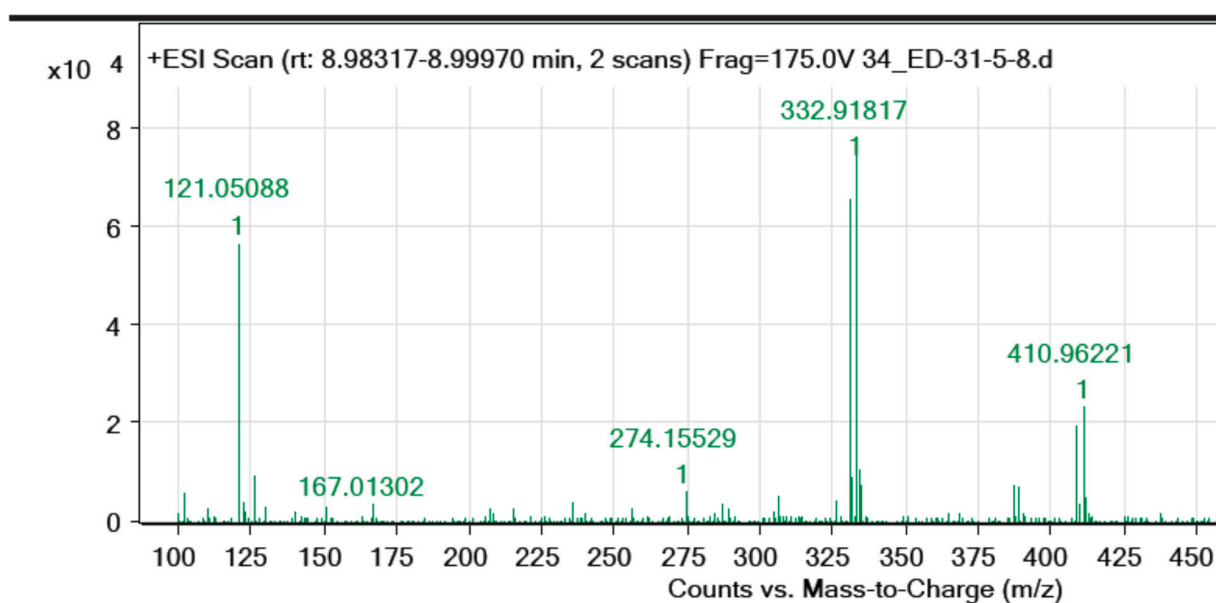

#### Formula Calculator Results

| Formula             | Best | Mass     | Tgt Mass  | Diff (ppm) | Ion Species         | Score |
|---------------------|------|----------|-----------|------------|---------------------|-------|
| C14 H15 Br N2 O2 S2 | True | 385.9751 | 385.97583 | 1.89       | C14 H16 Br N2 O2 S2 | 92.91 |

**Figure S71.** MS spectrum and HRMS analysis of **7a** as mixture of isomers.



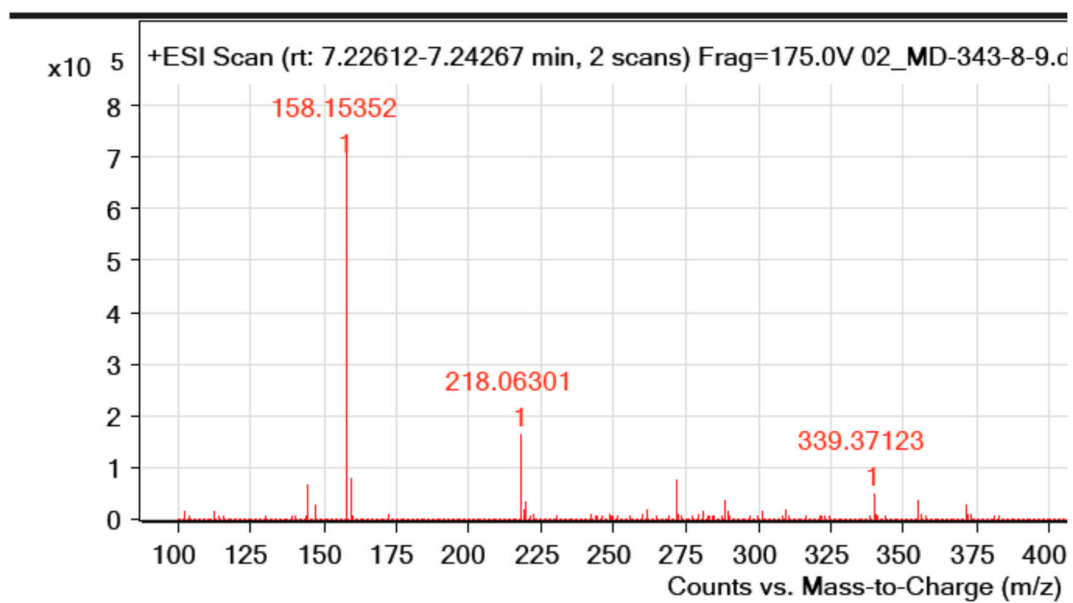

#### Formula Calculator Results

| Formula       | Best | Mass      | Tgt Mass  | Diff (ppm) | Ion Species   | Score |
|---------------|------|-----------|-----------|------------|---------------|-------|
| C12 H11 N O S | True | 217.05574 | 217.05613 | 1.8        | C12 H12 N O S | 63.05 |

Figure S72. MS spectrum and HRMS analysis of *trans*-8a.

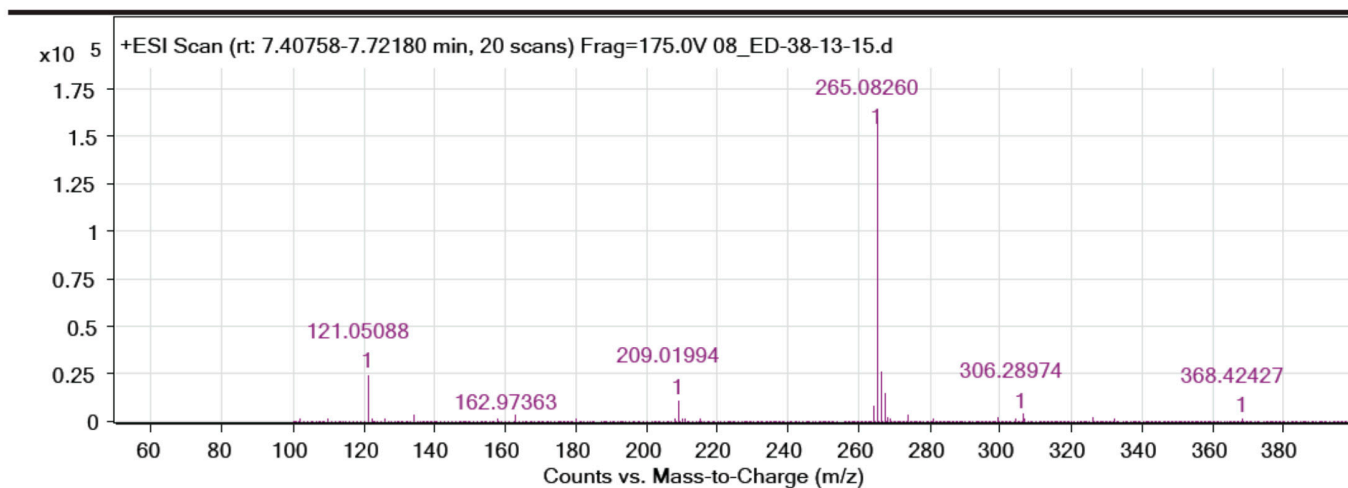

#### Formula Calculator Results

| Formula       | Best | Mass     | Tgt Mass  | Diff (ppm) | Ion Species   | Score |
|---------------|------|----------|-----------|------------|---------------|-------|
| C13 H16 N2 S2 | True | 264.0753 | 264.07549 | 0.72       | C13 H17 N2 S2 | 98.71 |

**Figure S73.** MS spectrum and HRMS analysis of **9a** as mixture of isomers.

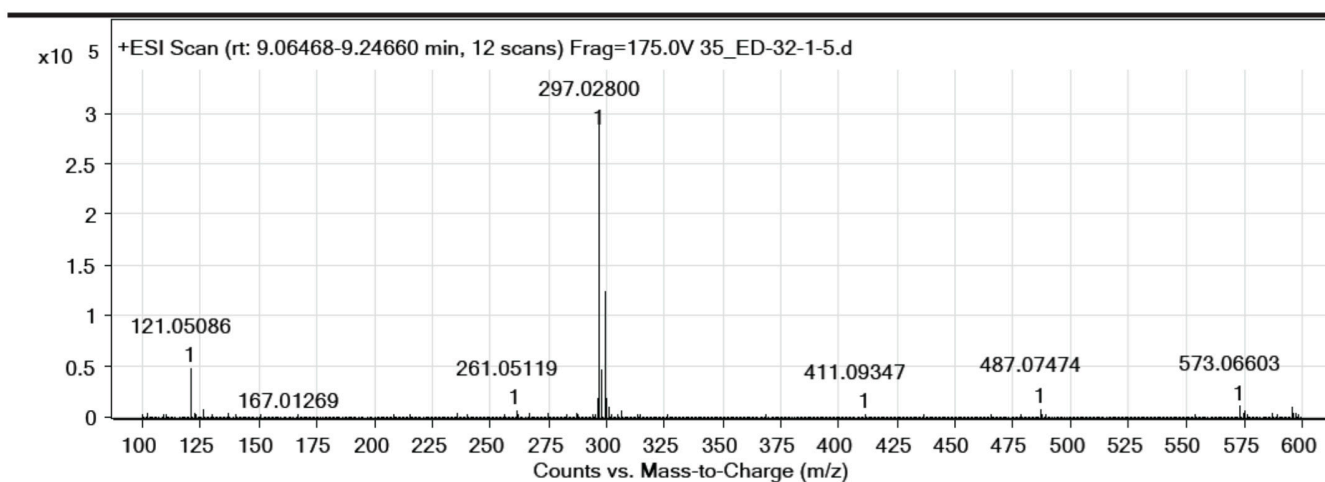

#### Formula Calculator Results

| Formula          | Best | Mass      | Tgt Mass  | Diff (ppm) | Ion Species      | Score |
|------------------|------|-----------|-----------|------------|------------------|-------|
| C13 H13 Cl N2 S2 | True | 296.02065 | 296.02087 | 0.72       | C13 H14 Cl N2 S2 | 99.56 |

Figure S74. MS spectrum and HRMS analysis of **10a** as mixture of isomers.

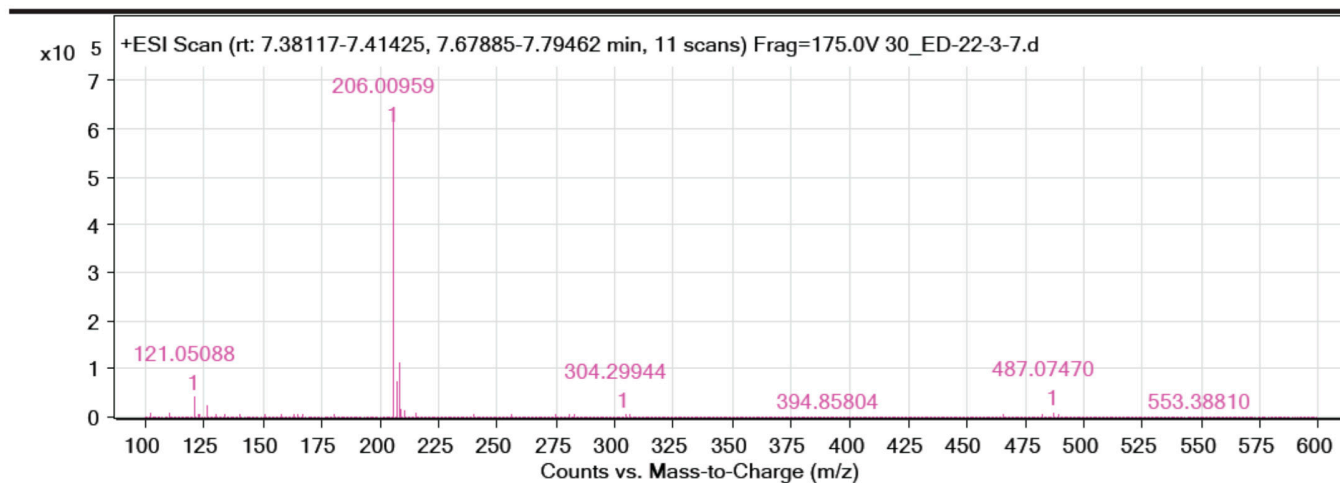

**Formula Calculator Results**

| Formula     | Best | Mass      | Tgt Mass  | Diff (ppm) | Ion Species | Score |
|-------------|------|-----------|-----------|------------|-------------|-------|
| C10 H7 N S2 | True | 205.00229 | 205.00199 | -1.44      | C10 H8 N S2 | 98.11 |

Figure S75. MS spectrum and HRMS analysis of **1**.

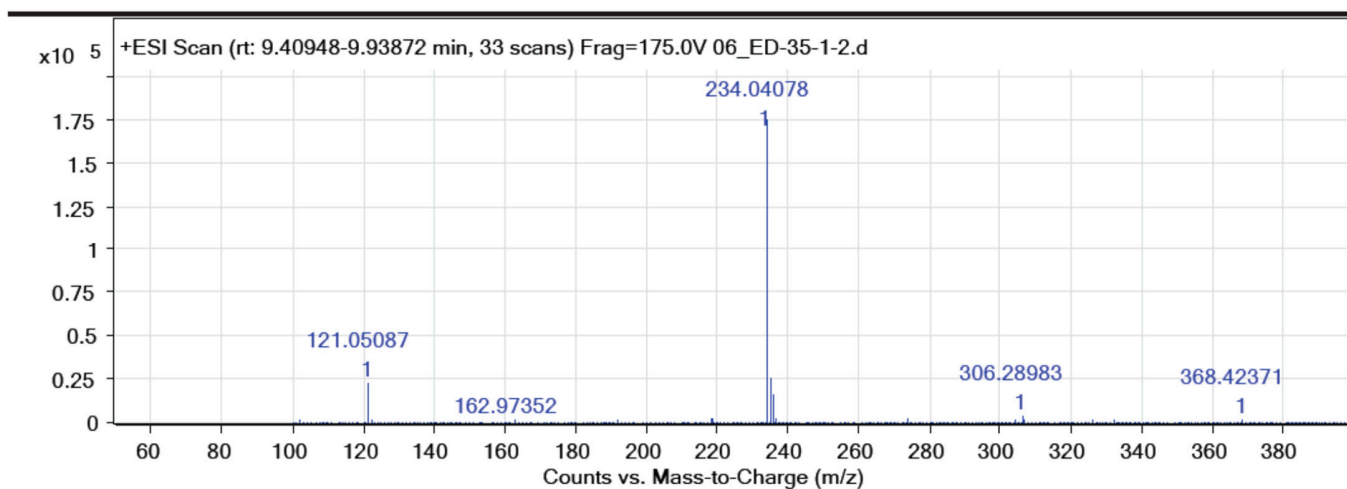

#### Formula Calculator Results

| Formula      | Best | Mass      | Tgt Mass  | Diff (ppm) | Ion Species  | Score |
|--------------|------|-----------|-----------|------------|--------------|-------|
| C12 H11 N S2 | True | 233.03349 | 233.03329 | -0.86      | C12 H12 N S2 | 98.96 |

Figure S76. MS spectrum and HRMS analysis of 2.

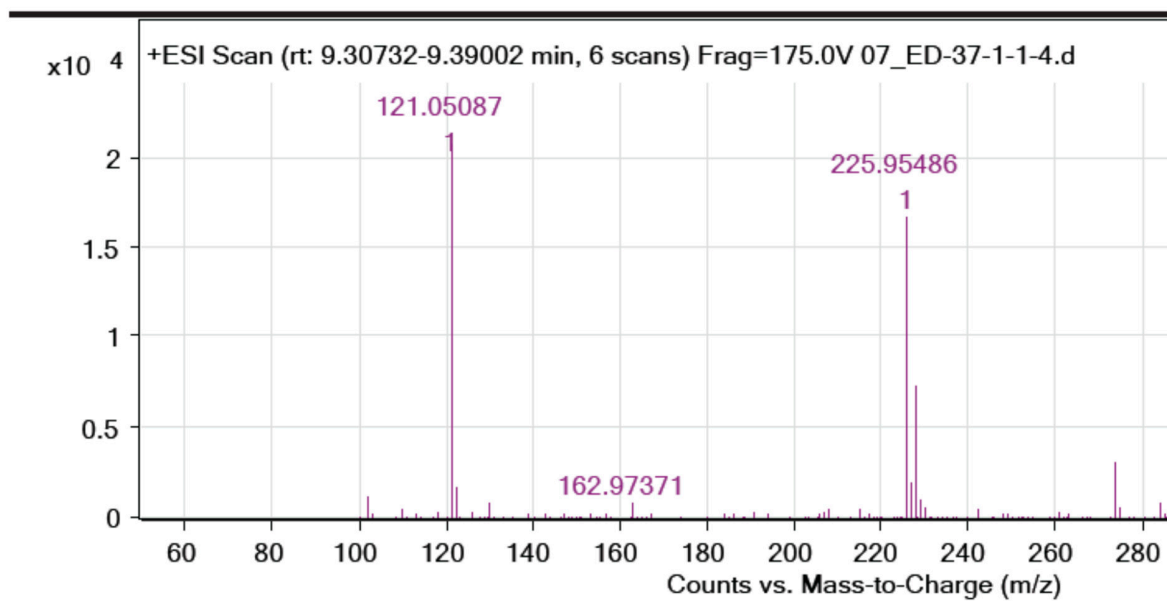

#### Formula Calculator Results

| Formula       | Best | Mass      | Tgt Mass  | Diff (ppm) | Ion Species   | Score |
|---------------|------|-----------|-----------|------------|---------------|-------|
| C9 H4 Cl N S2 | True | 224.94752 | 224.94737 | -0.69      | C9 H5 Cl N S2 | 99.32 |

Figure S77. MS spectrum and HRMS analysis of 3.

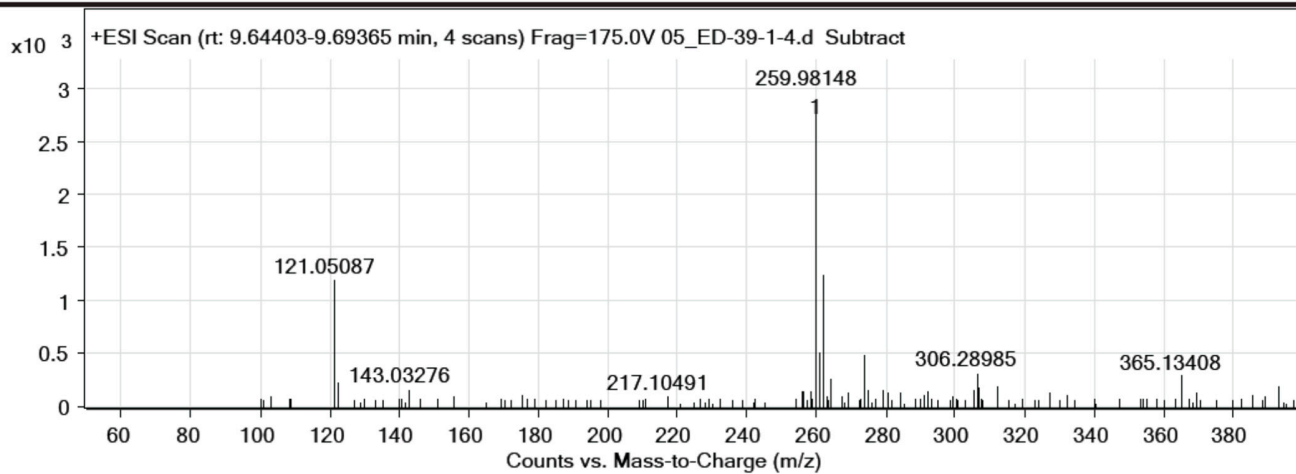

**Formula Calculator Results**

| Formula        | Best | Mass      | Tgt Mass  | Diff (ppm) | Ion Species    | Score |
|----------------|------|-----------|-----------|------------|----------------|-------|
| C10 H4 F3 N S2 | True | 258.97404 | 258.97373 | -1.21      | C10 H5 F3 N S2 | 92.02 |

Figure S78. MS spectrum and HRMS analysis of **4**.

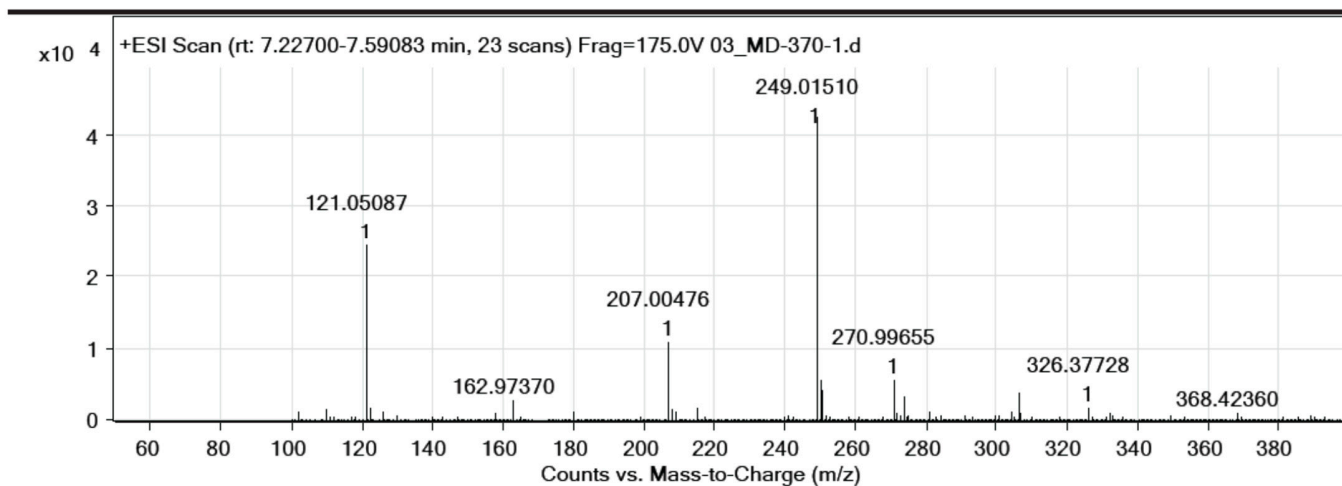

#### Formula Calculator Results

| Formula        | Best | Mass      | Tgt Mass | Diff (ppm) | Ion Species    | Score |
|----------------|------|-----------|----------|------------|----------------|-------|
| C11 H8 N2 O S2 | True | 248.00789 | 248.0078 | -0.34      | C11 H9 N2 O S2 | 98.58 |

Figure S79. MS spectrum and HRMS analysis of 5.



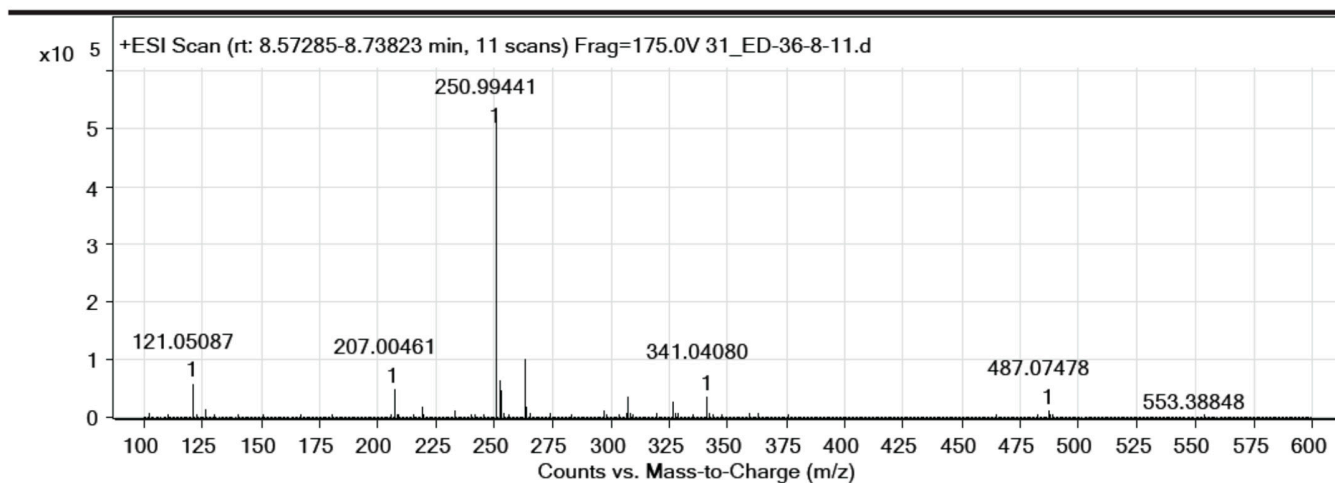

#### Formula Calculator Results

| Formula          | Best | Mass      | Tgt Mass  | Diff (ppm) | Ion Species      | Score |
|------------------|------|-----------|-----------|------------|------------------|-------|
| C14 H14 N2 O2 S2 | True | 306.04924 | 306.04967 | 1.39       | C14 H15 N2 O2 S2 | 98.08 |

Figure S80. MS spectrum and HRMS analysis of 7 with starting compound.

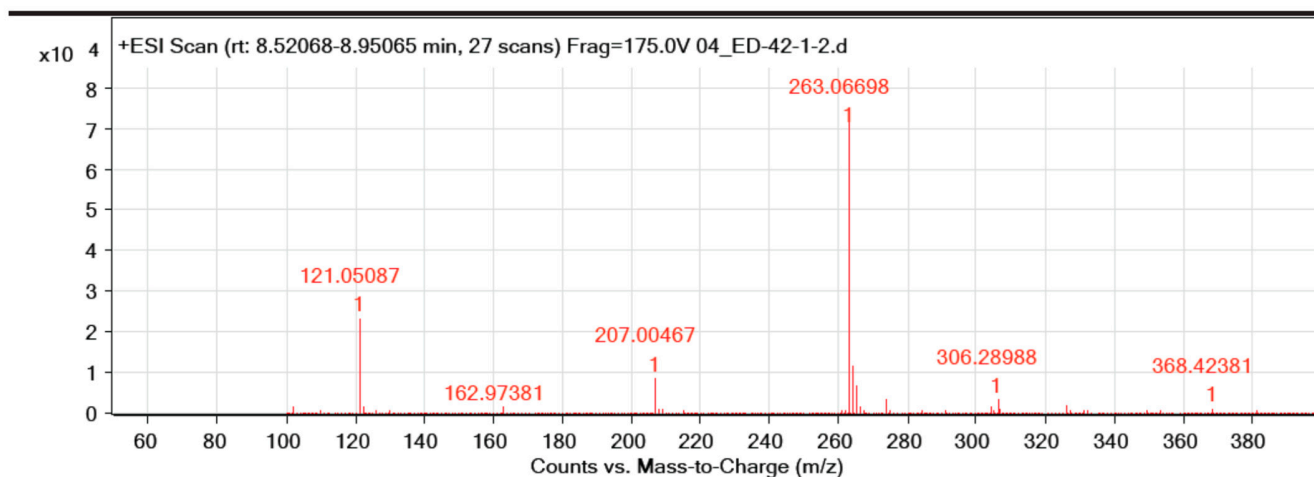

#### Formula Calculator Results

| Formula       | Best | Mass      | Tgt Mass  | Diff (ppm) | Ion Species   | Score |
|---------------|------|-----------|-----------|------------|---------------|-------|
| C13 H14 N2 S2 | True | 262.05969 | 262.05984 | 0.57       | C13 H15 N2 S2 | 98.99 |

Figure S81. MS spectrum and HRMS analysis of **9** with starting compound.

#### Geometries of studied thieno-thiazolostilbenes and thienobenzo-thiazoles

##### Thieno-thiazolostilbenes

##### cis-1a

|   |           |           |           |
|---|-----------|-----------|-----------|
| S | 1.222767  | -1.817924 | 1.245989  |
| C | 0.182542  | -0.489927 | 1.663143  |
| C | 0.516490  | 0.627016  | 0.944932  |
| C | 1.601604  | 0.413968  | 0.044966  |
| C | 2.083072  | -0.859962 | 0.102003  |
| C | -0.849641 | -0.632564 | 2.695699  |
| C | -2.160421 | -0.385739 | 2.543176  |
| C | -2.923889 | -0.055930 | 1.350441  |
| S | -2.362161 | -0.010020 | -0.296650 |
| C | -3.994505 | 0.313928  | -0.822689 |
| N | -4.870604 | 0.390487  | 0.133954  |
| C | -4.273940 | 0.178126  | 1.347321  |
| C | -4.323189 | 0.494688  | -2.271290 |
| H | 2.893687  | -1.293792 | -0.466762 |
| H | 2.006842  | 1.177864  | -0.607531 |
| H | -4.881389 | 0.194830  | 2.245907  |
| H | -3.768375 | 1.332876  | -2.703127 |
| H | -4.081137 | -0.402645 | -2.848311 |
| H | -5.392299 | 0.694378  | -2.355909 |
| H | -0.512018 | -0.955595 | 3.678103  |

|   |           |           |          |
|---|-----------|-----------|----------|
| H | -2.788052 | -0.480328 | 3.427824 |
| H | 0.001222  | 1.572543  | 1.071645 |

**cis-2a**

|   |           |           |           |
|---|-----------|-----------|-----------|
| C | -0.125403 | 0.415262  | -0.381751 |
| C | -0.041833 | 0.475372  | 0.982057  |
| N | 1.238180  | 0.300104  | 1.484069  |
| C | 2.107068  | 0.100650  | 0.547147  |
| S | 1.423985  | 0.129879  | -1.066198 |
| C | -1.090761 | 0.782624  | 1.960482  |
| C | -2.427535 | 0.771589  | 1.839708  |
| C | -3.231854 | 0.310416  | 0.705278  |
| S | -4.679052 | 1.168241  | 0.266552  |
| C | -5.049646 | 0.035365  | -0.974988 |
| C | -4.116333 | -0.956827 | -1.045485 |
| C | -3.079856 | -0.802663 | -0.080206 |
| H | -4.167584 | -1.775583 | -1.753202 |
| H | -5.932185 | 0.167445  | -1.585019 |
| H | -2.996928 | 1.126392  | 2.696486  |
| H | -0.680305 | 1.085101  | 2.920362  |
| H | -0.999905 | 0.541399  | -1.002866 |
| C | 3.573925  | -0.167657 | 0.780203  |
| C | 4.450631  | 0.537815  | -0.258771 |
| C | 3.963971  | 0.231371  | 2.202935  |
| H | 3.722674  | -1.251323 | 0.670318  |
| H | 5.505471  | 0.319373  | -0.069233 |
| H | 4.221571  | 0.213075  | -1.278960 |
| H | 4.309303  | 1.622255  | -0.206414 |
| H | 5.014517  | -0.014776 | 2.383132  |
| H | 3.828461  | 1.307950  | 2.345393  |
| H | 3.344248  | -0.282404 | 2.939627  |
| H | -2.253966 | -1.493492 | 0.046636  |

**trans-1a**

|   |           |           |           |
|---|-----------|-----------|-----------|
| S | -0.052475 | -0.094820 | 0.001294  |
| C | -0.026031 | 0.021018  | 1.736939  |
| C | 1.278148  | 0.100527  | 2.144580  |
| N | 2.236364  | 0.074296  | 1.164450  |
| C | 1.695972  | -0.025333 | -0.010439 |
| C | -1.203418 | 0.029428  | 2.579580  |
| C | -2.475181 | -0.050182 | 2.152979  |
| C | -3.658687 | -0.042380 | 2.990968  |
| C | -4.960144 | -0.122603 | 2.562579  |
| C | -5.907514 | -0.090567 | 3.624868  |
| C | -5.313384 | 0.013574  | 4.847100  |
| S | -3.594387 | 0.074219  | 4.725119  |
| C | 2.467639  | -0.079553 | -1.290551 |
| H | -2.679379 | -0.129193 | 1.085356  |
| H | -0.994400 | 0.108599  | 3.646253  |
| H | -5.785177 | 0.058711  | 5.818631  |

|   |           |           |           |
|---|-----------|-----------|-----------|
| H | -6.980307 | -0.142632 | 3.484575  |
| H | 1.582659  | 0.181513  | 3.182033  |
| H | 2.201972  | 0.751434  | -1.950592 |
| H | 3.529643  | -0.016751 | -1.049303 |
| H | 2.278932  | -1.012874 | -1.829192 |
| H | -5.222373 | -0.202055 | 1.513416  |

#### **trans-2a**

|   |           |           |           |
|---|-----------|-----------|-----------|
| C | -0.482783 | 0.503264  | 0.664125  |
| C | -0.370404 | 0.045169  | 1.952767  |
| S | 1.269040  | -0.432081 | 2.286831  |
| C | 1.775594  | -0.010975 | 0.692846  |
| C | 0.744686  | 0.471147  | -0.057094 |
| C | -1.434309 | -0.041694 | 2.935652  |
| C | -1.308413 | -0.493509 | 4.192918  |
| C | -2.414792 | -0.551893 | 5.139001  |
| C | -2.321668 | -1.001103 | 6.426083  |
| S | -3.851972 | -0.912044 | 7.207032  |
| C | -4.533103 | -0.257006 | 5.726893  |
| N | -3.680281 | -0.133962 | 4.763771  |
| H | -0.345094 | -0.841693 | 4.562617  |
| H | -2.413459 | 0.296633  | 2.602488  |
| H | 0.853436  | 0.792546  | -1.086038 |
| H | 2.808108  | -0.146461 | 0.402306  |
| H | -1.423292 | 0.853712  | 0.253654  |
| C | -5.989231 | 0.128304  | 5.644080  |
| H | -1.445223 | -1.376410 | 6.935063  |
| C | -6.343187 | 0.566776  | 4.224524  |
| C | -6.893494 | -1.017041 | 6.115044  |
| H | -6.137638 | 0.980296  | 6.322051  |
| H | -7.389423 | 0.883769  | 4.184923  |
| H | -5.708631 | 1.391692  | 3.894837  |
| H | -6.201860 | -0.262196 | 3.524724  |
| H | -7.943011 | -0.714307 | 6.055169  |
| H | -6.752114 | -1.897998 | 5.480555  |
| H | -6.684969 | -1.305435 | 7.150038  |

#### **trans-3a**

|   |           |           |           |
|---|-----------|-----------|-----------|
| C | 0.186517  | -0.000080 | 0.349437  |
| C | 0.019727  | -0.000025 | 1.713469  |
| S | 1.561503  | -0.000024 | 2.512754  |
| C | 2.408222  | 0.000108  | 1.017211  |
| C | 1.551512  | 0.000216  | -0.046103 |
| C | -1.197590 | -0.000046 | 2.507994  |
| C | -2.443708 | 0.000598  | 2.004541  |
| C | -3.666208 | 0.000500  | 2.780452  |
| S | -3.727890 | -0.000664 | 4.522035  |
| C | -5.464030 | 0.000313  | 4.408437  |
| N | -5.961790 | 0.000979  | 3.222519  |

|    |           |           |           |
|----|-----------|-----------|-----------|
| C  | -4.947612 | 0.001107  | 2.297526  |
| Cl | -6.414984 | -0.000175 | 5.839666  |
| H  | -1.064014 | -0.000636 | 3.589519  |
| H  | -2.594893 | 0.001272  | 0.926703  |
| H  | 1.882160  | 0.000351  | -1.077675 |
| H  | 3.488939  | 0.000169  | 1.004769  |
| H  | -5.198835 | 0.001757  | 1.243374  |
| H  | -0.640636 | 0.000040  | -0.351015 |

**trans-8a**

|   |           |           |           |
|---|-----------|-----------|-----------|
| C | 0.027435  | 0.007836  | -0.054621 |
| N | -0.024604 | 0.156960  | 1.311936  |
| C | 1.142496  | -0.024352 | 1.862396  |
| S | 2.418073  | -0.399510 | 0.718558  |
| C | 1.259660  | -0.293057 | -0.553120 |
| C | 1.355369  | 0.078113  | 3.300136  |
| C | 2.546402  | -0.103609 | 3.895489  |
| C | 2.898554  | -0.031557 | 5.313263  |
| C | 1.993237  | 0.258196  | 6.354080  |
| C | 2.423108  | 0.305001  | 7.678683  |
| C | 3.754323  | 0.066634  | 8.000116  |
| C | 4.669268  | -0.221761 | 6.991926  |
| C | 4.233498  | -0.266577 | 5.674653  |
| H | 4.943148  | -0.491266 | 4.882615  |
| C | -1.227512 | 0.181792  | -0.853425 |
| H | 1.701693  | 0.531178  | 8.461052  |
| H | 4.070461  | 0.107449  | 9.037536  |
| H | 5.710673  | -0.409671 | 7.229141  |
| O | 0.693389  | 0.489904  | 6.029827  |
| H | 3.399447  | -0.341644 | 3.257746  |
| H | 0.460104  | 0.316750  | 3.859149  |
| H | -1.987085 | -0.535751 | -0.529699 |
| H | -1.637741 | 1.184760  | -0.703828 |
| H | -1.039218 | 0.035687  | -1.919226 |
| H | 1.540350  | -0.454613 | -1.584110 |
| H | 0.192600  | 0.673211  | 6.837579  |

**trans-9a**

|   |           |           |          |
|---|-----------|-----------|----------|
| S | 0.095933  | 0.142108  | 0.138247 |
| C | 0.014502  | 0.101492  | 1.891967 |
| C | 1.285426  | 0.171299  | 2.382383 |
| N | 2.316049  | 0.227776  | 1.478254 |
| C | 1.848613  | 0.220170  | 0.261600 |
| C | -1.248861 | 0.010169  | 2.601082 |
| C | -1.376892 | -0.526273 | 3.827876 |
| C | -2.614693 | -0.516410 | 4.593335 |
| C | -3.726079 | 0.276636  | 4.447949 |
| C | -4.759549 | -0.030555 | 5.376716 |
| C | -4.420214 | -1.043526 | 6.225549 |

|   |           |           |           |
|---|-----------|-----------|-----------|
| S | -2.839617 | -1.641234 | 5.899150  |
| N | 2.622975  | 0.296751  | -0.854831 |
| C | 4.079911  | 0.170207  | -0.752857 |
| H | 4.302825  | -0.606579 | -0.007862 |
| C | 4.687535  | 1.488585  | -0.280635 |
| H | -2.130698 | 0.408723  | 2.102031  |
| H | -0.514171 | -1.005777 | 4.286789  |
| H | -5.006902 | -1.468705 | 7.027537  |
| H | -5.708823 | 0.489906  | 5.419869  |
| H | -3.787026 | 1.073446  | 3.715579  |
| H | 1.516102  | 0.211603  | 3.441214  |
| H | 2.198058  | 0.009964  | -1.725638 |
| C | 4.608629  | -0.275736 | -2.116550 |
| H | 5.756650  | 1.374097  | -0.080146 |
| H | 4.551523  | 2.262505  | -1.043866 |
| H | 4.200366  | 1.809296  | 0.642281  |
| C | 6.121590  | -0.473897 | -2.142496 |
| H | 4.113312  | -1.215691 | -2.392449 |
| H | 4.319113  | 0.473263  | -2.866672 |
| H | 6.439502  | -0.899631 | -3.097710 |
| H | 6.652379  | 0.472130  | -2.006967 |
| H | 6.439428  | -1.156599 | -1.347421 |

#### **trans-10a**

|    |           |           |           |
|----|-----------|-----------|-----------|
| C  | 0.131685  | -0.020841 | 0.372963  |
| C  | -0.011760 | 0.005931  | 1.737963  |
| S  | 1.546105  | 0.043523  | 2.511519  |
| C  | 2.363096  | 0.022763  | 0.992486  |
| C  | 1.490305  | -0.011165 | -0.053551 |
| C  | -1.260796 | 0.004183  | 2.474104  |
| C  | -1.387794 | 0.030493  | 3.813626  |
| C  | -2.633581 | 0.028521  | 4.537076  |
| C  | -2.845167 | 0.051822  | 5.888286  |
| N  | -4.118947 | 0.038679  | 6.364270  |
| C  | -4.952182 | 0.004758  | 5.354737  |
| S  | -4.209334 | -0.010243 | 3.759252  |
| N  | -6.288096 | -0.011742 | 5.491075  |
| C  | -6.926859 | 0.066741  | 6.804444  |
| C  | -8.379868 | 0.390257  | 6.446060  |
| C  | -8.569508 | -0.292540 | 5.085427  |
| C  | -7.230644 | -0.046957 | 4.381432  |
| Cl | -1.553991 | 0.094433  | 7.040348  |
| H  | -0.500124 | 0.056078  | 4.444134  |
| H  | -2.151569 | -0.021507 | 1.846467  |
| H  | 1.801304  | -0.028671 | -1.091094 |
| H  | 3.443549  | 0.036972  | 0.962982  |
| H  | -7.224102 | 0.908315  | 3.836650  |
| H  | -6.970242 | -0.843709 | 3.674381  |
| H  | -8.719035 | -1.368170 | 5.223518  |
| H  | -9.414767 | 0.100538  | 4.517242  |
| H  | -9.083802 | 0.038852  | 7.203070  |

|   |           |           |           |
|---|-----------|-----------|-----------|
| H | -8.502661 | 1.473207  | 6.341040  |
| H | -6.830771 | -0.892292 | 7.328760  |
| H | -6.438779 | 0.832217  | 7.412990  |
| H | -0.718361 | -0.046662 | -0.299841 |

# Thienobenzo-thiazoles

## 1

|   |           |           |           |           |
|---|-----------|-----------|-----------|-----------|
| C | -0.921114 | -0.523620 | 0.000060  | -0.336276 |
| C | 0.468697  | -0.280019 | 0.000039  | -0.369874 |
| C | 0.928175  | 1.042913  | 0.000032  | 1.426548  |
| C | 0.052474  | 2.143012  | 0.000022  | -0.513438 |
| C | -1.308507 | 1.910764  | 0.000022  | 0.231021  |
| C | -1.781710 | 0.585696  | 0.000037  | -0.972895 |
| S | 2.669611  | 1.030483  | -0.000024 | 0.096595  |
| C | 2.623486  | -0.733374 | -0.000039 | 0.339665  |
| N | 1.445425  | -1.258957 | -0.000032 | -0.146248 |
| H | -2.005103 | 2.742700  | -0.000013 | 0.246323  |
| H | 0.437256  | 3.157035  | 0.000003  | 0.249316  |
| C | -1.627619 | -1.773490 | 0.000059  | -0.642906 |
| C | -2.970625 | -1.598065 | 0.000035  | -0.198123 |
| S | -3.448791 | 0.073802  | -0.000056 | -0.107136 |
| C | 3.894639  | -1.521068 | 0.000005  | -0.618932 |
| H | 3.642535  | -2.582212 | -0.000520 | 0.261102  |
| H | 4.497110  | -1.294649 | -0.884542 | 0.264163  |
| H | 4.496541  | -1.295417 | 0.885142  | 0.264191  |
| H | -1.132239 | -2.736139 | -0.000191 | 0.253347  |
| H | -3.734580 | -2.363672 | -0.000013 | 0.273469  |

## 2

|   |           |           |           |           |
|---|-----------|-----------|-----------|-----------|
| S | -4.093695 | 0.189810  | 0.107581  | -0.131384 |
| C | -2.416407 | 0.663723  | 0.068854  | -1.141945 |
| C | -1.582136 | -0.462584 | -0.049456 | 0.974046  |
| C | -2.325704 | -1.692001 | -0.106404 | -0.479546 |
| C | -3.662220 | -1.486973 | -0.033279 | -0.121724 |
| C | -1.916343 | 1.977728  | 0.142498  | 0.361327  |
| C | -0.554466 | 2.180547  | 0.097225  | -1.428231 |
| C | 0.313656  | 1.075397  | -0.021529 | 0.221502  |
| C | -0.196477 | -0.226460 | -0.093811 | 0.590467  |
| N | 1.696029  | 1.170349  | -0.076898 | -0.139108 |
| C | 2.244098  | 0.011106  | -0.184469 | -0.151141 |
| S | 1.114096  | -1.357355 | -0.227930 | 0.028781  |
| C | 3.727888  | -0.237401 | -0.276113 | 0.270567  |
| H | -2.597749 | 2.817137  | 0.233248  | 0.246570  |
| H | -0.127901 | 3.176050  | 0.150483  | 0.241893  |
| H | 3.915145  | -0.721529 | -1.244671 | 0.257380  |
| C | 4.493472  | 1.083283  | -0.228830 | -0.822035 |
| C | 4.194154  | -1.192017 | 0.830933  | -0.740954 |
| H | -1.868558 | -2.670438 | -0.197771 | 0.253502  |

|   |           |           |           |          |
|---|-----------|-----------|-----------|----------|
| H | -4.443892 | -2.234056 | -0.053773 | 0.274863 |
| H | 5.270590  | -1.366522 | 0.745014  | 0.240246 |
| H | 3.993188  | -0.757136 | 1.815328  | 0.244320 |
| H | 3.688502  | -2.160816 | 0.777080  | 0.235625 |
| H | 5.564774  | 0.894161  | -0.342832 | 0.230772 |
| H | 4.164630  | 1.759926  | -1.020067 | 0.239336 |
| H | 4.325570  | 1.585403  | 0.728125  | 0.244754 |

### 3

|    |           |           |           |           |
|----|-----------|-----------|-----------|-----------|
| S  | 3.739325  | -0.143251 | 0.000209  | -0.094631 |
| C  | 2.124452  | 0.511830  | -0.000125 | -0.904300 |
| C  | 1.170631  | -0.518669 | 0.000083  | -0.488524 |
| C  | 1.763592  | -1.825394 | 0.000077  | -0.696267 |
| C  | 3.116986  | -1.766183 | -0.000449 | -0.174687 |
| C  | 1.769469  | 1.873346  | -0.000299 | 0.215354  |
| C  | 0.435100  | 2.227221  | -0.000271 | -0.435395 |
| C  | -0.533181 | 1.207832  | 0.000014  | 1.421935  |
| C  | -0.190940 | -0.150755 | 0.000192  | -0.425108 |
| S  | -2.271337 | 1.355328  | 0.000127  | 0.111673  |
| C  | -2.353496 | -0.395339 | 0.000564  | 0.164370  |
| N  | -1.249844 | -1.043161 | 0.000322  | -0.056381 |
| Cl | -3.895988 | -1.155825 | -0.000293 | 0.326178  |
| H  | 2.537015  | 2.640182  | -0.000372 | 0.250097  |
| H  | 0.141946  | 3.271232  | -0.000370 | 0.254032  |
| H  | 1.186775  | -2.741535 | 0.000135  | 0.255574  |
| H  | 3.811498  | -2.595304 | -0.000765 | 0.275983  |

### 4

|   |           |           |           |           |
|---|-----------|-----------|-----------|-----------|
| S | -4.245845 | -0.350669 | -0.000004 | -0.090979 |
| C | -2.692800 | 0.438154  | 0.000056  | -0.508394 |
| C | -1.655658 | -0.506920 | -0.000037 | 0.183445  |
| C | -2.134662 | -1.858646 | -0.000079 | -0.956282 |
| C | -3.488860 | -1.914111 | 0.000030  | -0.060057 |
| C | -2.454062 | 1.826431  | 0.000127  | -0.099059 |
| C | -1.156918 | 2.295365  | 0.000097  | 0.209870  |
| C | -0.103282 | 1.361919  | 0.000005  | 0.785667  |
| C | -0.329386 | -0.021599 | -0.000060 | -0.312683 |
| S | 1.610157  | 1.663189  | -0.000148 | 0.265298  |
| C | 1.851997  | -0.067472 | -0.000112 | -1.057053 |
| N | 0.803057  | -0.811469 | -0.000121 | -0.054383 |
| C | 3.251935  | -0.626235 | 0.000041  | 1.502565  |
| H | -3.285116 | 2.524147  | 0.000176  | 0.252339  |
| H | -0.955066 | 3.360671  | 0.000123  | 0.256421  |
| F | 3.241472  | -1.951523 | -0.000941 | -0.307427 |
| F | 3.927087  | -0.203666 | -1.076592 | -0.271431 |
| F | 3.926243  | -0.205271 | 1.077827  | -0.271318 |
| H | -1.482633 | -2.722866 | -0.000133 | 0.256399  |
| H | -4.110599 | -2.799142 | 0.000057  | 0.276846  |



S 4.404961 -0.248277 -0.000147 -0.113053  
 C 2.805701 0.448171 -0.000059 -0.799261  
 C 1.826299 -0.558200 0.000093 -0.399445  
 C 2.388944 -1.879352 0.000134 -0.703183  
 C 3.743018 -1.856500 -0.000078 -0.196462  
 C 2.485986 1.818031 -0.000127 0.402257  
 C 1.158424 2.199140 -0.000056 -0.744600  
 C 0.165356 1.205066 0.000115 1.235545  
 C 0.473026 -0.159572 0.000155 -0.007743  
 S -1.570949 1.414763 0.000056 0.383315  
 C -1.706599 -0.335775 0.000156 0.186986  
 N -0.608080 -1.018898 0.000194 -0.252824  
 N -2.929021 -0.983470 0.000299 -0.455509  
 C -4.167408 -0.372953 0.000138 0.752849  
 H 3.271364 2.566462 -0.000246 0.245176  
 H 0.888833 3.250021 -0.000040 0.247965  
 H 1.789473 -2.780949 0.000255 0.251832  
 H 4.416485 -2.702781 -0.000106 0.273391  
 H -2.855998 -1.993745 0.000506 0.492555  
 C -5.333916 -1.334111 -0.000460 -1.083554  
 O -4.282750 0.834445 0.000008 -0.526112  
 H -6.256464 -0.755913 0.005539 0.266185  
 H -5.307499 -1.969993 -0.890412 0.272178  
 H -5.301659 -1.979541 0.882373 0.271735

**Table S1.** Results obtained by molecular docking.

| Molecule                | DG <sub>bind</sub> /kcal mol <sup>-1</sup> | Number of distinctive conformational clusters | Distribution of conformations within clusters |
|-------------------------|--------------------------------------------|-----------------------------------------------|-----------------------------------------------|
| <b>4</b>                | -4.63                                      | 1                                             | 25                                            |
| <b>15</b>               | -5.14                                      | 1                                             | 25                                            |
| <i>trans</i> - <b>8</b> | -4.65                                      | 5                                             | 11 + 2 + 3 + 8 + 1                            |

Optimized geometry of complex of compound 4 and the active site of BChE  
 scf done: -5807.637725

C -23.474002 -17.457004 35.214004  
 C -19.479004 -10.103009 34.396997  
 C -10.028029 -9.157991 38.895017  
 C -14.647972 -13.805000 40.847934  
 C -14.757009 -15.940995 43.993045  
 C -11.676990 -3.152990 33.612995  
 C -11.608993 -6.215980 43.983025  
 C -13.279928 -9.172078 45.734874  
 C -11.233025 -12.314952 45.157053  
 C -20.581771 -17.597280 48.058060

|   |            |            |           |
|---|------------|------------|-----------|
| C | -15.416002 | -20.836019 | 46.740998 |
| C | -22.439003 | -5.657016  | 49.617966 |
| C | -25.971455 | -12.807736 | 46.656949 |
| C | -28.989823 | -16.761971 | 44.199033 |
| C | -20.920995 | -5.424979  | 45.684050 |
| H | -22.560511 | -16.887701 | 34.999640 |
| H | -23.860282 | -17.850255 | 34.267111 |
| H | -23.204538 | -18.318544 | 35.833842 |
| C | -24.518856 | -16.588996 | 35.913760 |
| H | -24.780911 | -15.720201 | 35.294464 |
| H | -24.107913 | -16.167797 | 36.842323 |
| C | -25.831293 | -17.320581 | 36.278687 |
| O | -26.727323 | -16.558250 | 36.792677 |
| O | -25.929605 | -18.543850 | 36.063950 |
| H | -18.715493 | -10.889644 | 34.379827 |
| H | -18.972392 | -9.139455  | 34.272740 |
| H | -20.136784 | -10.247259 | 33.532046 |
| C | -20.281091 | -10.147034 | 35.708937 |
| H | -20.755399 | -11.131747 | 35.806974 |
| H | -19.585229 | -10.059538 | 36.554101 |
| C | -21.337151 | -9.080731  | 35.810554 |
| C | -22.696577 | -9.260319  | 35.717839 |
| H | -23.261110 | -10.172899 | 35.579497 |
| C | -21.133202 | -7.661085  | 35.995246 |
| N | -23.350009 | -8.045928  | 35.823313 |
| H | -24.351218 | -7.923095  | 35.823367 |
| C | -22.418610 | -7.045724  | 36.002258 |
| C | -19.995647 | -6.849785  | 36.173171 |
| H | -18.997339 | -7.278806  | 36.182162 |
| C | -22.587581 | -5.666577  | 36.175065 |
| H | -23.577429 | -5.217545  | 36.179348 |
| C | -20.159318 | -5.480015  | 36.349203 |
| H | -19.281288 | -4.857436  | 36.494432 |
| C | -21.443317 | -4.894239  | 36.347312 |
| H | -21.541356 | -3.820985  | 36.488028 |
| H | -10.291607 | -8.143903  | 38.571968 |
| H | -8.937756  | -9.260066  | 38.841090 |
| H | -10.322133 | -9.264070  | 39.945367 |
| C | -10.723512 | -10.212235 | 38.015364 |
| H | -11.809252 | -10.060894 | 38.071547 |
| H | -10.440964 | -10.049665 | 36.967269 |
| C | -10.388899 | -11.635509 | 38.412235 |
| C | -11.062103 | -12.269990 | 39.468472 |
| H | -11.854274 | -11.737818 | 39.991127 |
| C | -9.378537  | -12.355037 | 37.763819 |
| H | -8.839056  | -11.896238 | 36.937537 |
| C | -10.748592 | -13.566646 | 39.870405 |
| H | -11.290134 | -14.040599 | 40.685198 |
| C | -9.046356  | -13.655883 | 38.149914 |
| H | -8.259640  | -14.198110 | 37.627984 |
| C | -9.732038  | -14.263073 | 39.206051 |
| O | -9.454318  | -15.539265 | 39.628336 |
| H | -8.729134  | -15.895513 | 39.090762 |
| H | -15.723771 | -13.913505 | 40.687041 |
| H | -14.112855 | -14.149805 | 39.957931 |
| H | -14.417791 | -12.742383 | 40.977367 |
| C | -14.142060 | -14.566962 | 42.057172 |
| O | -12.943048 | -14.601370 | 42.358238 |
| N | -15.085862 | -15.215221 | 42.780868 |
| H | -16.059292 | -15.095082 | 42.540623 |

|   |            |            |           |
|---|------------|------------|-----------|
| H | -15.581474 | -16.614568 | 44.238366 |
| H | -14.588284 | -15.266550 | 44.841555 |
| H | -13.847734 | -16.526281 | 43.835622 |
| H | -10.768379 | -2.985561  | 33.022567 |
| H | -11.570071 | -2.615834  | 34.562432 |
| H | -12.520204 | -2.708197  | 33.071821 |
| C | -11.906340 | -4.656733  | 33.853762 |
| H | -11.030702 | -5.073728  | 34.366816 |
| H | -11.967047 | -5.165383  | 32.882495 |
| C | -13.152871 | -4.962376  | 34.661186 |
| C | -13.092098 | -5.183962  | 36.042754 |
| H | -12.129341 | -5.153243  | 36.548488 |
| C | -14.415915 | -5.019334  | 34.051103 |
| H | -14.498384 | -4.858988  | 32.977858 |
| C | -14.238170 | -5.454499  | 36.794083 |
| H | -14.161349 | -5.630349  | 37.864810 |
| C | -15.570620 | -5.287026  | 34.782622 |
| H | -16.542343 | -5.337241  | 34.300138 |
| C | -15.484343 | -5.508891  | 36.162275 |
| O | -16.649524 | -5.777900  | 36.831000 |
| H | -16.463028 | -5.934399  | 37.771790 |
| H | -11.548467 | -5.624907  | 44.902783 |
| H | -10.607160 | -6.259179  | 43.543415 |
| C | -11.969849 | -7.665758  | 44.301736 |
| O | -11.604596 | -8.588010  | 43.559154 |
| C | -12.578465 | -5.523309  | 42.985560 |
| H | -13.070382 | -6.282292  | 42.364244 |
| H | -11.987644 | -4.900552  | 42.301795 |
| C | -13.647650 | -4.639024  | 43.659207 |
| H | -14.278353 | -4.193209  | 42.880109 |
| H | -13.152165 | -3.829259  | 44.208814 |
| C | -14.522316 | -5.464647  | 44.626572 |
| O | -15.475278 | -6.109279  | 44.117275 |
| O | -14.152935 | -5.491731  | 45.841630 |
| N | -12.685816 | -7.864663  | 45.436670 |
| H | -13.167995 | -7.041791  | 45.823366 |
| H | -13.743217 | -9.072840  | 46.724503 |
| C | -12.151098 | -10.189710 | 45.896596 |
| O | -11.150562 | -9.916622  | 46.562065 |
| C | -14.425367 | -9.458056  | 44.728042 |
| H | -14.902700 | -8.493271  | 44.522349 |
| H | -14.004829 | -9.825511  | 43.784810 |
| O | -15.382151 | -10.398454 | 45.199882 |
| H | -16.107952 | -9.863479  | 45.614563 |
| N | -12.338762 | -11.393991 | 45.305399 |
| H | -13.167951 | -11.537725 | 44.745930 |
| H | -10.414395 | -11.902152 | 45.748275 |
| H | -10.909450 | -12.332127 | 44.106483 |
| C | -11.566195 | -13.736866 | 45.612668 |
| H | -10.676964 | -14.374298 | 45.536344 |
| H | -12.343265 | -14.178678 | 44.980718 |
| H | -11.907830 | -13.743549 | 46.653851 |
| H | -19.538631 | -17.923554 | 47.970858 |
| H | -20.741315 | -16.796677 | 47.324933 |
| H | -21.215346 | -18.443656 | 47.769855 |
| C | -20.885090 | -17.108256 | 49.479174 |
| H | -20.154847 | -16.332352 | 49.748082 |
| H | -20.730985 | -17.931758 | 50.193336 |
| C | -22.301297 | -16.532825 | 49.680276 |
| H | -22.442609 | -15.733985 | 48.935942 |

|   |            |            |           |
|---|------------|------------|-----------|
| C | -23.399425 | -17.584077 | 49.457731 |
| H | -24.394791 | -17.148768 | 49.608974 |
| H | -23.290264 | -18.417399 | 50.165419 |
| H | -23.372218 | -18.000349 | 48.444956 |
| C | -22.433908 | -15.903428 | 51.075127 |
| H | -23.424604 | -15.454916 | 51.217454 |
| H | -21.684102 | -15.118647 | 51.231632 |
| H | -22.295171 | -16.658890 | 51.860463 |
| H | -16.374022 | -21.225260 | 47.106715 |
| H | -14.692910 | -21.660871 | 46.746870 |
| H | -15.559227 | -20.526022 | 45.697320 |
| C | -14.927758 | -19.658593 | 47.596983 |
| H | -14.800882 | -20.022261 | 48.628065 |
| C | -13.564674 | -19.147729 | 47.108669 |
| H | -12.812027 | -19.945668 | 47.119313 |
| H | -13.196463 | -18.328953 | 47.738345 |
| H | -13.635146 | -18.770133 | 46.079845 |
| C | -15.964750 | -18.526669 | 47.623238 |
| H | -16.931240 | -18.879458 | 48.004033 |
| H | -16.130902 | -18.126430 | 46.614165 |
| H | -15.634729 | -17.696924 | 48.259548 |
| H | -22.618000 | -6.697257  | 49.918743 |
| H | -22.844224 | -5.527527  | 48.606312 |
| H | -23.022353 | -5.012693  | 50.289011 |
| C | -20.948592 | -5.302994  | 49.661931 |
| H | -20.392338 | -5.968003  | 48.992556 |
| H | -20.556360 | -5.488960  | 50.672425 |
| C | -20.654723 | -3.850493  | 49.262133 |
| H | -21.047794 | -3.161382  | 50.019869 |
| H | -21.181012 | -3.632648  | 48.320669 |
| C | -19.146808 | -3.558593  | 49.042186 |
| O | -18.557275 | -4.268155  | 48.161086 |
| O | -18.627265 | -2.645634  | 49.721141 |
| H | -26.941694 | -12.977544 | 47.138343 |
| H | -25.994653 | -13.281526 | 45.669011 |
| H | -25.849789 | -11.728895 | 46.506966 |
| C | -24.826055 | -13.376574 | 47.514692 |
| H | -24.997151 | -14.449224 | 47.672408 |
| H | -24.852593 | -12.905893 | 48.505489 |
| C | -23.459717 | -13.167603 | 46.892623 |
| C | -22.693334 | -12.033477 | 47.198091 |
| H | -23.073563 | -11.311553 | 47.918167 |
| C | -22.944576 | -14.085645 | 45.964827 |
| H | -23.523630 | -14.972407 | 45.714176 |
| C | -21.451573 | -11.818578 | 46.595372 |
| H | -20.872310 | -10.933259 | 46.845730 |
| C | -21.703940 | -13.876239 | 45.358395 |
| H | -21.325105 | -14.594823 | 44.636913 |
| C | -20.952742 | -12.740453 | 45.672197 |
| H | -19.988161 | -12.578247 | 45.200614 |
| H | -29.163834 | -16.397361 | 45.219079 |
| H | -27.907030 | -16.836629 | 44.045173 |
| H | -29.405876 | -17.773636 | 44.123979 |
| C | -29.628926 | -15.826212 | 43.156437 |
| H | -29.214838 | -14.817420 | 43.286094 |
| H | -30.704650 | -15.747019 | 43.364175 |
| C | -29.419796 | -16.280767 | 41.725947 |
| C | -28.297815 | -15.877645 | 40.987025 |
| H | -27.577293 | -15.199788 | 41.443428 |
| C | -30.324643 | -17.147334 | 41.094613 |

|   |            |            |           |
|---|------------|------------|-----------|
| H | -31.211407 | -17.477216 | 41.634872 |
| C | -28.076135 | -16.312240 | 39.680821 |
| H | -27.206546 | -15.983739 | 39.119680 |
| C | -30.122751 | -17.593598 | 39.790155 |
| H | -30.836644 | -18.260165 | 39.312741 |
| C | -28.992576 | -17.183262 | 39.057288 |
| O | -28.842776 | -17.631767 | 37.798906 |
| H | -27.979035 | -17.258588 | 37.371896 |
| H | -21.970887 | -5.109734  | 45.682360 |
| H | -20.525304 | -5.302196  | 44.669056 |
| H | -20.359122 | -4.762252  | 46.349625 |
| C | -20.801101 | -6.891933  | 46.145946 |
| H | -21.348378 | -7.547964  | 45.458012 |
| H | -21.301751 | -6.991515  | 47.119568 |
| C | -19.390579 | -7.401050  | 46.242993 |
| N | -18.373914 | -6.698674  | 46.863412 |
| H | -18.472045 | -5.782785  | 47.351746 |
| C | -18.800183 | -8.567696  | 45.807031 |
| H | -19.260029 | -9.379785  | 45.258327 |
| C | -17.244000 | -7.442491  | 46.768144 |
| H | -16.282220 | -7.077201  | 47.100339 |
| N | -17.457900 | -8.591190  | 46.140007 |
| N | -18.582499 | -11.883650 | 42.022766 |
| C | -18.949388 | -10.792527 | 41.261184 |
| C | -19.976265 | -11.031718 | 40.319018 |
| S | -20.490877 | -12.702109 | 40.432625 |
| C | -19.290024 | -12.918512 | 41.699865 |
| C | -18.380220 | -9.498063  | 41.357361 |
| C | -18.870762 | -8.512813  | 40.470304 |
| C | -19.891286 | -8.765245  | 39.536082 |
| H | -20.238421 | -7.979311  | 38.872838 |
| C | -20.458791 | -10.029856 | 39.459042 |
| H | -21.249657 | -10.231215 | 38.744789 |
| C | -17.363222 | -8.999846  | 42.238652 |
| H | -16.889183 | -9.595443  | 43.011378 |
| C | -17.083387 | -7.683485  | 42.026215 |
| H | -16.391966 | -7.046693  | 42.577827 |
| S | -18.043795 | -6.987101  | 40.737272 |
| C | -19.051560 | -14.267888 | 42.311711 |
| F | -18.055590 | -14.938325 | 41.662589 |
| F | -20.150522 | -15.045156 | 42.235203 |
| F | -18.683770 | -14.178478 | 43.599337 |

Optimized geomtry of complex of compound 15 and the active site of BChE

scf done: -4905.780538

|   |            |            |           |
|---|------------|------------|-----------|
| C | -23.474014 | -17.456998 | 35.214014 |
| C | -19.478984 | -10.102998 | 34.397006 |
| C | -10.028065 | -9.158031  | 38.895111 |
| C | -14.648190 | -13.805081 | 40.847882 |
| C | -14.756787 | -15.940957 | 43.993040 |
| C | -11.677014 | -3.153012  | 33.613000 |
| C | -11.608914 | -6.215998  | 43.983082 |
| C | -13.280143 | -9.172032  | 45.734910 |
| C | -11.232937 | -12.314897 | 45.157010 |
| C | -20.582035 | -17.596945 | 48.058034 |
| C | -15.416029 | -20.836040 | 46.740965 |
| C | -22.438986 | -5.657014  | 49.617946 |
| C | -25.970752 | -12.807793 | 46.657064 |

|   |            |            |           |
|---|------------|------------|-----------|
| C | -28.990149 | -16.762195 | 44.198886 |
| C | -20.921000 | -5.425010  | 45.684047 |
| H | -22.852421 | -16.747437 | 34.653182 |
| H | -23.461714 | -18.417641 | 34.687629 |
| H | -23.012734 | -17.622829 | 36.193078 |
| C | -24.904409 | -16.945110 | 35.373320 |
| H | -25.368752 | -16.765675 | 34.393763 |
| H | -24.913396 | -15.970742 | 35.881653 |
| C | -25.833286 | -17.889644 | 36.168037 |
| O | -27.041998 | -17.467454 | 36.274287 |
| O | -25.372537 | -18.947109 | 36.637774 |
| H | -18.855476 | -10.368353 | 33.536473 |
| H | -20.374654 | -9.591257  | 34.025634 |
| H | -19.801266 | -11.034305 | 34.877503 |
| C | -18.705017 | -9.213300  | 35.378998 |
| H | -17.793484 | -9.737657  | 35.704116 |
| H | -18.345866 | -8.317495  | 34.851392 |
| C | -19.503547 | -8.787202  | 36.580340 |
| C | -20.762708 | -9.203491  | 36.940262 |
| H | -21.422674 | -9.909543  | 36.456441 |
| C | -19.091343 | -7.834987  | 37.585349 |
| N | -21.162106 | -8.564884  | 38.102086 |
| H | -22.033607 | -8.723753  | 38.583661 |
| C | -20.157401 | -7.719974  | 38.522866 |
| C | -17.926103 | -7.072917  | 37.788340 |
| H | -17.080744 | -7.157167  | 37.110052 |
| C | -20.091926 | -6.866748  | 39.631007 |
| H | -20.916124 | -6.796677  | 40.336315 |
| C | -17.856392 | -6.220561  | 38.884787 |
| H | -16.946386 | -5.658808  | 39.063197 |
| C | -18.929750 | -6.118835  | 39.796022 |
| H | -18.836962 | -5.456944  | 40.652826 |
| H | -9.483206  | -8.707284  | 39.732581 |
| H | -9.298496  | -9.577525  | 38.192257 |
| H | -10.626423 | -9.987753  | 39.283937 |
| C | -10.930775 | -8.125072  | 38.195330 |
| H | -11.571436 | -7.634066  | 38.938536 |
| H | -10.309447 | -7.331675  | 37.761529 |
| C | -11.806415 | -8.726562  | 37.115470 |
| C | -13.020712 | -9.350248  | 37.441544 |
| H | -13.328217 | -9.409865  | 38.480710 |
| C | -11.454320 | -8.656605  | 35.764071 |
| H | -10.525384 | -8.168229  | 35.477794 |
| C | -13.865610 | -9.861165  | 36.459851 |
| H | -14.814060 | -10.322002 | 36.720487 |
| C | -12.286883 | -9.165587  | 34.764257 |
| H | -11.999611 | -9.086249  | 33.717336 |
| C | -13.502893 | -9.763006  | 35.111978 |
| O | -14.376980 | -10.269765 | 34.182825 |
| H | -14.016173 | -10.118913 | 33.294812 |
| H | -15.534520 | -13.233629 | 41.113788 |
| H | -14.890981 | -14.413518 | 39.966746 |
| H | -13.839805 | -13.133532 | 40.561552 |
| C | -14.175972 | -14.766071 | 41.922415 |
| O | -13.122314 | -15.400944 | 41.816161 |
| N | -15.015466 | -14.935147 | 42.975920 |
| H | -15.787483 | -14.292530 | 43.093029 |
| H | -15.644820 | -16.046245 | 44.620186 |
| H | -13.904006 | -15.672671 | 44.626371 |
| H | -14.537580 | -16.901148 | 43.516749 |

|   |            |            |           |
|---|------------|------------|-----------|
| H | -10.934120 | -2.691317  | 32.951324 |
| H | -12.528290 | -2.468154  | 33.703707 |
| H | -12.037420 | -4.066369  | 33.126607 |
| C | -11.072000 | -3.458504  | 34.994756 |
| H | -10.686129 | -2.529116  | 35.432873 |
| H | -10.198160 | -4.112439  | 34.854858 |
| C | -12.039087 | -4.106612  | 35.967669 |
| C | -12.330568 | -3.534999  | 37.212968 |
| H | -11.875644 | -2.582990  | 37.482057 |
| C | -12.658300 | -5.329485  | 35.661425 |
| H | -12.449744 | -5.817108  | 34.711511 |
| C | -13.183856 | -4.156732  | 38.129729 |
| H | -13.399056 | -3.696990  | 39.090058 |
| C | -13.514838 | -5.959926  | 36.556046 |
| H | -13.961591 | -6.919067  | 36.316282 |
| C | -13.772280 | -5.393515  | 37.816925 |
| O | -14.577198 | -6.073201  | 38.658769 |
| H | -14.615745 | -5.687430  | 39.604749 |
| H | -12.325406 | -5.537781  | 44.449451 |
| H | -10.625782 | -6.021371  | 44.435381 |
| C | -11.927903 | -7.662837  | 44.328669 |
| O | -11.425339 | -8.604008  | 43.709473 |
| C | -11.535828 | -5.977231  | 42.455897 |
| H | -11.510342 | -6.952178  | 41.958392 |
| H | -10.583241 | -5.490253  | 42.211111 |
| C | -12.664708 | -5.123125  | 41.859179 |
| H | -12.486341 | -5.001737  | 40.784923 |
| H | -12.623241 | -4.111778  | 42.293264 |
| C | -14.106379 | -5.635596  | 42.078110 |
| O | -14.388167 | -6.160238  | 43.175379 |
| O | -14.930610 | -5.429261  | 41.116265 |
| N | -12.711671 | -7.851117  | 45.428021 |
| H | -13.296996 | -7.065067  | 45.681648 |
| H | -13.668699 | -9.105722  | 46.760413 |
| C | -12.144377 | -10.183503 | 45.834568 |
| O | -11.162349 | -9.943760  | 46.539844 |
| C | -14.477950 | -9.379061  | 44.803202 |
| H | -15.058381 | -8.449785  | 44.812732 |
| H | -14.104021 | -9.494669  | 43.787312 |
| O | -15.292805 | -10.476455 | 45.186695 |
| H | -16.197205 | -10.094131 | 45.306980 |
| N | -12.320886 | -11.361754 | 45.200091 |
| H | -13.098337 | -11.461676 | 44.562048 |
| H | -10.724655 | -12.267128 | 46.123252 |
| H | -10.494753 | -12.022264 | 44.398260 |
| C | -11.737384 | -13.733295 | 44.894788 |
| H | -10.901876 | -14.441447 | 44.914693 |
| H | -12.223756 | -13.831985 | 43.917939 |
| H | -12.459249 | -14.030236 | 45.664197 |
| H | -20.024950 | -18.532773 | 48.186966 |
| H | -21.156089 | -17.675870 | 47.125877 |
| H | -21.298013 | -17.521628 | 48.883644 |
| C | -19.631121 | -16.394507 | 48.016426 |
| H | -18.854736 | -16.579499 | 47.259295 |
| H | -19.103482 | -16.311900 | 48.979030 |
| C | -20.305025 | -15.043894 | 47.704367 |
| H | -20.778042 | -15.124316 | 46.712953 |
| C | -21.400369 | -14.687417 | 48.720573 |
| H | -21.818061 | -13.698643 | 48.504759 |
| H | -20.989624 | -14.668047 | 49.739465 |

|   |            |            |           |
|---|------------|------------|-----------|
| H | -22.226909 | -15.406437 | 48.704602 |
| C | -19.258247 | -13.921867 | 47.639391 |
| H | -19.707650 | -12.980457 | 47.302460 |
| H | -18.440468 | -14.175798 | 46.953827 |
| H | -18.813812 | -13.747770 | 48.628528 |
| H | -15.746862 | -21.607719 | 46.035315 |
| H | -15.211113 | -21.320945 | 47.703331 |
| H | -14.470464 | -20.422398 | 46.365974 |
| C | -16.469530 | -19.726010 | 46.888539 |
| H | -17.395995 | -20.185618 | 47.265486 |
| C | -16.020398 | -18.668079 | 47.906169 |
| H | -15.817931 | -19.116655 | 48.886489 |
| H | -16.785887 | -17.893504 | 48.040138 |
| H | -15.100177 | -18.172788 | 47.568311 |
| C | -16.782005 | -19.077963 | 45.532730 |
| H | -17.140286 | -19.817872 | 44.806800 |
| H | -15.883459 | -18.606528 | 45.112834 |
| H | -17.551271 | -18.301593 | 45.631464 |
| H | -22.818423 | -6.676845  | 49.760562 |
| H | -22.891852 | -5.257796  | 48.700824 |
| H | -22.798671 | -5.045512  | 50.455602 |
| C | -20.910691 | -5.626870  | 49.525980 |
| H | -20.575459 | -6.254113  | 48.693005 |
| H | -20.476345 | -6.070126  | 50.433693 |
| C | -20.358173 | -4.211279  | 49.339147 |
| H | -20.634488 | -3.579198  | 50.191972 |
| H | -20.827403 | -3.762927  | 48.449403 |
| C | -18.823442 | -4.141160  | 49.147314 |
| O | -18.307783 | -4.979903  | 48.335590 |
| O | -18.204354 | -3.255145  | 49.774807 |
| H | -26.785694 | -13.261221 | 47.233527 |
| H | -26.028543 | -13.190475 | 45.631695 |
| H | -26.138216 | -11.725362 | 46.618685 |
| C | -24.603334 | -13.125200 | 47.287575 |
| H | -24.475174 | -14.214845 | 47.339786 |
| H | -24.582273 | -12.760046 | 48.321644 |
| C | -23.457445 | -12.517952 | 46.507122 |
| C | -22.718088 | -11.437892 | 47.007847 |
| H | -22.955453 | -11.041650 | 47.993123 |
| C | -23.137011 | -13.013739 | 45.234109 |
| H | -23.700892 | -13.852572 | 44.830766 |
| C | -21.679167 | -10.869760 | 46.263236 |
| H | -21.105774 | -10.037239 | 46.663550 |
| C | -22.112234 | -12.440752 | 44.482826 |
| H | -21.884390 | -12.824873 | 43.492356 |
| C | -21.374811 | -11.370217 | 44.996381 |
| H | -20.569058 | -10.946854 | 44.408338 |
| H | -28.879357 | -16.162396 | 45.109187 |
| H | -28.554813 | -17.749858 | 44.391366 |
| H | -30.062609 | -16.900432 | 44.017943 |
| C | -28.305679 | -16.071495 | 43.015731 |
| H | -27.253076 | -15.886214 | 43.275850 |
| H | -28.748869 | -15.072436 | 42.887761 |
| C | -28.361203 | -16.812941 | 41.688875 |
| C | -27.692243 | -16.281267 | 40.573720 |
| H | -27.141304 | -15.347638 | 40.685185 |
| C | -29.056097 | -18.014376 | 41.500263 |
| H | -29.589835 | -18.470582 | 42.329823 |
| C | -27.708237 | -16.904687 | 39.329891 |
| H | -27.189484 | -16.475524 | 38.478632 |



|   |            |            |           |
|---|------------|------------|-----------|
| C | -29.082190 | -18.658013 | 40.261104 |
| H | -29.622323 | -19.592702 | 40.132939 |
| C | -28.408820 | -18.117536 | 39.152721 |
| O | -28.463704 | -18.768866 | 37.977882 |
| H | -27.864465 | -18.299791 | 37.277900 |
| H | -21.955279 | -5.069680  | 45.749279 |
| H | -20.496800 | -5.088085  | 44.731396 |
| H | -20.342161 | -4.961775  | 46.489971 |
| C | -20.870427 | -6.964060  | 45.792802 |
| H | -21.396124 | -7.419216  | 44.945054 |
| H | -21.428313 | -7.267849  | 46.691199 |
| C | -19.490332 | -7.557480  | 45.851144 |
| N | -18.535536 | -7.152928  | 46.765061 |
| H | -18.590140 | -6.333162  | 47.416882 |
| C | -18.904848 | -8.599262  | 45.159287 |
| H | -19.317016 | -9.172457  | 44.341459 |
| C | -17.446391 | -7.941587  | 46.591774 |
| H | -16.544706 | -7.823475  | 47.177345 |
| N | -17.627519 | -8.840721  | 45.631994 |
| C | -14.279665 | -8.717234  | 40.929349 |
| H | -14.322985 | -7.741093  | 40.463135 |
| C | -15.492273 | -9.313817  | 41.365034 |
| C | -15.408383 | -10.597949 | 41.992510 |
| C | -14.147473 | -11.210910 | 42.188686 |
| H | -14.112498 | -12.153809 | 42.722678 |
| C | -12.987346 | -10.630391 | 41.722068 |
| C | -13.074852 | -9.358760  | 41.095891 |
| H | -12.159832 | -8.879481  | 40.767306 |
| C | -16.646322 | -11.131489 | 42.389906 |
| C | -17.870741 | -10.516597 | 42.188295 |
| C | -17.936406 | -9.234174  | 41.593548 |
| H | -18.884861 | -8.727629  | 41.451643 |
| C | -16.749899 | -8.654623  | 41.202442 |
| H | -16.744152 | -7.659976  | 40.772412 |
| N | -18.882919 | -11.361760 | 42.661502 |
| C | -18.261921 | -12.407277 | 43.112522 |
| O | -16.890336 | -12.351403 | 42.988169 |
| C | -11.643556 | -11.283935 | 41.897650 |
| H | -11.736599 | -12.309762 | 42.265181 |
| H | -11.045119 | -10.703002 | 42.605714 |
| H | -11.095448 | -11.322446 | 40.949400 |
| C | -18.816853 | -13.626499 | 43.757984 |
| H | -19.811792 | -13.839277 | 43.364758 |
| H | -18.905759 | -13.484956 | 44.840267 |
| H | -18.169079 | -14.488191 | 43.574334 |

Optimized geometry of complex of trans-8 with the BChE active site  
(starting ligand's geometry from cluster of 11 poses obtained by docking)

scf done: -5265.578177

|   |            |            |           |
|---|------------|------------|-----------|
| C | -23.473396 | -17.461234 | 35.206725 |
| C | -19.478996 | -10.102991 | 34.397006 |
| C | -10.028031 | -9.157979  | 38.895006 |
| C | -14.648000 | -13.805002 | 40.848001 |
| C | -14.757012 | -15.941033 | 43.993019 |
| C | -11.677001 | -3.153008  | 33.613004 |
| C | -11.608992 | -6.216008  | 43.983002 |
| C | -13.280021 | -9.172025  | 45.734987 |
| C | -11.232998 | -12.314982 | 45.157009 |
| C | -20.582068 | -17.597050 | 48.057520 |

|   |            |            |           |
|---|------------|------------|-----------|
| C | -15.415992 | -20.835962 | 46.740978 |
| C | -22.438905 | -5.657141  | 49.617831 |
| C | -25.969807 | -12.798756 | 46.671023 |
| C | -28.991777 | -16.767038 | 44.192812 |
| C | -20.921003 | -5.424793  | 45.684078 |
| H | -22.771231 | -16.690374 | 34.864461 |
| H | -23.718247 | -18.105888 | 34.356252 |
| H | -22.959283 | -18.085451 | 35.945981 |
| C | -24.736770 | -16.839485 | 35.799401 |
| H | -25.225586 | -16.186617 | 35.061774 |
| H | -24.487903 | -16.183885 | 36.644584 |
| C | -25.792048 | -17.858222 | 36.288056 |
| O | -26.792972 | -17.322682 | 36.888841 |
| O | -25.618418 | -19.072236 | 36.069116 |
| H | -19.254035 | -11.166476 | 34.540475 |
| H | -18.540276 | -9.544711  | 34.482810 |
| H | -19.854557 | -9.968037  | 33.376080 |
| C | -20.513165 | -9.615977  | 35.428772 |
| H | -21.430491 | -10.209535 | 35.326179 |
| H | -20.129109 | -9.820343  | 36.438039 |
| C | -20.851454 | -8.156084  | 35.303175 |
| C | -22.013851 | -7.619913  | 34.805363 |
| H | -22.898883 | -8.120546  | 34.435404 |
| C | -20.012247 | -7.034307  | 35.658374 |
| N | -21.950428 | -6.237499  | 34.822378 |
| H | -22.691698 | -5.617297  | 34.534544 |
| C | -20.735519 | -5.847621  | 35.346475 |
| C | -18.727712 | -6.913472  | 36.221232 |
| H | -18.147764 | -7.796532  | 36.477352 |
| C | -20.212331 | -4.569607  | 35.578529 |
| H | -20.781408 | -3.675872  | 35.335063 |
| C | -18.203800 | -5.647501  | 36.455052 |
| H | -17.215836 | -5.555362  | 36.894954 |
| C | -18.939836 | -4.486270  | 36.135065 |
| H | -18.504701 | -3.509736  | 36.330813 |
| H | -10.825157 | -9.316275  | 39.630377 |
| H | -9.629065  | -8.147919  | 39.042277 |
| H | -9.222032  | -9.870438  | 39.107103 |
| C | -10.558561 | -9.334681  | 37.460711 |
| H | -10.978652 | -10.343448 | 37.356078 |
| H | -11.385343 | -8.633161  | 37.295525 |
| C | -9.492836  | -9.117487  | 36.406136 |
| C | -8.646175  | -10.160859 | 36.001855 |
| H | -8.781327  | -11.152679 | 36.428643 |
| C | -9.292300  | -7.857520  | 35.827527 |
| H | -9.938505  | -7.029506  | 36.110010 |
| C | -7.636098  | -9.962503  | 35.062174 |
| H | -6.988682  | -10.777821 | 34.752394 |
| C | -8.285336  | -7.639803  | 34.885113 |
| H | -8.152153  | -6.652373  | 34.446696 |
| C | -7.452118  | -8.694670  | 34.500707 |
| O | -6.446155  | -8.547153  | 33.578138 |
| H | -6.432922  | -7.624965  | 33.275867 |
| H | -14.840234 | -12.883678 | 41.405023 |
| H | -15.465535 | -13.963164 | 40.136589 |
| H | -13.729269 | -13.682142 | 40.266521 |
| C | -14.515129 | -15.033613 | 41.726715 |
| O | -14.205500 | -16.135482 | 41.270584 |
| N | -14.753342 | -14.836964 | 43.051520 |
| H | -15.099942 | -13.939852 | 43.360375 |

|   |            |            |           |
|---|------------|------------|-----------|
| H | -14.641009 | -15.550043 | 45.006208 |
| H | -13.924423 | -16.610554 | 43.766590 |
| H | -15.687381 | -16.522169 | 43.942079 |
| H | -10.905926 | -2.660461  | 33.008080 |
| H | -12.160901 | -2.391589  | 34.235299 |
| H | -12.434992 | -3.557150  | 32.931980 |
| C | -11.066697 | -4.267143  | 34.484915 |
| H | -10.293123 | -3.831921  | 35.130094 |
| H | -10.555007 | -4.986066  | 33.829705 |
| C | -12.083118 | -4.996049  | 35.343214 |
| C | -12.212041 | -4.735123  | 36.713993 |
| H | -11.557373 | -4.004973  | 37.185134 |
| C | -12.953478 | -5.945190  | 34.782728 |
| H | -12.875650 | -6.183368  | 33.723171 |
| C | -13.168899 | -5.377780  | 37.505022 |
| H | -13.224672 | -5.157839  | 38.568498 |
| C | -13.922937 | -6.586297  | 35.548850 |
| H | -14.601335 | -7.308502  | 35.103211 |
| C | -14.046622 | -6.298990  | 36.917549 |
| O | -15.031167 | -6.944891  | 37.603213 |
| H | -15.159872 | -6.585864  | 38.518687 |
| H | -11.697197 | -5.608527  | 44.892650 |
| H | -10.559221 | -6.537176  | 43.923090 |
| C | -12.407891 | -7.510387  | 44.121485 |
| O | -12.595144 | -8.262406  | 43.162473 |
| C | -11.954305 | -5.368850  | 42.748548 |
| H | -11.941891 | -6.000796  | 41.855663 |
| H | -11.155554 | -4.628177  | 42.616833 |
| C | -13.301213 | -4.643663  | 42.862146 |
| H | -13.395848 | -4.160996  | 43.842188 |
| H | -14.119995 | -5.375422  | 42.795327 |
| C | -13.550840 | -3.563892  | 41.789788 |
| O | -14.167576 | -2.535414  | 42.119595 |
| O | -13.113595 | -3.829122  | 40.606755 |
| N | -12.877676 | -7.803042  | 45.375779 |
| H | -12.502885 | -7.244403  | 46.130889 |
| H | -13.601350 | -9.137696  | 46.781789 |
| C | -12.044297 | -10.077301 | 45.635649 |
| O | -10.903620 | -9.614812  | 45.678783 |
| C | -14.515850 | -9.621829  | 44.908069 |
| H | -15.096022 | -8.724491  | 44.670341 |
| H | -14.187478 | -10.064834 | 43.963718 |
| O | -15.315493 | -10.557500 | 45.617416 |
| H | -16.129628 | -10.061836 | 45.890794 |
| N | -12.301165 | -11.400145 | 45.512488 |
| H | -13.265881 | -11.704373 | 45.449015 |
| H | -11.368905 | -13.250700 | 45.712984 |
| H | -10.303299 | -11.857324 | 45.498203 |
| C | -11.173003 | -12.601171 | 43.652887 |
| H | -10.342829 | -13.280417 | 43.425908 |
| H | -11.025070 | -11.673154 | 43.090578 |
| H | -12.099812 | -13.071708 | 43.304281 |
| H | -20.000903 | -18.509898 | 47.880642 |
| H | -21.030324 | -17.299187 | 47.101257 |
| H | -21.399096 | -17.856017 | 48.740361 |
| C | -19.692691 | -16.481798 | 48.620158 |
| H | -18.840011 | -16.335695 | 47.942180 |
| H | -19.264027 | -16.803371 | 49.581670 |
| C | -20.395745 | -15.124009 | 48.817999 |
| H | -20.849237 | -14.840294 | 47.855397 |

|   |            |            |           |
|---|------------|------------|-----------|
| C | -21.518847 | -15.190787 | 49.864292 |
| H | -22.006242 | -14.215105 | 49.974670 |
| H | -21.118914 | -15.478910 | 50.846236 |
| H | -22.292503 | -15.917534 | 49.592652 |
| C | -19.377364 | -14.036520 | 49.191581 |
| H | -19.858620 | -13.055801 | 49.281644 |
| H | -18.586784 | -13.953564 | 48.435940 |
| H | -18.896904 | -14.263454 | 50.152965 |
| H | -16.384296 | -21.161941 | 47.139786 |
| H | -14.707346 | -21.665060 | 46.857597 |
| H | -15.542835 | -20.654768 | 45.665373 |
| C | -14.916792 | -19.569892 | 47.451884 |
| H | -14.806659 | -19.805701 | 48.521311 |
| C | -13.540307 | -19.144089 | 46.921483 |
| H | -12.801555 | -19.946443 | 47.038496 |
| H | -13.164452 | -18.260615 | 47.451589 |
| H | -13.594005 | -18.894288 | 45.853396 |
| C | -15.935239 | -18.427725 | 47.326006 |
| H | -16.910424 | -18.714996 | 47.737860 |
| H | -16.086943 | -18.154007 | 46.273150 |
| H | -15.596725 | -17.530540 | 47.858175 |
| H | -22.891323 | -6.644556  | 49.775051 |
| H | -22.640889 | -5.359365  | 48.581076 |
| H | -22.960400 | -4.944866  | 50.270378 |
| C | -20.934779 | -5.673252  | 49.902285 |
| H | -20.446056 | -6.410750  | 49.254960 |
| H | -20.759234 | -6.010423  | 50.934182 |
| C | -20.261531 | -4.308706  | 49.696583 |
| H | -20.652906 | -3.582153  | 50.418904 |
| H | -20.512723 | -3.937597  | 48.691543 |
| C | -18.719663 | -4.371150  | 49.819978 |
| O | -18.122327 | -5.144618  | 48.996876 |
| O | -18.170850 | -3.677821  | 50.702432 |
| H | -26.717217 | -13.578425 | 46.483210 |
| H | -25.682633 | -12.364641 | 45.706758 |
| H | -26.443343 | -12.008916 | 47.265406 |
| C | -24.744535 | -13.378413 | 47.400948 |
| H | -24.316656 | -14.186395 | 46.794417 |
| H | -25.071372 | -13.833837 | 48.344272 |
| C | -23.678264 | -12.339410 | 47.683668 |
| C | -23.687107 | -11.603998 | 48.878203 |
| H | -24.455523 | -11.805693 | 49.622054 |
| C | -22.675160 | -12.063256 | 46.742595 |
| H | -22.649408 | -12.625003 | 45.810950 |
| C | -22.725054 | -10.621900 | 49.126574 |
| H | -22.748492 | -10.066229 | 50.060687 |
| C | -21.711138 | -11.082175 | 46.985148 |
| H | -20.939406 | -10.882256 | 46.246580 |
| C | -21.732629 | -10.356930 | 48.179423 |
| H | -20.980106 | -9.595974  | 48.367475 |
| H | -28.930019 | -16.626962 | 45.279297 |
| H | -30.050097 | -16.859571 | 43.921243 |
| H | -28.604399 | -15.861343 | 43.711832 |
| C | -28.199466 | -18.008599 | 43.744523 |
| H | -28.592222 | -18.890219 | 44.268339 |
| H | -27.155885 | -17.896986 | 44.069004 |
| C | -28.246778 | -18.245227 | 42.248701 |
| C | -27.389781 | -17.557591 | 41.376296 |
| H | -26.657074 | -16.864338 | 41.788169 |
| C | -29.168761 | -19.131818 | 41.673855 |

|   |            |            |           |
|---|------------|------------|-----------|
| H | -29.847427 | -19.687328 | 42.320219 |
| C | -27.441880 | -17.735468 | 39.995285 |
| H | -26.772458 | -17.193838 | 39.334198 |
| C | -29.236484 | -19.326446 | 40.295169 |
| H | -29.952253 | -20.022869 | 39.865590 |
| C | -28.372561 | -18.630645 | 39.428565 |
| O | -28.469004 | -18.850324 | 38.106013 |
| H | -27.769943 | -18.292882 | 37.586676 |
| H | -21.974320 | -5.135603  | 45.601140 |
| H | -20.425933 | -5.198325  | 44.732928 |
| H | -20.458480 | -4.803625  | 46.458534 |
| C | -20.807843 | -6.925982  | 46.025327 |
| H | -21.293386 | -7.512902  | 45.236574 |
| H | -21.386819 | -7.118254  | 46.939980 |
| C | -19.417124 | -7.476577  | 46.198226 |
| N | -18.501559 | -7.004936  | 47.120122 |
| H | -18.570179 | -6.202021  | 47.800545 |
| C | -18.793634 | -8.556393  | 45.602406 |
| H | -19.185042 | -9.199600  | 44.824307 |
| C | -17.403420 | -7.793234  | 47.042814 |
| H | -16.534464 | -7.627676  | 47.664843 |
| N | -17.532658 | -8.753839  | 46.136670 |
| C | -16.137143 | -7.599562  | 40.896545 |
| N | -16.003034 | -6.412264  | 40.201093 |
| C | -16.949391 | -5.543795  | 40.496818 |
| S | -18.110641 | -6.166961  | 41.668735 |
| C | -17.219346 | -7.654915  | 41.730941 |
| H | -17.533169 | -8.468884  | 42.369163 |
| C | -15.120925 | -8.686179  | 40.693473 |
| H | -14.177442 | -8.433977  | 41.192239 |
| H | -14.915332 | -8.821188  | 39.626141 |
| H | -15.476653 | -9.634821  | 41.106183 |
| C | -17.070367 | -4.191244  | 39.992765 |
| H | -18.033615 | -3.709846  | 40.140595 |
| C | -16.027571 | -3.528579  | 39.436215 |
| H | -15.070795 | -4.037736  | 39.433529 |
| C | -16.036794 | -2.182602  | 38.882053 |
| C | -14.804061 | -1.505571  | 38.632770 |
| C | -14.842729 | -0.227256  | 38.035002 |
| H | -13.892775 | 0.267065   | 37.852182 |
| C | -16.044057 | 0.382762   | 37.702555 |
| H | -16.037553 | 1.368937   | 37.243859 |
| C | -17.260508 | -0.267790  | 37.957909 |
| H | -18.205120 | 0.200697   | 37.696162 |
| C | -17.240416 | -1.529661  | 38.535681 |
| H | -18.179315 | -2.050287  | 38.704533 |
| O | -13.591184 | -2.002173  | 38.895742 |
| H | -13.513871 | -2.733009  | 39.636795 |

Optimized geometry of complex of trans-8 with the BChE active site  
(starting ligand's geometry from cluster of 8 poses obtained by docking)

scf done: -5265.587355

|   |            |            |           |
|---|------------|------------|-----------|
| C | -23.474008 | -17.457002 | 35.214000 |
| C | -19.479000 | -10.102999 | 34.396998 |
| C | -10.027999 | -9.158001  | 38.894999 |
| C | -14.648015 | -13.805001 | 40.848013 |
| C | -14.756974 | -15.941003 | 43.992989 |
| C | -11.677000 | -3.153000  | 33.613000 |
| C | -11.609016 | -6.216000  | 43.983004 |

|   |            |            |           |
|---|------------|------------|-----------|
| C | -13.280011 | -9.172041  | 45.735014 |
| C | -11.233001 | -12.315001 | 45.156998 |
| C | -20.582008 | -17.596911 | 48.057981 |
| C | -15.416005 | -20.835992 | 46.741001 |
| C | -22.439004 | -5.656997  | 49.618003 |
| C | -25.970991 | -12.808080 | 46.656992 |
| C | -28.989982 | -16.761970 | 44.199011 |
| C | -20.920989 | -5.425003  | 45.683998 |
| H | -22.870359 | -16.642876 | 34.793252 |
| H | -23.634702 | -18.207214 | 34.433114 |
| H | -22.889381 | -17.937015 | 36.006847 |
| C | -24.807366 | -16.940401 | 35.752344 |
| H | -25.362410 | -16.418124 | 34.959179 |
| H | -24.646879 | -16.188467 | 36.535975 |
| C | -25.740704 | -18.031655 | 36.325595 |
| O | -26.775648 | -17.567688 | 36.928483 |
| O | -25.452635 | -19.232301 | 36.159505 |
| H | -19.193611 | -10.858890 | 35.137744 |
| H | -18.761216 | -9.278866  | 34.469324 |
| H | -19.379007 | -10.546796 | 33.399327 |
| C | -20.919284 | -9.614882  | 34.639636 |
| H | -21.603166 | -10.471267 | 34.575017 |
| H | -21.002075 | -9.232944  | 35.665979 |
| C | -21.373925 | -8.554534  | 33.673619 |
| C | -22.303018 | -8.700321  | 32.672889 |
| H | -22.881022 | -9.571506  | 32.394127 |
| C | -20.920681 | -7.182865  | 33.600756 |
| N | -22.455661 | -7.511236  | 31.979469 |
| H | -23.094013 | -7.361979  | 31.213278 |
| C | -21.623782 | -6.559541  | 32.529193 |
| C | -19.998884 | -6.417278  | 34.339634 |
| H | -19.438012 | -6.853498  | 35.161284 |
| C | -21.431542 | -5.214923  | 32.188306 |
| H | -21.979306 | -4.758333  | 31.367607 |
| C | -19.807382 | -5.080651  | 34.005845 |
| H | -19.099884 | -4.488668  | 34.579335 |
| C | -20.516051 | -4.485451  | 32.940174 |
| H | -20.344824 | -3.438529  | 32.702758 |
| H | -10.430060 | -9.165470  | 39.914757 |
| H | -9.060195  | -9.673412  | 38.905293 |
| H | -10.708027 | -9.736202  | 38.258820 |
| C | -9.881255  | -7.716202  | 38.376234 |
| H | -10.859774 | -7.222267  | 38.418238 |
| H | -9.222701  | -7.157419  | 39.053275 |
| C | -9.324157  | -7.654625  | 36.968994 |
| C | -10.156502 | -7.816417  | 35.850002 |
| H | -11.226803 | -7.944439  | 35.994369 |
| C | -7.954141  | -7.481028  | 36.736687 |
| H | -7.281566  | -7.348452  | 37.581603 |
| C | -9.647180  | -7.810595  | 34.552524 |
| H | -10.300323 | -7.936437  | 33.694119 |
| C | -7.425213  | -7.470552  | 35.444112 |
| H | -6.356779  | -7.329621  | 35.290331 |
| C | -8.273939  | -7.637784  | 34.346209 |
| O | -7.820039  | -7.637716  | 33.051052 |
| H | -6.858272  | -7.508225  | 33.056694 |
| H | -14.894664 | -12.889939 | 41.393184 |
| H | -15.443706 | -14.002526 | 40.121886 |
| H | -13.724482 | -13.644437 | 40.283797 |
| C | -14.477636 | -15.020560 | 41.737805 |

|   |            |            |           |
|---|------------|------------|-----------|
| O | -14.080596 | -16.103451 | 41.303749 |
| N | -14.790121 | -14.839260 | 43.049198 |
| H | -15.194645 | -13.961890 | 43.343952 |
| H | -14.804381 | -15.542402 | 45.008260 |
| H | -13.827734 | -16.502873 | 43.870729 |
| H | -15.596231 | -16.632708 | 43.843265 |
| H | -10.761042 | -2.924644  | 33.053645 |
| H | -11.501230 | -2.905356  | 34.666316 |
| H | -12.472817 | -2.494139  | 33.245757 |
| C | -12.071729 | -4.631667  | 33.456022 |
| H | -11.239814 | -5.259914  | 33.799811 |
| H | -12.208445 | -4.853296  | 32.389198 |
| C | -13.331901 | -4.992016  | 34.214585 |
| C | -13.288802 | -5.340222  | 35.572298 |
| H | -12.326810 | -5.383953  | 36.080323 |
| C | -14.591147 | -4.951142  | 33.599413 |
| H | -14.661130 | -4.690259  | 32.544300 |
| C | -14.443549 | -5.637156  | 36.296290 |
| H | -14.380174 | -5.904815  | 37.347193 |
| C | -15.757731 | -5.245807  | 34.302156 |
| H | -16.726855 | -5.225524  | 33.811370 |
| C | -15.697439 | -5.593725  | 35.661392 |
| O | -16.858423 | -5.867352  | 36.302291 |
| H | -16.682116 | -6.242906  | 37.217883 |
| H | -12.084113 | -5.521398  | 44.686146 |
| H | -10.523832 | -6.104488  | 44.099086 |
| C | -11.958420 | -7.662108  | 44.303822 |
| O | -11.584037 | -8.592979  | 43.586062 |
| C | -12.002396 | -5.887697  | 42.528497 |
| H | -11.538888 | -6.629483  | 41.872366 |
| H | -11.590654 | -4.911597  | 42.247909 |
| C | -13.519275 | -5.901492  | 42.315618 |
| H | -13.989550 | -4.994428  | 42.716693 |
| H | -13.981479 | -6.731274  | 42.866244 |
| C | -13.966223 | -6.069010  | 40.868979 |
| O | -15.287686 | -6.101075  | 40.780983 |
| O | -13.197609 | -6.188238  | 39.921650 |
| N | -12.724891 | -7.860877  | 45.406482 |
| H | -13.057606 | -7.060157  | 45.924037 |
| H | -13.722346 | -9.078584  | 46.733971 |
| C | -12.125363 | -10.171946 | 45.867505 |
| O | -11.089726 | -9.862076  | 46.456036 |
| C | -14.439346 | -9.505112  | 44.760071 |
| H | -14.988621 | -8.572017  | 44.588012 |
| H | -14.028602 | -9.825670  | 43.794962 |
| O | -15.310627 | -10.501863 | 45.263073 |
| H | -16.109671 | -10.013933 | 45.590708 |
| N | -12.339939 | -11.398451 | 45.340379 |
| H | -13.202306 | -11.575111 | 44.842586 |
| H | -10.523354 | -12.124436 | 45.964669 |
| H | -10.713960 | -12.089937 | 44.213231 |
| C | -11.692689 | -13.771243 | 45.167969 |
| H | -10.837674 | -14.438765 | 45.015285 |
| H | -12.415997 | -13.967539 | 44.367600 |
| H | -12.163446 | -14.026432 | 46.123952 |
| H | -20.064931 | -18.546503 | 47.876432 |
| H | -21.076713 | -17.304954 | 47.123015 |
| H | -21.364054 | -17.786433 | 48.801728 |
| C | -19.597470 | -16.516207 | 48.520665 |
| H | -18.786835 | -16.438778 | 47.782472 |

|   |            |            |           |
|---|------------|------------|-----------|
| H | -19.121676 | -16.831130 | 49.462064 |
| C | -20.212278 | -15.116064 | 48.717621 |
| H | -20.715694 | -14.837243 | 47.778911 |
| C | -21.262916 | -15.087967 | 49.838404 |
| H | -21.690867 | -14.084390 | 49.945191 |
| H | -20.812278 | -15.364914 | 50.801443 |
| H | -22.090165 | -15.779989 | 49.645475 |
| C | -19.114843 | -14.075057 | 48.984081 |
| H | -19.537040 | -13.067201 | 49.070542 |
| H | -18.374533 | -14.059651 | 48.175064 |
| H | -18.582533 | -14.296969 | 49.918981 |
| H | -16.401298 | -21.087596 | 47.151873 |
| H | -14.797122 | -21.741104 | 46.771715 |
| H | -15.554882 | -20.562807 | 45.686585 |
| C | -14.762857 | -19.685803 | 47.520687 |
| H | -14.647013 | -20.010931 | 48.565858 |
| C | -13.364927 | -19.368646 | 46.970477 |
| H | -12.713676 | -20.250743 | 47.002246 |
| H | -12.880559 | -18.571516 | 47.547349 |
| H | -13.423383 | -19.035338 | 45.925749 |
| C | -15.655323 | -18.436428 | 47.514517 |
| H | -16.644037 | -18.649043 | 47.939097 |
| H | -15.805354 | -18.069714 | 46.490259 |
| H | -15.207041 | -17.622791 | 48.097399 |
| H | -22.857167 | -6.657287  | 49.787725 |
| H | -22.701095 | -5.354951  | 48.596040 |
| H | -22.944094 | -4.964759  | 50.304138 |
| C | -20.921403 | -5.636568  | 49.824471 |
| H | -20.448043 | -6.353253  | 49.143528 |
| H | -20.684410 | -5.981348  | 50.841486 |
| C | -20.297136 | -4.251965  | 49.602584 |
| H | -20.675777 | -3.543347  | 50.348965 |
| H | -20.608224 | -3.878128  | 48.615216 |
| C | -18.749181 | -4.255846  | 49.650611 |
| O | -18.159115 | -5.040417  | 48.833071 |
| O | -18.187188 | -3.497989  | 50.469921 |
| H | -26.805873 | -13.517984 | 46.630268 |
| H | -25.722546 | -12.537106 | 45.624682 |
| H | -26.311949 | -11.900070 | 47.167616 |
| C | -24.753483 | -13.418552 | 47.374533 |
| H | -24.458627 | -14.340328 | 46.857473 |
| H | -25.043994 | -13.708378 | 48.392194 |
| C | -23.573255 | -12.470786 | 47.434528 |
| C | -23.395564 | -11.607585 | 48.525427 |
| H | -24.098803 | -11.645966 | 49.355185 |
| C | -22.651742 | -12.404316 | 46.378723 |
| H | -22.770870 | -13.068018 | 45.524566 |
| C | -22.332057 | -10.702162 | 48.561349 |
| H | -22.212427 | -10.042681 | 49.417354 |
| C | -21.587873 | -11.500370 | 46.409067 |
| H | -20.884413 | -11.463783 | 45.581304 |
| C | -21.423912 | -10.643922 | 47.501188 |
| H | -20.597071 | -9.939422  | 47.518988 |
| H | -28.939760 | -16.547348 | 45.273900 |
| H | -30.035714 | -16.967726 | 43.941428 |
| H | -28.687450 | -15.857452 | 43.658737 |
| C | -28.088050 | -17.952524 | 43.825526 |
| H | -28.398587 | -18.831057 | 44.406568 |
| H | -27.058919 | -17.726003 | 44.136331 |
| C | -28.114017 | -18.288268 | 42.348216 |



|   |            |            |           |
|---|------------|------------|-----------|
| C | -27.336400 | -17.572023 | 41.425641 |
| H | -26.680684 | -16.779691 | 41.785243 |
| C | -28.937287 | -19.303257 | 41.839971 |
| H | -29.551875 | -19.884141 | 42.526881 |
| C | -27.371478 | -17.844528 | 40.059658 |
| H | -26.764074 | -17.280116 | 39.358883 |
| C | -28.986291 | -19.593733 | 40.477383 |
| H | -29.624852 | -20.388605 | 40.100143 |
| C | -28.202726 | -18.868441 | 39.560221 |
| O | -28.277318 | -19.182994 | 38.255509 |
| H | -27.643535 | -18.588908 | 37.694950 |
| H | -21.978724 | -5.143378  | 45.641512 |
| H | -20.456237 | -5.159012  | 44.727949 |
| H | -20.441044 | -4.829452  | 46.467666 |
| C | -20.783302 | -6.935844  | 45.966162 |
| H | -21.269626 | -7.501475  | 45.162761 |
| H | -21.346395 | -7.170780  | 46.880971 |
| C | -19.380662 | -7.464207  | 46.101819 |
| N | -18.459819 | -6.988944  | 47.016965 |
| H | -18.543717 | -6.186922  | 47.694315 |
| C | -18.745028 | -8.517382  | 45.474175 |
| H | -19.132856 | -9.150498  | 44.686554 |
| C | -17.345707 | -7.750788  | 46.905146 |
| H | -16.469439 | -7.580171  | 47.515769 |
| N | -17.471160 | -8.696506  | 45.982159 |
| C | -22.914146 | -7.066348  | 37.890386 |
| N | -21.702814 | -7.722703  | 37.903734 |
| C | -20.719866 | -6.947975  | 38.304960 |
| S | -21.252057 | -5.302356  | 38.706009 |
| C | -22.876166 | -5.758000  | 38.291089 |
| H | -23.694171 | -5.054128  | 38.356892 |
| C | -24.140055 | -7.807808  | 37.440095 |
| H | -25.028895 | -7.172429  | 37.492463 |
| H | -24.311105 | -8.694331  | 38.062353 |
| H | -24.023791 | -8.155442  | 36.406404 |
| C | -19.322518 | -7.303569  | 38.429160 |
| H | -18.624079 | -6.523423  | 38.703965 |
| C | -18.876604 | -8.571206  | 38.221604 |
| H | -19.636180 | -9.314175  | 37.977820 |
| C | -17.527181 | -9.097581  | 38.302671 |
| C | -16.360342 | -8.291817  | 38.550815 |
| C | -15.111462 | -8.959734  | 38.655163 |
| H | -14.233869 | -8.350437  | 38.852701 |
| C | -14.999284 | -10.335315 | 38.501255 |
| H | -14.020523 | -10.804724 | 38.581500 |
| C | -16.132149 | -11.119025 | 38.231382 |
| H | -16.046085 | -12.193784 | 38.097180 |
| C | -17.367553 | -10.493185 | 38.139662 |
| H | -18.257667 | -11.089180 | 37.943420 |
| O | -16.432522 | -6.981050  | 38.668784 |
| H | -15.622510 | -6.396522  | 39.848844 |
